# Supplementary material for: Comparison of Long Noncoding RNA and mRNA Expression Profiles in Mesenchymal Stem Cells Derived from Human Periodontal Ligament and Bone Marrow
Source: PubMed Central journal article supplement (PMC3985196; doi:10.1155/2014/317853), 2014-03-27
Supplement: 317853.f1.pdf [file 317853.f1.pdf]

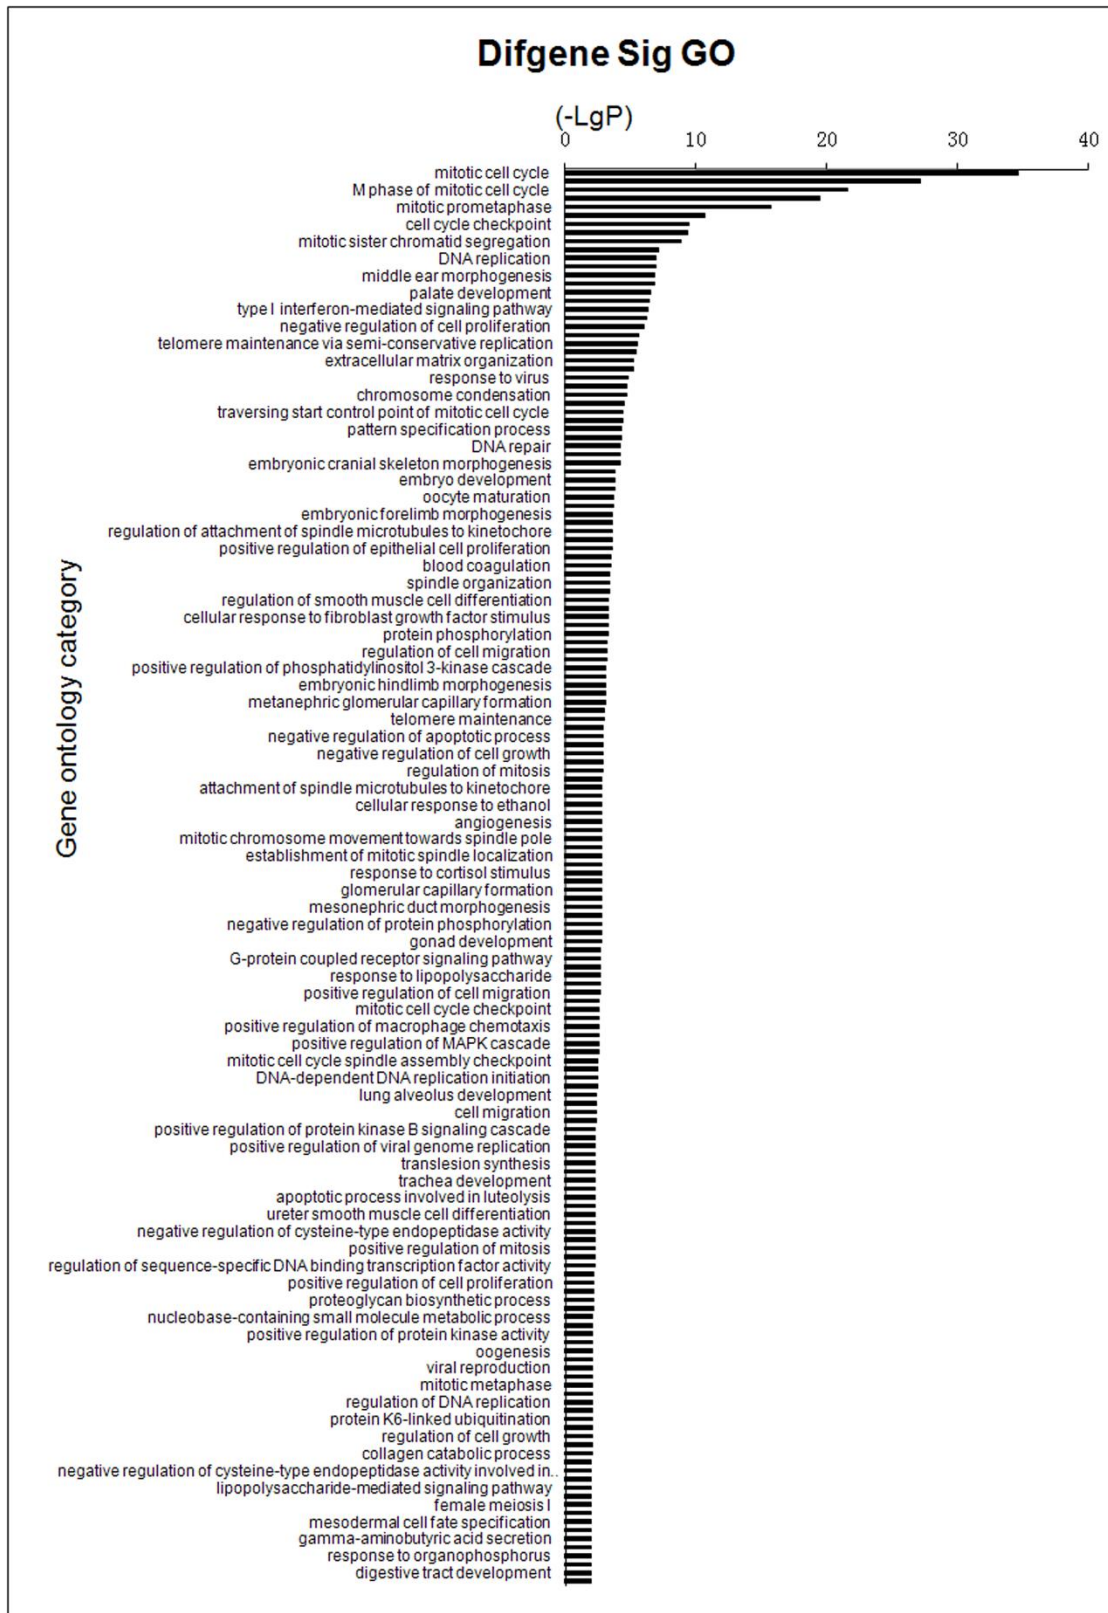

**Supplementary Fig. 1. Significant upGOs of differentially expressed genes in PDLSCs compared with BMSCs.** The y axis shows the GO category and the x axis shows the -LgP. A larger -LgP indicated a smaller P value for the difference between PDLSCs and BMSCs.

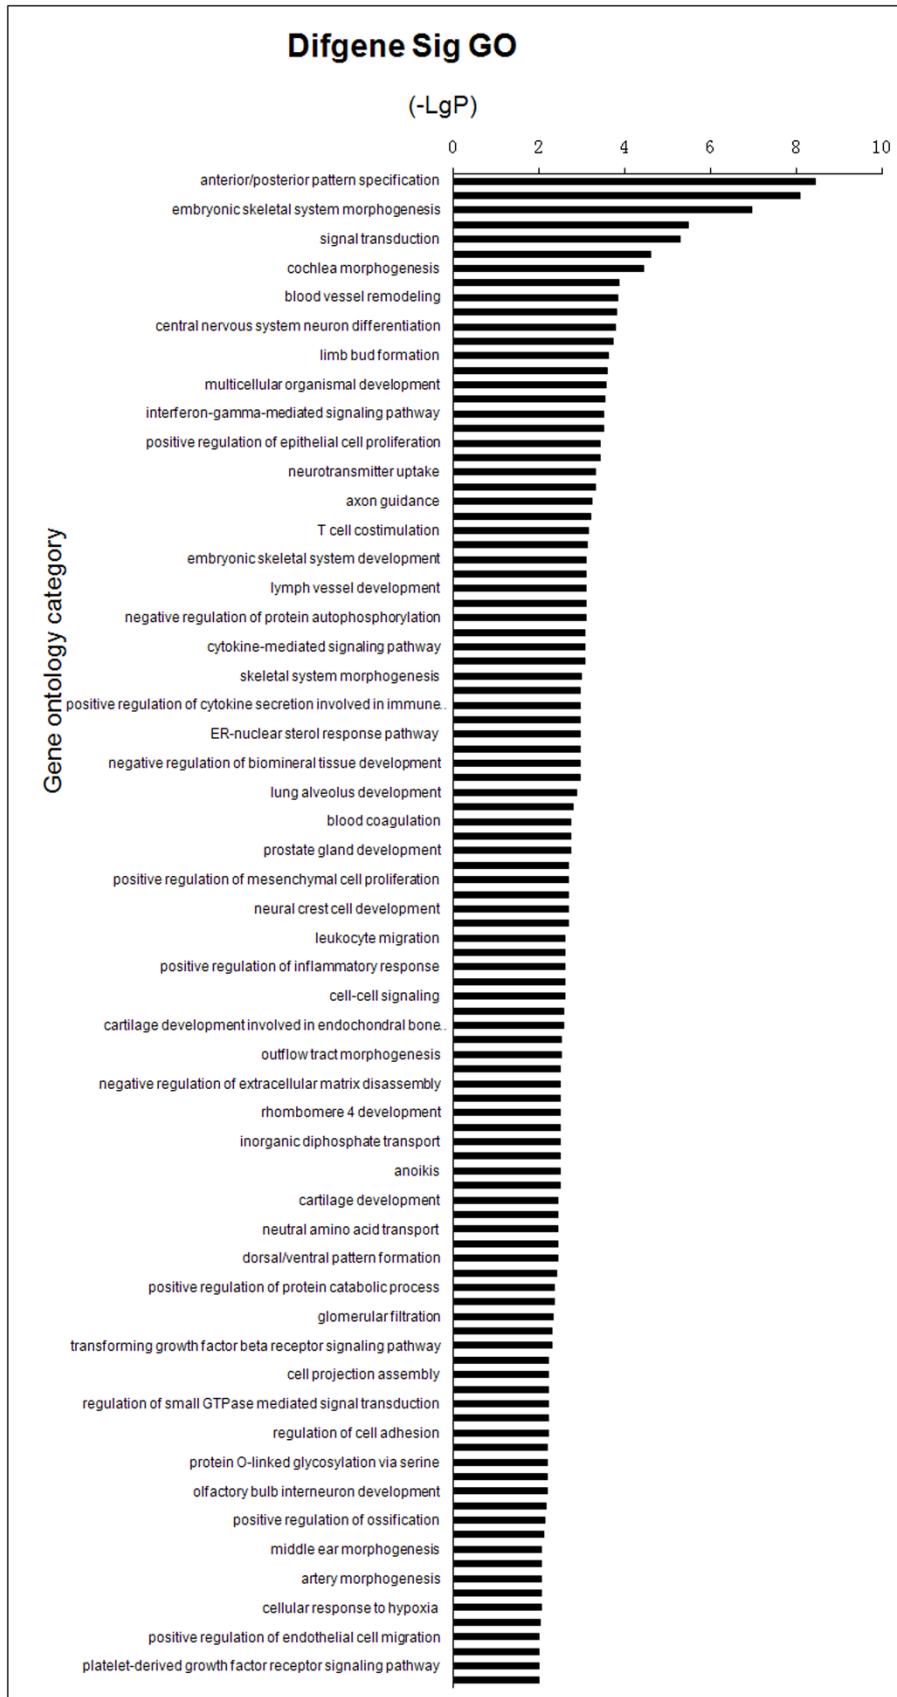

**Supplementary Fig. 2. Significant downGOs of differentially expressed genes in PDLSCs compared with BMSCs.** The y axis shows the GO category and the x axis shows the -LgP. A larger -LgP indicated a smaller P value for the difference between PDLSCs and BMSCs.

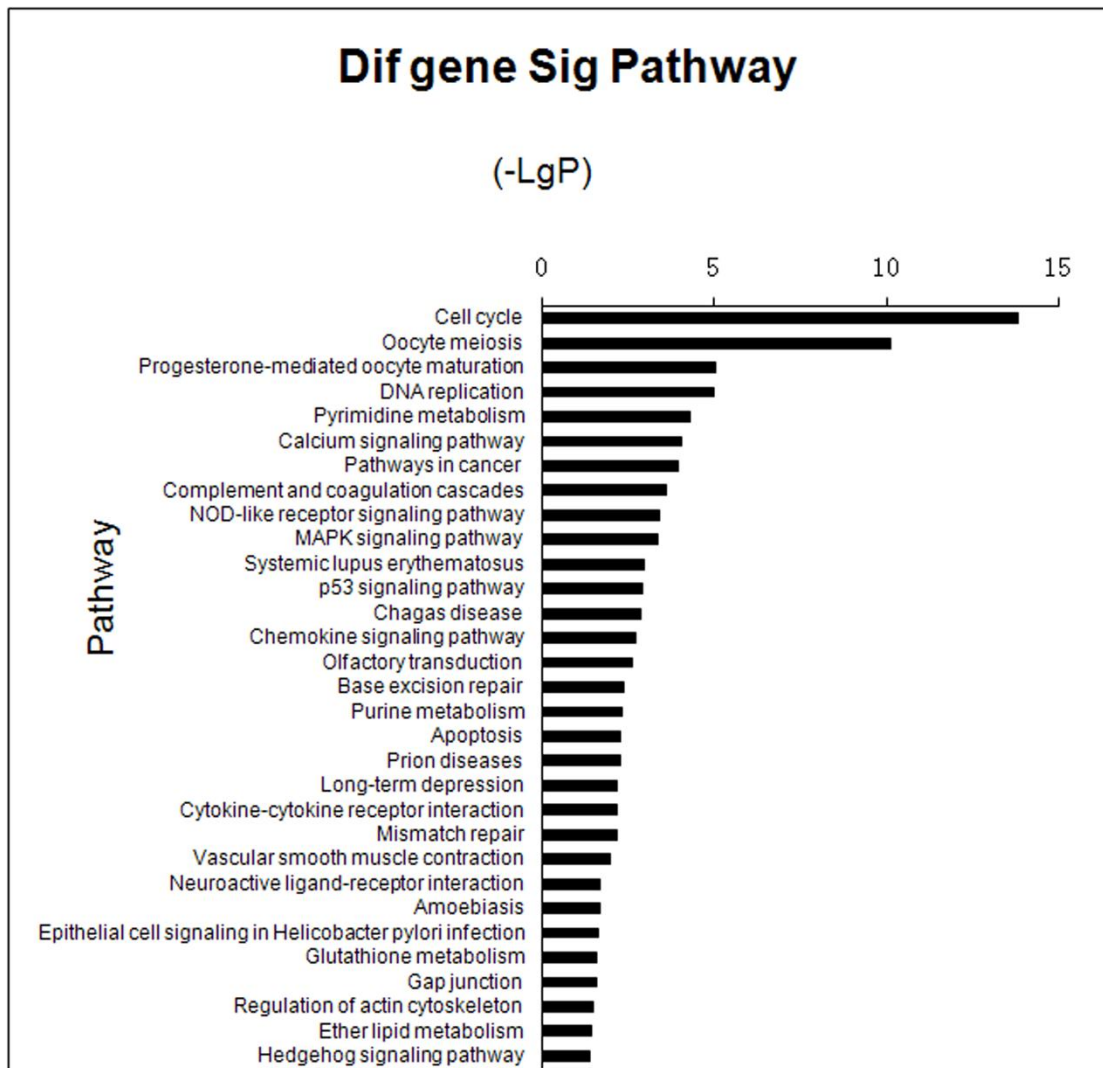

**Supplementary Fig. 3. Significantly upregulated pathways in PDLSCs compared with BMSCs.**

Based on the KEGG database, pathways with  $P < 0.05$  and  $FDR < 0.05$  were identified as pathways with significantly different behaviors in the two MSC types. The y axis shows significantly different pathways and the x axis shows the -LgP. A larger -LgP indicated a smaller P value for the difference between PDLSCs and BMSCs.

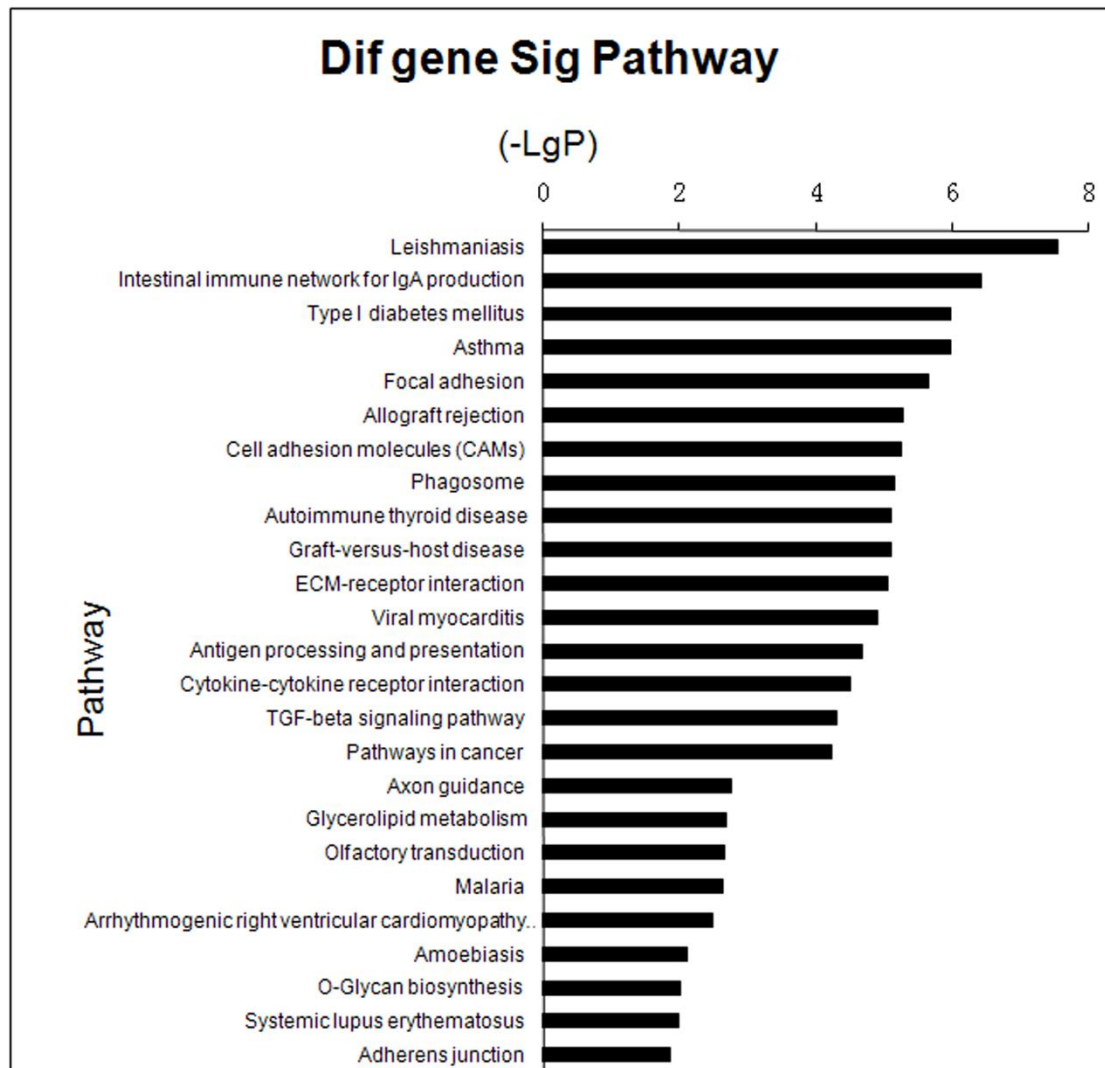

**Supplementary Fig.4. Significantly downregulated pathways in PDLSCs compared with BMSCs.** Based on the KEGG database, pathways with  $P < 0.05$  and  $FDR < 0.05$  were identified as pathways with significantly different behaviors in the two MSC types. The y axis shows significantly changed pathways and the x axis shows the  $-LgP$ . A larger  $-LgP$  indicated a smaller P value for the difference between PDLSCs and BMSCs.

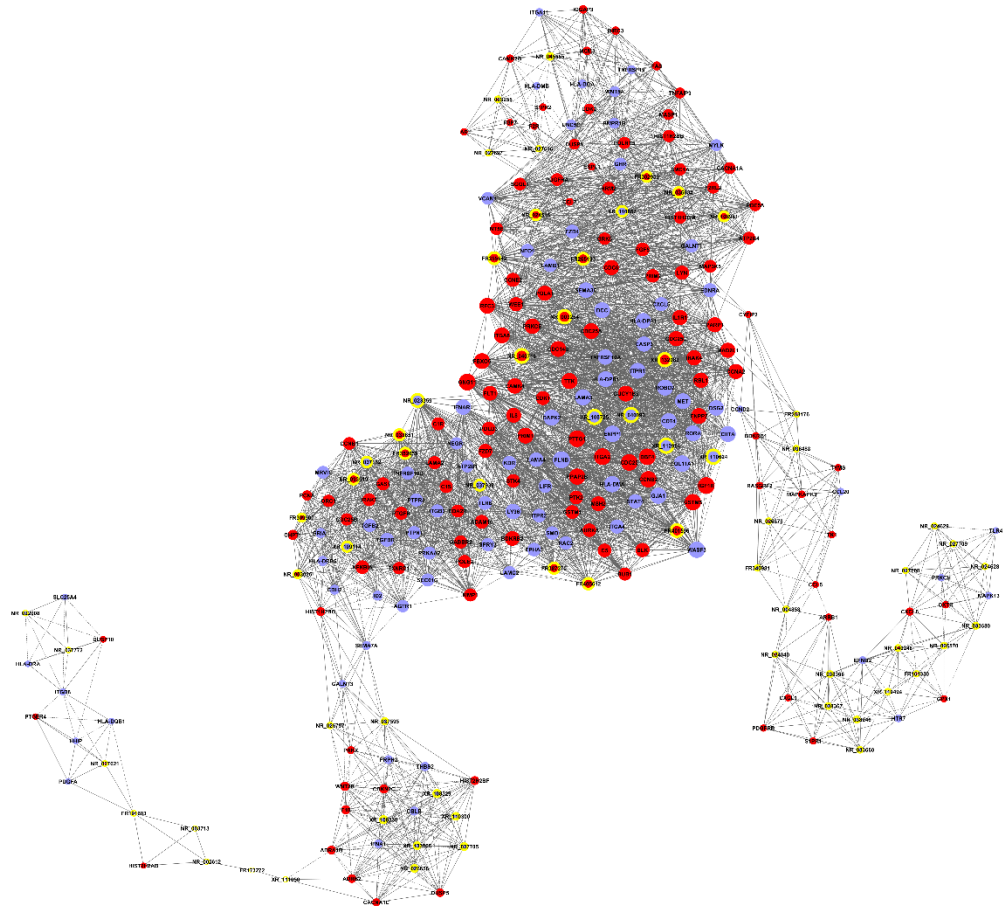

**Supplemental Fig. 5. Gene co-expression network in PDLSCs (CNC).** Circles represent up-regulated (red) genes and down-regulated (blue) genes in PDLSCs. The lines represent the regulatory relationships between genes (solid lines represent positive correlations, dotted lines represent negative correlations). The circle size represents the degree of centrality.

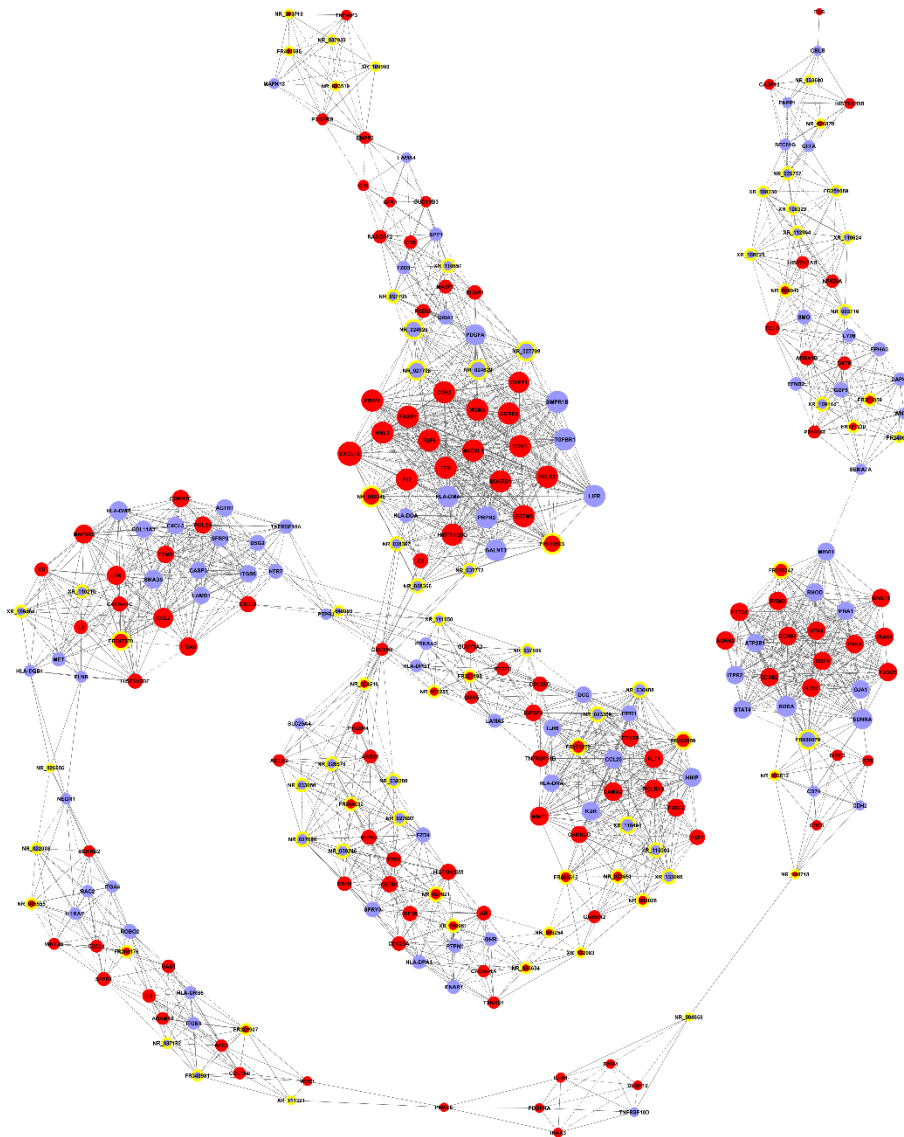

**Supplemental Fig. 6. Gene co-expression network in BMSCs (CNC).** Circles represent up-regulated (red) genes and down-regulated (blue) genes in BMSCs). The lines represent the regulatory relationships between genes (solid lines represent positive correlations, dotted lines represent negative correlations). The circle size represents the degree of centrality.



Supplementary table 1.differentially expressed lncRNA in BMSCs and PDLSCs

| ProbeSet                 | p-value  | FDR      | PDLSCs/BMSCs | style | database_ID/chromosome_locati |
|--------------------------|----------|----------|--------------|-------|-------------------------------|
| NC00589FR                | 1.00E-07 | 1.00E-07 | 33.56        | up    | FR401596                      |
| ASK01163NTNR             | 1.00E-07 | 1.00E-07 | 23.38        | up    | NR_003254                     |
| ASK05428REF_PAX9_AS001   | 1.00E-07 | 1.00E-07 | 11.28        | up    | chr14:37146567-37146943       |
| TI23418REF_MSX1_AS001    | 1.00E-07 | 1.00E-07 | 7.36         | up    | chr4:4863421-4863582          |
| TI16343REF_FBLN1_AS008   | 6.00E-07 | 6.34E-05 | 6.62         | up    | chr22:45946874-45946968       |
| ASK03099REF              | 4.50E-06 | 0.00024  | 5.48         | up    | ENST00000487335               |
| ASK00935NTNR             | 1.90E-06 | 0.00015  | 5.16         | up    | NR_045555                     |
| TI16101REF_TNS1_AS006    | 2.40E-06 | 0.00016  | 4.75         | up    | chr2:218667055-218667168      |
| ASK01183NTNR             | 1.00E-07 | 1.00E-07 | 4.7          | up    | NR_024040                     |
| ASK07241REF_RASGRF2_AS00 | 2.00E-07 | 2.78E-05 | 4.57         | up    | chr5:80409226-80409719        |
| ASK05258REF_XAF1_AS002   | 1.00E-07 | 1.00E-07 | 4.54         | up    | chr17:6676712-6678909         |
| ASK05799REF_FBN2_AS001   | 1.00E-07 | 1.65E-05 | 4.3          | up    | chr5:127594099-127594489      |
| TI20852REF_FST_AS001     | 2.10E-06 | 0.00016  | 4.27         | up    | chr5:52782287-52782418        |
| ASK00744NTNR             | 5.00E-07 | 5.50E-05 | 4.08         | up    | NR_033651                     |
| TI16101REF_TNS1_AS026    | 9.60E-06 | 0.0004   | 3.96         | up    | chr2:218665510-218665611      |
| TI19423REF_RASGRF2_AS001 | 2.00E-07 | 2.78E-05 | 3.77         | up    | chr5:80522339-80522497        |
| ASK04300REF              | 8.80E-06 | 0.0004   | 3.74         | up    | ENST00000513588               |
| TI16108REF_PIEZO2_AS003  | 2.00E-07 | 2.78E-05 | 3.7          | up    | chr18:10784823-10784959       |
| TI16108REF_PIEZO2_AS021  | 7.00E-07 | 6.60E-05 | 3.29         | up    | chr18:10770160-10770292       |
| ASK04298REF              | 1.14E-05 | 0.00045  | 3.08         | up    | ENST00000505968               |
| TI24039REF_TRIM14_AS001  | 1.40E-06 | 0.00011  | 3.06         | up    | chr9:100846340-100846447      |
| TI16099REF_KAZN_AS006    | 5.40E-05 | 0.00123  | 2.87         | up    | chr1:15393201-15393360        |
| ASK06987REF_CTSK_AS001   | 3.20E-06 | 0.00018  | 2.85         | up    | chr1:150768837-150769080      |
| ASK05728REF_PDGFRA_AS001 | 2.40E-06 | 0.00016  | 2.84         | up    | chr4:55163473-55163767        |
| TI16218REF_SEC31A_AS019  | 0.00011  | 0.00209  | 2.59         | up    | chr4:83817920-83818014        |
| TI20059REF_SIX1_AS002    | 0.000309 | 0.0041   | 2.58         | up    | chr14:61114896-61115003       |
| TI16101REF_TNS1_AS019    | 1.52E-05 | 0.00056  | 2.57         | up    | chr2:218665096-218665213      |
| ASK05232REF_SYNGR2_AS002 | 2.27E-05 | 0.00071  | 2.53         | up    | chr17:76167841-76168029       |
| TI16610REF_ELFN1_AS009   | 6.50E-06 | 0.00032  | 2.49         | up    | chr7:1786695-1786796          |
| TI16517REF_TBC1D8_AS001  | 3.55E-05 | 0.00095  | 2.48         | up    | chr2:101648947-101649194      |
| TI19633REF_MR1_AS002     | 1.67E-05 | 0.00059  | 2.45         | up    | chr1:181024988-181025086      |
| TI17807REF_LPCAT4_AS003  | 3.65E-05 | 0.00096  | 2.41         | up    | chr15:34653205-34653354       |
| NC00521FR                | 3.88E-05 | 0.00099  | 2.41         | up    | FR354232                      |
| TI17419REF_SPATA13_AS001 | 0.000187 | 0.00291  | 2.4          | up    | chr13:24879606-24879708       |
| TI16389REF_SPTBN1_AS003  | 1.53E-05 | 0.00056  | 2.38         | up    | chr2:54785399-54785497        |
| TI16036REF_EIF2B5_AS041  | 0.000287 | 0.00387  | 2.37         | up    | chr3:183861429-183861694      |
| TI17754REF_WNT5B_AS004   | 0.00168  | 0.0137   | 2.37         | up    | chr12:1751844-1751946         |
| TI16307REF_SNX5_AS009    | 3.50E-05 | 0.00094  | 2.34         | up    | chr20:17923923-17924153       |
| TI16762REF_FAM107B_AS006 | 7.03E-05 | 0.00151  | 2.33         | up    | chr10:14615006-14615097       |
| TI20546REF_HJURP_AS002   | 0.000223 | 0.00321  | 2.33         | up    | chr2:234759105-234759263      |
| TI17419REF_SPATA13_AS006 | 0.007152 | 0.0362   | 2.33         | up    | chr13:24880166-24880273       |
| TI22054REF_PAX9_AS001    | 2.50E-05 | 0.00076  | 2.3          | up    | chr14:37132911-37133035       |
| ASK02554REF              | 2.12E-05 | 0.00068  | 2.27         | up    | ENST00000480416               |
| TI14647REF               | 0.001173 | 0.0105   | 2.26         | up    | ENST00000496878               |
| TI16101REF_TNS1_AS012    | 5.60E-06 | 0.00028  | 2.25         | up    | chr2:218666131-218666254      |
| TI17613REF_PCBD2_AS004   | 0.000677 | 0.00712  | 2.25         | up    | chr5:134259034-134259191      |
| ASK05085REF_TJP2_AS002   | 0.000484 | 0.0056   | 2.24         | up    | chr9:71869318-71870081        |
| TI16517REF_TBC1D8_AS002  | 0.000931 | 0.00887  | 2.23         | up    | chr2:101649872-101649993      |
| TI17698REF_SLFNL1_AS005  | 0.0011   | 0.01     | 2.2          | up    | chr1:41484975-41485114        |
| TI17138REF_CSDA_AS007    | 5.72E-05 | 0.00128  | 2.18         | up    | chr12:10864796-10865241       |
| TI16559REF_CPT1A_AS009   | 0.001547 | 0.0128   | 2.18         | up    | chr11:68524134-68524253       |
| TI21517REF_RPS24_AS001   | 0.010599 | 0.0466   | 2.18         | up    | chr10:79794060-79794144       |

|                            |          |         |      |    |                           |
|----------------------------|----------|---------|------|----|---------------------------|
| ASK05085REF_TJP2_AS001     | 0.000734 | 0.0074  | 2.15 | up | chr9:71864154-71869263    |
| TI20047REF_IRF9_AS001      | 0.003951 | 0.0243  | 2.14 | up | chr14:24633344-24633572   |
| TI17686REF_PRDX1_AS004     | 0.000816 | 0.008   | 2.13 | up | chr1:45982922-45983045    |
| TI16389REF_SPTBN1_AS002    | 0.000101 | 0.00203 | 2.12 | up | chr2:54891445-54891577    |
| ASK01038NTNR               | 0.006637 | 0.0345  | 2.12 | up | XR_132983                 |
| ASK02328REF                | 2.71E-05 | 0.0008  | 2.09 | up | ENST00000537607           |
| TI19255REF_ODC1_AS003      | 0.000737 | 0.0074  | 2.09 | up | chr2:10587563-10587667    |
| TI16517REF_TBC1D8_AS007    | 7.36E-05 | 0.00155 | 2.08 | up | chr2:101647532-101647713  |
| TI16360REF_NFIA_AS003      | 0.000214 | 0.00316 | 2.05 | up | chr1:61926827-61926930    |
| TI16913REF_ATG16L2_AS007   | 0.002812 | 0.0191  | 2.05 | up | chr11:72534354-72534608   |
| TI16327REF_KIF22_AS013     | 0.000221 | 0.0032  | 2.04 | up | chr16:29815678-29815846   |
| NC00438FR                  | 0.000272 | 0.0037  | 2.04 | up | FR302959                  |
| TI17686REF_PRDX1_AS001     | 0.012564 | 0.0514  | 2.03 | up | chr1:45982234-45982371    |
| TI16517REF_TBC1D8_AS010    | 0.000225 | 0.00321 | 2.02 | up | chr2:101706122-101706221  |
| ASK04880REF_OPN1SW_AS002   | 0.000154 | 0.00258 | 2    | up | chr7:128412519-128413088  |
| TI16218REF_SEC31A_AS001    | 0.00093  | 0.00887 | 2    | up | chr4:83818062-83818254    |
| TI16559REF_CPT1A_AS005     | 0.001376 | 0.0118  | 2    | up | chr11:68522463-68522618   |
| ASK05274REF_RNASET2_AS00   | 0.000858 | 0.00829 | 1.99 | up | chr6:167369673-167370041  |
| ASK04913REF_ADAMTS15_ASC   | 0.000136 | 0.00236 | 1.97 | up | chr11:130317889-130319793 |
| NC00599FR                  | 0.00069  | 0.00718 | 1.97 | up | FR405612                  |
| ASK00817NTNR               | 0.000324 | 0.00421 | 1.96 | up | NR_027621                 |
| TI17807REF_LPCAT4_AS005    | 0.000175 | 0.00275 | 1.95 | up | chr15:34653486-34653599   |
| TI18282REF_OSGEP_AS002     | 0.010563 | 0.0466  | 1.95 | up | chr14:20920701-20920839   |
| ASK05822REF_MAPKAPK3_AS    | 6.56E-05 | 0.00142 | 1.94 | up | chr3:50686286-50686683    |
| ASK06516REF_ZFPM2_AS001    | 0.00037  | 0.00458 | 1.94 | up | chr8:106810784-106811176  |
| TI16640REF_EIF4G2_AS001    | 0.000669 | 0.00706 | 1.94 | up | chr11:10828588-10828687   |
| ASK01164NTNR               | 0.001581 | 0.013   | 1.94 | up | XR_108961                 |
| ASK01032NTNR               | 0.000134 | 0.00235 | 1.93 | up | NR_033519                 |
| TI19599REF_RPS4X_AS002     | 0.000964 | 0.00911 | 1.93 | up | chrX:71494100-71494321    |
| TI16099REF_KAZN_AS016      | 0.005952 | 0.0323  | 1.93 | up | chr1:15393432-15393541    |
| ASK04913REF_ADAMTS15_ASC   | 0.000199 | 0.00301 | 1.91 | up | chr11:130318587-130318953 |
| TI16146REF_FHOD3_AS016     | 0.000521 | 0.00596 | 1.91 | up | chr18:34356032-34356139   |
| TI20863REF_DEPDC1B_AS001   | 0.003045 | 0.0202  | 1.91 | up | chr5:59896235-59896331    |
| TI19599REF_RPS4X_AS001     | 0.007977 | 0.0388  | 1.91 | up | chrX:71493891-71494045    |
| TI02113NTNR                | 0.005469 | 0.0308  | 1.9  | up | NR_003026                 |
| TI20047REF_IRF9_AS002      | 0.000155 | 0.00258 | 1.89 | up | chr14:24634421-24634624   |
| ASK00705NTNR               | 0.000271 | 0.0037  | 1.88 | up | NR_040248                 |
| TI20125REF_RPL4_AS001      | 0.000828 | 0.0081  | 1.88 | up | chr15:66793465-66793683   |
| ASK06477REF_DGUOK_AS001    | 0.006365 | 0.0337  | 1.88 | up | chr2:74185251-74208448    |
| TI09189REF                 | 0.000169 | 0.00269 | 1.87 | up | ENST00000563240           |
| ASK07329REF_PRKCE_AS001    | 0.000189 | 0.00292 | 1.87 | up | chr2:46414063-46414472    |
| ASK00927NTNR               | 0.001124 | 0.0101  | 1.87 | up | NR_002612                 |
| NC00236FR                  | 0.001874 | 0.0146  | 1.87 | up | FR161330                  |
| TI17138REF_CSDA_AS003      | 0.002086 | 0.0156  | 1.87 | up | chr12:10865708-10865806   |
| ASK05545REF_DHCR24_AS001   | 7.97E-05 | 0.00166 | 1.86 | up | chr1:55352550-55352777    |
| TI11541REF                 | 0.000106 | 0.00203 | 1.85 | up | ENST00000559863           |
| TI19693REF_STMN1_AS001     | 0.000122 | 0.00222 | 1.85 | up | chr1:26229659-26229760    |
| TI19372REF_LSG1_AS001      | 0.000326 | 0.00422 | 1.85 | up | chr3:194371514-194371602  |
| TI20214REF_NQO1_AS001      | 0.007139 | 0.0362  | 1.85 | up | chr16:69751402-69751482   |
| TI15124REF                 | 0.009272 | 0.0427  | 1.85 | up | ENST00000482261           |
| TI19861REF_IFITM2_AS002    | 0.000159 | 0.00258 | 1.84 | up | chr11:314409-314506       |
| ASK06414REF_SLITRK2_AS001  | 0.00218  | 0.0159  | 1.84 | up | chrX:144903929-144963163  |
| TI16829REF_C20orf111_AS008 | 0.002262 | 0.0162  | 1.84 | up | chr20:42837344-42837545   |
| TI13444REF                 | 0.003    | 0.02    | 1.84 | up | ENST00000552548           |
| TI20585REF_ASIP_AS001      | 0.005092 | 0.0293  | 1.84 | up | chr20:32803699-32803793   |



|                              |          |         |      |    |                           |
|------------------------------|----------|---------|------|----|---------------------------|
| TI16936REF_ZNF219_AS004      | 0.016262 | 0.0616  | 1.84 | up | chr14:21565242-21565327   |
| TI16120REF_DGKD_AS024        | 0.021632 | 0.0752  | 1.84 | up | chr2:234371411-234371530  |
| TI18602REF_TNIP1_AS003       | 0.000103 | 0.00203 | 1.83 | up | chr5:150413890-150414042  |
| TI17696REF_SLC30A1_AS005     | 0.000442 | 0.00526 | 1.83 | up | chr1:211746039-211746133  |
| ASK05012REF_TFRC_AS002       | 0.000624 | 0.00672 | 1.83 | up | chr3:195776363-195776662  |
| TI16435REF_ZFH3_AS005        | 0.006046 | 0.0325  | 1.83 | up | chr16:73080301-73080426   |
| TI17527REF_LTBP1_AS005       | 0.008931 | 0.0417  | 1.83 | up | chr2:33468124-33468259    |
| TI17774REF_SMARCC2_AS001     | 0.000385 | 0.00475 | 1.82 | up | chr12:56572488-56572589   |
| TI17622REF_SHROOM1_AS005     | 0.000695 | 0.00718 | 1.82 | up | chr5:132163839-132163966  |
| TI16445REF_THADA_AS012       | 0.027233 | 0.0884  | 1.82 | up | chr2:43449704-43449798    |
| ASK04743REF_THADA_AS003      | 0.000224 | 0.00321 | 1.81 | up | chr2:43451447-43451663    |
| TI19441REF_DUSP1_AS003       | 0.00111  | 0.01    | 1.81 | up | chr5:172196994-172197149  |
| TI17025REF_EIF4A2_AS002      | 0.002214 | 0.016   | 1.81 | up | chr3:186502579-186502744  |
| ASK00777NTNR                 | 0.009109 | 0.0422  | 1.81 | up | NR_003255                 |
| TI16880REF_PTBP2_AS008       | 0.014883 | 0.0589  | 1.81 | up | chr1:97262663-97262770    |
| TI13458REF                   | 0.026846 | 0.0878  | 1.81 | up | ENST00000474791           |
| TI16389REF_SPTBN1_AS005      | 0.001559 | 0.0129  | 1.8  | up | chr2:54891296-54891418    |
| TI21406REF_DUSP10_AS001      | 0.002351 | 0.0167  | 1.8  | up | chr1:221914262-221914425  |
| ASK04606REF                  | 0.000346 | 0.00442 | 1.79 | up | ENST00000470972           |
| TI16389REF_SPTBN1_AS007      | 0.000537 | 0.00605 | 1.79 | up | chr2:54889553-54889671    |
| TI17374REF_VCL_AS002         | 0.000636 | 0.00683 | 1.79 | up | chr10:75760815-75760941   |
| TI20632REF_ETS2_AS001        | 0.000955 | 0.00907 | 1.79 | up | chr21:40181502-40181743   |
| TI16131REF_EEF1D_AS018       | 0.001772 | 0.0141  | 1.79 | up | chr8:144678373-144678643  |
| TI17836REF_RP11-1035H13.3_A  | 0.003192 | 0.0209  | 1.79 | up | chr16:18807571-18807710   |
| TI16687REF_TGIF1_AS001       | 0.004903 | 0.0286  | 1.79 | up | chr18:3451196-3451315     |
| TI16389REF_SPTBN1_AS013      | 0.047046 | 0.131   | 1.79 | up | chr2:54890259-54890410    |
| TI16218REF_SEC31A_AS015      | 0.006321 | 0.0335  | 1.78 | up | chr4:83818496-83818601    |
| ASK07289REF_NDST1_AS001      | 0.008315 | 0.0396  | 1.78 | up | chr5:149919122-149919271  |
| ASK04945REF_CDKN2C_AS002     | 0.013673 | 0.0551  | 1.78 | up | chr1:51439961-51440281    |
| TI19441REF_DUSP1_AS002       | 0.000689 | 0.00718 | 1.77 | up | chr5:172196150-172196259  |
| TI19051REF_TAF1C_AS003       | 0.001628 | 0.0134  | 1.77 | up | chr16:84215677-84215803   |
| TI17492REF_TRIM25_AS002      | 0.00192  | 0.0149  | 1.77 | up | chr17:54974989-54975093   |
| TI18223REF_NCAPD3_AS004      | 0.023488 | 0.0795  | 1.77 | up | chr11:134024802-134024909 |
| TI17362REF_CSF1_AS002        | 0.000197 | 0.00301 | 1.76 | up | chr1:110472988-110473216  |
| TI16920REF_TNKS1BP1_AS004    | 0.001655 | 0.0136  | 1.76 | up | chr11:57074597-57074720   |
| TI16559REF_CPT1A_AS004       | 0.001817 | 0.0144  | 1.76 | up | chr11:68524334-68524453   |
| TI01378NTNR                  | 0.001943 | 0.0149  | 1.76 | up | NR_036634                 |
| TI17505REF_PTBP1_AS004       | 0.002169 | 0.0159  | 1.76 | up | chr19:807903-808083       |
| TI18660REF_FAM120A_AS001     | 0.003537 | 0.0224  | 1.76 | up | chr9:96308812-96308961    |
| TI11628REF                   | 0.005566 | 0.0309  | 1.76 | up | ENST00000563473           |
| TI17532REF_EPAS1_AS005       | 0.012495 | 0.0513  | 1.76 | up | chr2:46608094-46608293    |
| TI17324REF_ZFP41_AS007       | 0.013553 | 0.0547  | 1.76 | up | chr8:144355848-144356005  |
| TI19721REF_AHCTF1_AS001      | 0.000401 | 0.00487 | 1.75 | up | chr1:247087242-247087390  |
| TI20920REF_FAM46A_AS002      | 0.001191 | 0.0106  | 1.75 | up | chr6:82460499-82460632    |
| TI19855REF_BANF1_AS002       | 0.002039 | 0.0153  | 1.75 | up | chr11:65770390-65770497   |
| ASK04974REF_QPCT_AS002       | 0.007004 | 0.0357  | 1.75 | up | chr2:37599831-37599977    |
| TI16437REF_ADCY9_AS013       | 0.011905 | 0.0502  | 1.75 | up | chr16:4155957-4156056     |
| TI16334REF_RP11-159D12.5_AS0 | 0.012328 | 0.0513  | 1.75 | up | chr17:56067505-56067640   |
| TI17841REF_RPAIN_AS005       | 0.015236 | 0.0593  | 1.75 | up | chr17:5335415-5335506     |
| TI16362REF_PABPC4_AS007      | 0.001116 | 0.0101  | 1.74 | up | chr1:40034945-40035125    |
| TI16729REF_RP11-514O12.4_AS0 | 0.003717 | 0.0233  | 1.74 | up | chr6:167368983-167369110  |
| TI17383REF_TM9SF3_AS006      | 0.006865 | 0.0353  | 1.74 | up | chr10:98278213-98278311   |
| TI16178REF_ASPCR1_AS017      | 0.021163 | 0.0741  | 1.74 | up | chr17:79971816-79971909   |
| TI16287REF_FAM53B_AS007      | 0.027713 | 0.0892  | 1.74 | up | chr10:126353820-126353967 |
| TI18602REF_TNIP1_AS004       | 0.000323 | 0.00421 | 1.73 | up | chr5:150413595-150413829  |

|                           |          |         |      |    |                           |
|---------------------------|----------|---------|------|----|---------------------------|
| TI21125REF_SMC1A_AS001    | 0.001239 | 0.0109  | 1.73 | up | chrX:53426775-53426880    |
| ASK04880REF_OPN1SW_AS001  | 0.00142  | 0.0121  | 1.73 | up | chr7:128412857-128413017  |
| TI17525REF_CFLAR_AS002    | 0.001664 | 0.0136  | 1.73 | up | chr2:202028225-202028335  |
| TI22106REF_FAM63B_AS001   | 0.00194  | 0.0149  | 1.73 | up | chr15:59152108-59152233   |
| TI18554REF_UBP1_AS002     | 0.003801 | 0.0237  | 1.73 | up | chr3:33444752-33444865    |
| TI17649REF_RALGPS1_AS004  | 0.013119 | 0.0534  | 1.73 | up | chr9:129942507-129942603  |
| TI16389REF_SPTBN1_AS014   | 0.016049 | 0.0611  | 1.73 | up | chr2:54890072-54890202    |
| TI19903REF_BDNF_AS001     | 0.000434 | 0.0052  | 1.72 | up | chr11:27720487-27720580   |
| TI17627REF_EEF1A1_AS001   | 0.000563 | 0.00622 | 1.72 | up | chr6:74229279-74229381    |
| ASK04849REF_S100A4_AS001  | 0.000744 | 0.00742 | 1.72 | up | chr1:153518289-153521228  |
| TI17277REF_PVRL3_AS002    | 0.000856 | 0.00829 | 1.72 | up | chr3:110916506-110916598  |
| ASK06744REF_TOR1B_AS001   | 0.000985 | 0.00916 | 1.72 | up | chr9:132572829-132573279  |
| TI22199REF_PDPR_AS001     | 0.001968 | 0.015   | 1.72 | up | chr16:70152834-70152991   |
| TI17531REF_IL1R1_AS002    | 0.002183 | 0.0159  | 1.72 | up | chr2:102764137-102764231  |
| TI01740NTNR               | 0.002372 | 0.0168  | 1.72 | up | NR_003713                 |
| TI20465REF_BZW1_AS001     | 0.002538 | 0.0176  | 1.72 | up | chr2:201677547-201677683  |
| ASK05012REF_TFRC_AS001    | 0.002544 | 0.0176  | 1.72 | up | chr3:195776191-195776357  |
| ASK05416REF_THBS4_AS001   | 0.004206 | 0.0256  | 1.72 | up | chr5:79378208-79378353    |
| ASK07102REF_LARGE_AS001   | 0.004344 | 0.0262  | 1.72 | up | chr22:33669257-33669740   |
| TI16954REF_SLC12A4_AS003  | 0.005289 | 0.0302  | 1.72 | up | chr16:67995922-67996084   |
| ASK03079REF               | 0.006551 | 0.0342  | 1.72 | up | ENST00000469305           |
| TI19214REF_PROC_AS002     | 0.015969 | 0.0611  | 1.72 | up | chr2:128184566-128184666  |
| TI16218REF_SEC31A_AS010   | 0.021053 | 0.074   | 1.72 | up | chr4:83818286-83818416    |
| TI16933REF_PCID2_AS002    | 0.046832 | 0.131   | 1.72 | up | chr13:113837482-113837640 |
| TI21821REF_PFDN5_AS001    | 0.000424 | 0.00511 | 1.71 | up | chr12:53689801-53689967   |
| TI16902REF_PPRC1_AS001    | 0.000702 | 0.00718 | 1.71 | up | chr10:103907407-103907504 |
| NC00572FR                 | 0.00491  | 0.0286  | 1.71 | up | FR387370                  |
| TI17391REF_SYT12_AS004    | 0.008468 | 0.0401  | 1.71 | up | chr11:66798201-66798332   |
| TI17816REF_PHKG2_AS003    | 0.020947 | 0.0738  | 1.71 | up | chr16:30763742-30763900   |
| TI16706REF_PCMTD2_AS005   | 0.024743 | 0.0825  | 1.71 | up | chr20:62888856-62889034   |
| ASK04743REF_THADA_AS004   | 0.001002 | 0.00928 | 1.7  | up | chr2:43451148-43451414    |
| TI19772REF_DUSP5_AS001    | 0.001303 | 0.0113  | 1.7  | up | chr10:112266485-112266582 |
| TI18461REF_NIF3L1_AS003   | 0.006645 | 0.0345  | 1.7  | up | chr2:201755321-201755447  |
| TI16379REF_SRRM2_AS011    | 0.006758 | 0.035   | 1.7  | up | chr16:2804062-2804178     |
| ASK03908REF               | 0.00927  | 0.0427  | 1.7  | up | ENST00000491456           |
| TI21965REF_FRY_AS001      | 0.01729  | 0.0641  | 1.7  | up | chr13:32743214-32743319   |
| TI19772REF_DUSP5_AS002    | 0.001248 | 0.011   | 1.69 | up | chr10:112265372-112265500 |
| TI15207REF                | 0.002359 | 0.0167  | 1.69 | up | ENST00000505745           |
| NC00388FR                 | 0.010489 | 0.0464  | 1.69 | up | FR268176                  |
| TI16357REF_BCAN_AS010     | 0.000781 | 0.00775 | 1.68 | up | chr1:156613165-156613355  |
| NC00277FR                 | 0.00118  | 0.0105  | 1.68 | up | FR191603                  |
| ASK05283REF_ERCC6_AS001   | 0.001273 | 0.0112  | 1.68 | up | chr10:50723366-50723653   |
| ASK01019NTNR              | 0.001703 | 0.0138  | 1.68 | up | NR_024516                 |
| TI16389REF_SPTBN1_AS008   | 0.002729 | 0.0187  | 1.68 | up | chr2:54891140-54891250    |
| TI16531REF_ANXA5_AS011    | 0.000927 | 0.00887 | 1.67 | up | chr4:122602048-122602181  |
| ASK05718REF_LUM_AS001     | 0.0022   | 0.016   | 1.67 | up | chr12:91497423-91497789   |
| TI16560REF_OPCML_AS003    | 0.005493 | 0.0308  | 1.67 | up | chr11:133018475-133018589 |
| TI19201REF_C19orf48_AS003 | 0.006452 | 0.0339  | 1.67 | up | chr19:51307191-51307301   |
| TI16099REF_KAZN_AS008     | 0.008196 | 0.0393  | 1.67 | up | chr1:15393995-15394202    |
| TI17076REF_SCML1_AS007    | 0.008796 | 0.0412  | 1.67 | up | chrX:17761438-17761572    |
| TI18691REF_CDK16_AS002    | 0.001351 | 0.0117  | 1.66 | up | chrX:47080062-47080164    |
| TI16445REF_THADA_AS006    | 0.001862 | 0.0145  | 1.66 | up | chr2:43450178-43450311    |
| TI19543REF_ODF2_AS002     | 0.003684 | 0.0232  | 1.66 | up | chr9:131257827-131258088  |
| TI16146REF_FHOD3_AS018    | 0.004826 | 0.0283  | 1.66 | up | chr18:34355733-34355834   |
| TI16088REF_OBSCN_AS017    | 0.005847 | 0.0318  | 1.66 | up | chr1:228499414-228499523  |

|                           |          |        |      |    |                           |
|---------------------------|----------|--------|------|----|---------------------------|
| TI19225REF_CDCA7_AS002    | 0.023401 | 0.0793 | 1.66 | up | chr2:174228776-174229095  |
| TI21336REF_LRRC40_AS001   | 0.046999 | 0.131  | 1.66 | up | chr1:70613399-70613502    |
| TI23048REF_UBE2C_AS001    | 0.002506 | 0.0175 | 1.65 | up | chr20:44442192-44442303   |
| TI16881REF_RNPEP_AS002    | 0.003284 | 0.0212 | 1.65 | up | chr1:201962307-201962406  |
| TI16031REF_MAD1L1_AS061   | 0.004006 | 0.0246 | 1.65 | up | chr7:2099997-2100116      |
| TI18776REF_MCL1_AS001     | 0.004495 | 0.0267 | 1.65 | up | chr1:150550280-150550713  |
| TI16784REF_PDE8A_AS008    | 0.00655  | 0.0342 | 1.65 | up | chr15:85637579-85637715   |
| ASK05232REF_SYNGR2_AS001  | 0.00984  | 0.0445 | 1.65 | up | chr17:76168131-76168731   |
| TI20920REF_FAM46A_AS001   | 0.010257 | 0.0457 | 1.65 | up | chr6:82461001-82461138    |
| TI16343REF_FBLN1_AS012    | 0.01702  | 0.0636 | 1.65 | up | chr22:45975588-45975691   |
| TI16464REF_PILRB_AS006    | 0.002194 | 0.016  | 1.64 | up | chr7:99947681-99947819    |
| TI22184REF_SNAPC5_AS001   | 0.002303 | 0.0164 | 1.64 | up | chr15:66786278-66786689   |
| TI16711REF_SUN2_AS008     | 0.005486 | 0.0308 | 1.64 | up | chr22:39136616-39136766   |
| TI16488REF_PHLDB1_AS001   | 0.007052 | 0.0358 | 1.64 | up | chr11:118513350-118513467 |
| TI16099REF_KAZN_AS015     | 0.008133 | 0.0392 | 1.64 | up | chr1:15392693-15392802    |
| TI17076REF_SCML1_AS004    | 0.010162 | 0.0456 | 1.64 | up | chrX:17763859-17763982    |
| NC00526FR                 | 0.010501 | 0.0464 | 1.64 | up | FR355542                  |
| TI16231REF_GPR133_AS005   | 0.019439 | 0.0703 | 1.64 | up | chr12:131616029-131616134 |
| TI18083REF_DFN31_AS001    | 0.027484 | 0.089  | 1.64 | up | chr9:117222930-117223071  |
| TI17949REF_SUCLG1_AS002   | 0.02757  | 0.0891 | 1.64 | up | chr2:84652024-84652156    |
| TI16976REF_NDUFV2_AS002   | 0.03592  | 0.108  | 1.64 | up | chr18:9116134-9116326     |
| TI21657REF_ACAD8_AS001    | 0.043639 | 0.124  | 1.64 | up | chr11:134130506-134130616 |
| TI16307REF_SNX5_AS015     | 0.001786 | 0.0142 | 1.63 | up | chr20:17925559-17925754   |
| TI16541REF_PRDX6_AS001    | 0.002038 | 0.0153 | 1.63 | up | chr1:173452741-173452938  |
| TI17277REF_PVRL3_AS007    | 0.005329 | 0.0303 | 1.63 | up | chr3:110918257-110918403  |
| TI17577REF_RPL3_AS003     | 0.006587 | 0.0344 | 1.63 | up | chr22:39714078-39714234   |
| TI17760REF_TUBA1C_AS003   | 0.0272   | 0.0884 | 1.63 | up | chr12:49665440-49665554   |
| TI16426REF_AKT1_AS006     | 0.037598 | 0.111  | 1.63 | up | chr14:105238226-105238393 |
| ASK04417REF               | 0.001804 | 0.0143 | 1.62 | up | ENST00000426590           |
| ASK02378REF               | 0.001986 | 0.0151 | 1.62 | up | ENST00000555759           |
| TI16091REF_GAK_AS014      | 0.002478 | 0.0174 | 1.62 | up | chr4:904051-904192        |
| TI21044REF_TOX_AS002      | 0.006294 | 0.0334 | 1.62 | up | chr8:59837546-59837656    |
| TI18751REF_C1orf100_AS002 | 0.007927 | 0.0386 | 1.62 | up | chr1:244537464-244537561  |
| TI17393REF_CCDC84_AS003   | 0.008026 | 0.0389 | 1.62 | up | chr11:118881056-118881208 |
| TI17362REF_CSF1_AS005     | 0.015983 | 0.0611 | 1.62 | up | chr1:110472374-110472620  |
| TI16053REF_SEPT9_AS022    | 0.02328  | 0.0791 | 1.62 | up | chr17:75490729-75490881   |
| TI18721REF_B4GALT2_AS003  | 0.036105 | 0.108  | 1.62 | up | chr1:44446046-44446170    |
| TI17633REF_MAFK_AS001     | 0.036514 | 0.109  | 1.62 | up | chr7:1571943-1572056      |
| TI22781REF_TTL_AS001      | 0.002386 | 0.0168 | 1.61 | up | chr2:113280432-113280685  |
| ASK05360REF_ABCC1_AS001   | 0.00335  | 0.0216 | 1.61 | up | chr16:16200336-16200840   |
| ASK03267REF               | 0.003936 | 0.0243 | 1.61 | up | ENST00000527688           |
| TI18224REF_TAF1D_AS003    | 0.004495 | 0.0267 | 1.61 | up | chr11:93468854-93468985   |
| TI16036REF_EIF2B5_AS033   | 0.008325 | 0.0396 | 1.61 | up | chr3:184102483-184102601  |
| TI17377REF_MAP3K8_AS001   | 0.015979 | 0.0611 | 1.61 | up | chr10:30724167-30724285   |
| ASK07151REF_PRDM1_AS001   | 0.003286 | 0.0212 | 1.6  | up | chr6:106556513-106556950  |
| TI18485REF_C2orf89_AS004  | 0.004355 | 0.0262 | 1.6  | up | chr2:85097571-85097652    |
| TI17530REF_STEAP3_AS003   | 0.004842 | 0.0283 | 1.6  | up | chr2:119987569-119987700  |
| TI18241REF_TXNRD1_AS001   | 0.005611 | 0.031  | 1.6  | up | chr12:104683383-104683472 |
| TI21532REF_ATP5C1_AS001   | 0.006448 | 0.0339 | 1.6  | up | chr10:7841543-7841669     |
| TI16899REF_KCND3_AS008    | 0.01071  | 0.0468 | 1.6  | up | chr1:112375155-112375249  |
| TI23838REF_OPN1SW_AS001   | 0.010887 | 0.0473 | 1.6  | up | chr7:128412883-128413009  |
| TI18929REF_CAPRIN2_AS003  | 0.011575 | 0.0492 | 1.6  | up | chr12:30868641-30868899   |
| TI16624REF_LGR6_AS003     | 0.03227  | 0.0995 | 1.6  | up | chr1:202188378-202188515  |
| TI18341REF_RABEP1_AS004   | 0.00327  | 0.0212 | 1.59 | up | chr17:5281956-5282062     |
| TI21297REF_S100A7A_AS001  | 0.005006 | 0.0289 | 1.59 | up | chr1:153390171-153390305  |

|                          |          |        |      |    |                           |
|--------------------------|----------|--------|------|----|---------------------------|
| TI17532REF_EPAS1_AS006   | 0.007587 | 0.0374 | 1.59 | up | chr2:46598694-46598805    |
| TI16640REF EIF4G2_AS009  | 0.008848 | 0.0414 | 1.59 | up | chr11:10828198-10828345   |
| TI17481REF_ACBD4_AS003   | 0.009672 | 0.0439 | 1.59 | up | chr17:43217184-43217339   |
| TI17770REF_ATP5B_AS004   | 0.011602 | 0.0492 | 1.59 | up | chr12:57037437-57037536   |
| TI17696REF_SLC30A1_AS002 | 0.01475  | 0.0585 | 1.59 | up | chr1:211746177-211746275  |
| TI16360REF_NFIA_AS009    | 0.014907 | 0.0589 | 1.59 | up | chr1:61588078-61588193    |
| TI16474REF_SRGP2_AS002   | 0.021419 | 0.0747 | 1.59 | up | chr1:206630781-206630925  |
| TI23378REF_CRYGS_AS001   | 0.006495 | 0.0341 | 1.58 | up | chr3:186258810-186258930  |
| NC00249FR                | 0.007374 | 0.0369 | 1.58 | up | FR173272                  |
| TI19863REF_NCR3LG1_AS002 | 0.007633 | 0.0375 | 1.58 | up | chr11:17388640-17388874   |
| TI12885REF               | 0.007871 | 0.0386 | 1.58 | up | ENST00000464888           |
| TI18961REF_SCFD1_AS003   | 0.008112 | 0.0392 | 1.58 | up | chr14:31184212-31184318   |
| TI16064REF_INPP5A_AS028  | 0.018049 | 0.0665 | 1.58 | up | chr10:134352412-134352558 |
| TI18650REF_CPSF1_AS001   | 0.025251 | 0.0837 | 1.58 | up | chr8:145621030-145621177  |
| TI19525REF_RPL8_AS002    | 0.002817 | 0.0191 | 1.57 | up | chr8:146015940-146016045  |
| TI18209REF_RIC8A_AS002   | 0.002909 | 0.0195 | 1.57 | up | chr11:213121-213272       |
| TI17045REF_CTNNA1_AS003  | 0.004172 | 0.0255 | 1.57 | up | chr5:138266811-138267029  |
| TI17841REF_RPAIN_AS003   | 0.004619 | 0.0273 | 1.57 | up | chr17:5331022-5331309     |
| TI18257REF_NAP1L1_AS003  | 0.007551 | 0.0374 | 1.57 | up | chr12:76443192-76443293   |
| TI17215REF_RPS9_AS006    | 0.007895 | 0.0386 | 1.57 | up | chr19:54706510-54706695   |
| TI16267REF_PABPC1L_AS009 | 0.011033 | 0.0478 | 1.57 | up | chr20:43567798-43567934   |
| TI20915REF_BCLAF1_AS001  | 0.017936 | 0.0661 | 1.57 | up | chr6:136592513-136592594  |
| TI18766REF_USP48_AS001   | 0.026161 | 0.0858 | 1.57 | up | chr1:22052645-22052726    |
| TI16933REF_PCID2_AS005   | 0.040256 | 0.118  | 1.57 | up | chr13:113837258-113837428 |
| ASK06571REF_B2M_AS001    | 0.002754 | 0.0188 | 1.56 | up | chr15:45009873-45010302   |
| TI19004REF_TLN2_AS003    | 0.00447  | 0.0267 | 1.56 | up | chr15:63136601-63136724   |
| NC00382FR                | 0.006843 | 0.0353 | 1.56 | up | FR265193                  |
| ASK03447REF              | 0.007485 | 0.0372 | 1.56 | up | ENST00000316848           |
| TI17271REF_RBM5_AS003    | 0.008749 | 0.0411 | 1.56 | up | chr3:50132919-50133069    |
| TI17633REF_MAFK_AS005    | 0.040785 | 0.119  | 1.56 | up | chr7:1576286-1576437      |
| TI17224REF_EEF2_AS001    | 0.041855 | 0.121  | 1.56 | up | chr19:3981626-3981728     |
| TI17528REF_NOP58_AS001   | 0.045815 | 0.129  | 1.56 | up | chr2:203149467-203149590  |
| TI16636REF_DDB2_AS003    | 0.003193 | 0.0209 | 1.55 | up | chr11:47240191-47240283   |
| TI17346REF_GNPAT_AS003   | 0.005999 | 0.0323 | 1.55 | up | chr1:231405718-231405806  |
| TI19357REF_PLCL2_AS002   | 0.009    | 0.0419 | 1.55 | up | chr3:16927844-16927947    |
| NC00516FR                | 0.010724 | 0.0468 | 1.55 | up | FR352059                  |
| TI16307REF_SNX5_AS001    | 0.0124   | 0.0513 | 1.55 | up | chr20:17940249-17940383   |
| TI19751REF_FHL3_AS001    | 0.014584 | 0.058  | 1.55 | up | chr1:38470586-38470739    |
| TI18072REF_ARPC5L_AS004  | 0.01642  | 0.062  | 1.55 | up | chr9:127624251-127624413  |
| TI16929REF_SBNO1_AS008   | 0.02379  | 0.0803 | 1.55 | up | chr12:123774303-123774402 |
| TI22811REF_HAT1_AS001    | 0.024178 | 0.0812 | 1.55 | up | chr2:172779403-172779517  |
| TI18092REF_PPP1R3F_AS004 | 0.025217 | 0.0837 | 1.55 | up | chrX:49131571-49131677    |
| TI18494REF_RBCK1_AS001   | 0.041595 | 0.121  | 1.55 | up | chr20:400943-401122       |
| TI21240REF_MIA3_AS001    | 0.005005 | 0.0289 | 1.54 | up | chr1:222835828-222835989  |
| TI17411REF_HNRNPA1_AS002 | 0.005153 | 0.0296 | 1.54 | up | chr12:54674751-54674841   |
| TI17507REF_SNRNP70_AS005 | 0.005444 | 0.0308 | 1.54 | up | chr19:49609062-49609332   |
| TI16343REF_FBLN1_AS001   | 0.006131 | 0.0328 | 1.54 | up | chr22:45958680-45958790   |
| TI16483REF_DAB1_AS012    | 0.010323 | 0.046  | 1.54 | up | chr1:57735713-57735856    |
| TI20744REF_C3orf56_AS002 | 0.011578 | 0.0492 | 1.54 | up | chr3:126912261-126912424  |
| TI16687REF_TGIF1_AS005   | 0.016403 | 0.062  | 1.54 | up | chr18:3452538-3452624     |
| TI16109REF_MICAL3_AS003  | 0.018325 | 0.0673 | 1.54 | up | chr22:18371849-18371969   |
| TI16531REF_ANXA5_AS002   | 0.038924 | 0.115  | 1.54 | up | chr4:122600163-122600257  |
| TI16578REF_DDX5_AS005    | 0.04867  | 0.134  | 1.54 | up | chr17:62501066-62501438   |
| TI13456REF               | 0.005447 | 0.0308 | 1.53 | up | ENST00000549154           |
| TI16636REF_DDB2_AS001    | 0.006899 | 0.0354 | 1.53 | up | chr11:47256524-47256699   |

|                                |          |        |      |    |                           |
|--------------------------------|----------|--------|------|----|---------------------------|
| TI01454NTNR                    | 0.007199 | 0.0363 | 1.53 | up | NR_040718                 |
| TI19795REF_EIF3A_AS001         | 0.007922 | 0.0386 | 1.53 | up | chr10:120810227-120810403 |
| TI18603REF_PCDH1_AS001         | 0.012473 | 0.0513 | 1.53 | up | chr5:141245672-141245772  |
| TI16541REF_PRDX6_AS002         | 0.01404  | 0.0564 | 1.53 | up | chr1:173449359-173449479  |
| TI16968REF_VPS53_AS007         | 0.015102 | 0.0592 | 1.53 | up | chr17:558104-558199       |
| TI16933REF_PCID2_AS006         | 0.017661 | 0.0652 | 1.53 | up | chr13:113838202-113838326 |
| TI17675REF_ROR1_AS005          | 0.019851 | 0.0714 | 1.53 | up | chr1:64503964-64504065    |
| TI16035REF_MSI2_AS009          | 0.047489 | 0.132  | 1.53 | up | chr17:55750490-55750620   |
| TI08300REF                     | 0.005472 | 0.0308 | 1.52 | up | ENST00000493650           |
| TI20515REF_AGFG1_AS002         | 0.006985 | 0.0357 | 1.52 | up | chr2:228393463-228393551  |
| TI17615REF_BRD9_AS006          | 0.008754 | 0.0411 | 1.52 | up | chr5:865860-865975        |
| TI20702REF_DNAJB11_AS001       | 0.009079 | 0.0421 | 1.52 | up | chr3:186297543-186297655  |
| TI20130REF_PRC1_AS002          | 0.011485 | 0.0491 | 1.52 | up | chr15:91512537-91512664   |
| TI17262REF_hsa-mir-4763_AS002  | 0.013009 | 0.053  | 1.52 | up | chr22:46503634-46503740   |
| TI16779REF_RILPL1_AS009        | 0.015795 | 0.061  | 1.52 | up | chr12:124013345-124013502 |
| TI16933REF_PCID2_AS008         | 0.016857 | 0.0631 | 1.52 | up | chr13:113836159-113836719 |
| TI18242REF_M6PR_AS003          | 0.023878 | 0.0805 | 1.52 | up | chr12:9094569-9094687     |
| TI17913REF_ATP6V1B1_AS002      | 0.029237 | 0.0925 | 1.52 | up | chr2:71187604-71187723    |
| TI17231REF_SLC20A1_AS006       | 0.044578 | 0.126  | 1.52 | up | chr2:113418613-113418709  |
| TI19595REF_THOC2_AS002         | 0.048209 | 0.133  | 1.52 | up | chrX:122754052-122754232  |
| ASK06228REF_SH3D19_AS001       | 0.008991 | 0.0419 | 1.51 | up | chr4:152041843-152041962  |
| TI16652REF_PPP2R5C_AS005       | 0.010627 | 0.0467 | 1.51 | up | chr14:102325129-102325222 |
| TI16530REF_HNRNPD_AS010        | 0.013011 | 0.053  | 1.51 | up | chr4:83280835-83281010    |
| TI17005REF_SS18L1_AS002        | 0.015399 | 0.0597 | 1.51 | up | chr20:60731117-60731259   |
| TI19031REF_TNRC6A_AS002        | 0.016239 | 0.0616 | 1.51 | up | chr16:24831760-24831860   |
| TI17622REF_SHROOM1_AS004       | 0.024324 | 0.0815 | 1.51 | up | chr5:132165186-132165334  |
| TI16922REF_CCDC82_AS006        | 0.030706 | 0.0963 | 1.51 | up | chr11:96118316-96118496   |
| TI17430REF_EVL_AS002           | 0.033886 | 0.103  | 1.51 | up | chr14:100563997-100564120 |
| TI17534REF_PTCD3_AS005         | 0.041844 | 0.121  | 1.51 | up | chr2:86362491-86362639    |
| TI16334REF_RP11-159D12.5_AS001 | 0.048556 | 0.134  | 1.51 | up | chr17:56076958-56077097   |
| TI19381REF_ATP13A3_AS002       | 0.004234 | 0.0257 | 1.5  | up | chr3:194131713-194131857  |
| ASK02951REF                    | 0.009486 | 0.0435 | 1.5  | up | ENST00000481346           |
| TI16042REF_ANKRD11_AS028       | 0.012385 | 0.0513 | 1.5  | up | chr16:89547367-89547528   |
| TI17277REF_PVRL3_AS004         | 0.01265  | 0.0517 | 1.5  | up | chr3:110919634-110919781  |
| TI20787REF_MAN2B2_AS001        | 0.017151 | 0.064  | 1.5  | up | chr4:6592244-6592389      |
| TI17686REF_PRDX1_AS002         | 0.027476 | 0.089  | 1.5  | up | chr1:45982738-45982879    |
| TI19412REF_RPL9_AS003          | 0.0336   | 0.103  | 1.5  | up | chr4:39457430-39457564    |
| TI01382NTNR                    | 0.004553 | 0.027  | 1.49 | up | NR_026878                 |
| ASK06052REF_PCDHGA2_AS000      | 0.005499 | 0.0308 | 1.49 | up | chr5:140891676-140892379  |
| TI18271REF_KHNYN_AS001         | 0.031027 | 0.0971 | 1.49 | up | chr14:24904097-24904246   |
| TI18321REF_IST1_AS002          | 0.034668 | 0.105  | 1.49 | up | chr16:71958508-71958665   |
| TI16959REF_AKAP1_AS002         | 0.043447 | 0.124  | 1.49 | up | chr17:55184566-55184733   |
| ASK07015REF_BARD1_AS001        | 0.045321 | 0.128  | 1.49 | up | chr2:215657141-215657683  |
| TI17277REF_PVRL3_AS006         | 0.006166 | 0.0329 | 1.48 | up | chr3:110919476-110919578  |
| TI18995REF_CAPN3_AS002         | 0.010368 | 0.0461 | 1.48 | up | chr15:42645380-42645462   |
| ASK02612REF                    | 0.011599 | 0.0492 | 1.48 | up | ENST00000482327           |
| TI10663REF                     | 0.018423 | 0.0675 | 1.48 | up | ENST00000483622           |
| TI18058REF_MYC_AS005           | 0.019174 | 0.0695 | 1.48 | up | chr8:128748939-128749049  |
| TI17625REF_GNB2L1_AS002        | 0.019922 | 0.0716 | 1.48 | up | chr5:180665886-180666044  |
| NC00444FR                      | 0.020434 | 0.0729 | 1.48 | up | FR309907                  |
| TI22178REF_KIAA0101_AS001      | 0.02085  | 0.0736 | 1.48 | up | chr15:64665922-64666030   |
| TI17164REF_MAN2C1_AS002        | 0.02101  | 0.074  | 1.48 | up | chr15:75651835-75651940   |
| TI19928REF_COQ10A_AS002        | 0.021111 | 0.074  | 1.48 | up | chr12:56661835-56661926   |
| TI16448REF_GALNT14_AS010       | 0.02412  | 0.0811 | 1.48 | up | chr2:31306721-31306806    |
| TI16908REF_MGEA5_AS001         | 0.029826 | 0.0941 | 1.48 | up | chr10:103553933-103554045 |

|                             |          |        |      |    |                           |
|-----------------------------|----------|--------|------|----|---------------------------|
| TI17750REF_CKAP5_AS001      | 0.031534 | 0.0981 | 1.48 | up | chr11:46776279-46776377   |
| TI16307REF_SNX5_AS013       | 0.038459 | 0.114  | 1.48 | up | chr20:17940095-17940207   |
| TI16864REF_GATS_AS004       | 0.047218 | 0.131  | 1.48 | up | chr7:99812179-99812259    |
| TI17940REF_NCL_AS002        | 0.049662 | 0.135  | 1.48 | up | chr2:232328141-232328243  |
| TI19745REF_SLC26A9_AS001    | 0.007304 | 0.0367 | 1.47 | up | chr1:205907248-205907355  |
| TI17864REF_SNF8_AS004       | 0.011144 | 0.048  | 1.47 | up | chr17:47009097-47009195   |
| TI16540REF_CD46_AS010       | 0.015816 | 0.061  | 1.47 | up | chr1:207942634-207943035  |
| TI20853REF_TNFAIP8_AS001    | 0.017337 | 0.0641 | 1.47 | up | chr5:118686515-118686622  |
| TI21405REF_SUSD4_AS001      | 0.022466 | 0.0771 | 1.47 | up | chr1:223467796-223467901  |
| TI20605REF_UQCC_AS002       | 0.022535 | 0.0772 | 1.47 | up | chr20:33893337-33893458   |
| ASK05967REF_KLF13_AS001     | 0.022645 | 0.0773 | 1.47 | up | chr15:31669408-31669947   |
| TI16673REF_TOM1L1_AS004     | 0.027126 | 0.0884 | 1.47 | up | chr17:53033030-53033185   |
| TI17860REF_GGA3_AS001       | 0.045957 | 0.129  | 1.47 | up | chr17:73238022-73238140   |
| TI19684REF_WARS2_AS002      | 0.008574 | 0.0404 | 1.46 | up | chr1:119627736-119627867  |
| TI24189REF_ZDHHC9_AS001     | 0.011268 | 0.0484 | 1.46 | up | chrX:128974720-128974873  |
| TI16758REF_RCC2_AS009       | 0.015407 | 0.0597 | 1.46 | up | chr1:17736332-17736449    |
| TI19255REF_ODC1_AS002       | 0.016571 | 0.0624 | 1.46 | up | chr2:10586825-10586917    |
| TI18613REF_SOD2_AS002       | 0.017208 | 0.064  | 1.46 | up | chr6:160102047-160102150  |
| TI16327REF_KIF22_AS010      | 0.019358 | 0.0701 | 1.46 | up | chr16:29813784-29813978   |
| TI16309REF_TRA2B_AS002      | 0.023202 | 0.0789 | 1.46 | up | chr3:185650945-185651068  |
| TI17940REF_NCL_AS004        | 0.049055 | 0.134  | 1.46 | up | chr2:232320544-232320700  |
| TI16514REF_PKP4_AS004       | 0.02175  | 0.0756 | 1.45 | up | chr2:159518180-159518283  |
| TI16049REF_DSCAML1_AS033    | 0.024419 | 0.0816 | 1.45 | up | chr11:117381508-117381593 |
| TI12111REF                  | 0.032235 | 0.0995 | 1.45 | up | ENST00000471023           |
| TI19698REF_NGF_AS001        | 0.034427 | 0.104  | 1.45 | up | chr1:115847395-115847486  |
| TI13101REF                  | 0.034477 | 0.105  | 1.45 | up | ENST00000475468           |
| TI16049REF_DSCAML1_AS006    | 0.040507 | 0.118  | 1.45 | up | chr11:117463912-117464032 |
| TI17610REF_SLC7A11_AS003    | 0.043433 | 0.124  | 1.45 | up | chr4:139126718-139126858  |
| TI16307REF_SNX5_AS016       | 0.008548 | 0.0404 | 1.44 | up | chr20:17942662-17942811   |
| TI16640REF_EIF4G2_AS010     | 0.018472 | 0.0675 | 1.44 | up | chr11:10825209-10825310   |
| ASK06729REF_HEATR5A_AS00    | 0.026125 | 0.0858 | 1.44 | up | chr14:31771500-31771739   |
| TI18685REF_LCN6_AS004       | 0.033266 | 0.102  | 1.44 | up | chr9:139640932-139641034  |
| TI17214REF_CALM3_AS002      | 0.033415 | 0.102  | 1.44 | up | chr19:47109131-47109393   |
| TI16309REF_TRA2B_AS006      | 0.038031 | 0.113  | 1.44 | up | chr3:185648929-185649174  |
| ASK04136REF                 | 0.04487  | 0.127  | 1.44 | up | ENST00000489987           |
| TI17947REF_TMEM18_AS003     | 0.010069 | 0.0453 | 1.43 | up | chr2:673144-673325        |
| TI09786REF                  | 0.015037 | 0.0591 | 1.43 | up | ENST00000584906           |
| ASK05332REF_SERPINF1_AS00   | 0.028133 | 0.0899 | 1.43 | up | chr17:1680741-1680865     |
| TI17986REF_ITPR1_AS004      | 0.029961 | 0.0943 | 1.43 | up | chr3:4815263-4815382      |
| ASK06028REF_FOXQ1_AS001     | 0.0389   | 0.115  | 1.43 | up | chr6:1309640-1313530      |
| TI17146REF_GRTP1_AS007      | 0.040542 | 0.118  | 1.43 | up | chr13:113987624-113987747 |
| TI20994REF_KLRG2_AS002      | 0.045241 | 0.128  | 1.43 | up | chr7:139139101-139139235  |
| TI16937REF_MEF2A_AS004      | 0.024397 | 0.0816 | 1.42 | up | chr15:100254256-100254419 |
| TI20676REF_CENPM_AS002      | 0.027668 | 0.0892 | 1.42 | up | chr22:42338060-42338165   |
| TI16053REF_SEPT9_AS036      | 0.028042 | 0.0898 | 1.42 | up | chr17:75402329-75402445   |
| TI16488REF_PHLDB1_AS008     | 0.040289 | 0.118  | 1.42 | up | chr11:118484430-118484523 |
| TI23740REF_TRIM26_AS001     | 0.048922 | 0.134  | 1.42 | up | chr6:30163490-30163587    |
| TI21880REF_LMO3_AS001       | 0.031774 | 0.0986 | 1.41 | up | chr12:16729230-16729320   |
| ASK02165REF                 | 0.041961 | 0.121  | 1.41 | up | ENST00000485153           |
| TI16482REF_IFFO2_AS005      | 0.042933 | 0.123  | 1.41 | up | chr1:19274295-19274424    |
| TI19101REF_DHX33_AS003      | 0.020172 | 0.0722 | 1.4  | up | chr17:5345046-5345181     |
| TI18044REF_CCM2_AS003       | 0.02234  | 0.0768 | 1.4  | up | chr7:45112734-45112840    |
| TI17836REF_RP11-1035H13.3_A | 0.031834 | 0.0986 | 1.4  | up | chr16:18807273-18807369   |
| TI16324REF_SF1_AS006        | 0.041817 | 0.121  | 1.4  | up | chr11:64540300-64540635   |
| TI16047REF_SORCS2_AS036     | 0.044516 | 0.126  | 1.4  | up | chr4:7346482-7346594      |

|                            |          |        |      |      |                           |
|----------------------------|----------|--------|------|------|---------------------------|
| ASK05075REF_LRRC8A_AS001   | 0.015982 | 0.0611 | 1.39 | up   | chr9:131669864-131670208  |
| ASK04490REF                | 0.032754 | 0.101  | 1.39 | up   | ENST00000467706           |
| TI16657REF_RORA_AS003      | 0.043757 | 0.124  | 1.39 | up   | chr15:61477933-61478060   |
| TI16247REF_HNRNPA2B1_AS010 | 0.044907 | 0.127  | 1.39 | up   | chr7:26233088-26233189    |
| TI22342REF_PSMB3_AS001     | 0.028375 | 0.0904 | 1.38 | up   | chr17:36916933-36917032   |
| TI16459REF_ZXDC_AS006      | 0.039918 | 0.117  | 1.38 | up   | chr3:126161148-126161246  |
| ASK05144REF_NEURL1B_AS00   | 0.022294 | 0.0767 | 1.37 | up   | chr5:172117470-172124726  |
| TI19104REF_P2RX1_AS003     | 0.028774 | 0.0913 | 1.37 | up   | chr17:3808739-3808837     |
| TI07767REF                 | 0.029965 | 0.0943 | 1.37 | up   | ENST00000496055           |
| TI21742REF_HYOU1_AS001     | 0.043503 | 0.124  | 1.37 | up   | chr11:118927025-118927186 |
| TI17276REF_ZBTB38_AS003    | 0.044005 | 0.125  | 1.37 | up   | chr3:141052132-141052257  |
| ASK04955REF_SGOL1_AS001    | 0.027066 | 0.0883 | 1.36 | up   | chr3:20215753-20227736    |
| TI17137REF_PTMS_AS004      | 0.030751 | 0.0963 | 1.36 | up   | chr12:6876917-6877096     |
| TI21877REF_C12orf75_AS001  | 0.02574  | 0.085  | 1.35 | up   | chr12:105764406-105764690 |
| TI20878REF_LMAN2_AS002     | 0.028761 | 0.0913 | 1.35 | up   | chr5:176759568-176759658  |
| TI16155REF_CTTN_AS005      | 0.042982 | 0.123  | 1.35 | up   | chr11:70280415-70280551   |
| TI15313REF                 | 0.046308 | 0.13   | 1.35 | up   | ENST00000513162           |
| TI16552REF_UBE2J2_AS011    | 0.044599 | 0.126  | 1.34 | up   | chr1:1197883-1198018      |
| TI16040REF_VAV2_AS006      | 0.048589 | 0.134  | 1.34 | up   | chr9:136803974-136804105  |
| TI16537REF_DOCK5_AS007     | 0.048791 | 0.134  | 1.32 | up   | chr8:25272549-25272693    |
| TI19042REF_C16orf52_AS001  | 0.049806 | 0.136  | 0.75 | down | chr16:22089346-22089441   |
| TI17015REF_RUNX1_AS002     | 0.044906 | 0.127  | 0.74 | down | chr21:36237869-36237968   |
| TI17708REF_KIAA1217_AS003  | 0.022062 | 0.0761 | 0.73 | down | chr10:24833622-24833738   |
| TI18046REF_ABCA13_AS005    | 0.027696 | 0.0892 | 0.73 | down | chr7:48350394-48350485    |
| TI18885REF_PSMA1_AS003     | 0.033288 | 0.102  | 0.73 | down | chr11:14535434-14535704   |
| TI16135REF_TBCD_AS021      | 0.035452 | 0.107  | 0.73 | down | chr17:80764510-80764664   |
| TI17194REF_HDAC5_AS005     | 0.035887 | 0.108  | 0.73 | down | chr17:42187028-42187146   |
| TI16057REF_ZMIZ1_AS007     | 0.036277 | 0.108  | 0.73 | down | chr10:81029305-81029467   |
| TI19435REF_ADAMTS6_AS001   | 0.040911 | 0.119  | 0.73 | down | chr5:64509884-64510033    |
| TI19056REF_CDR2_AS003      | 0.04699  | 0.131  | 0.73 | down | chr16:22432411-22432520   |
| TI17299REF_SREK1_AS006     | 0.014289 | 0.0571 | 0.72 | down | chr5:65461128-65461245    |
| TI16877REF_RASAL2_AS003    | 0.015016 | 0.0591 | 0.72 | down | chr1:178445947-178446129  |
| TI16099REF_KAZN_AS026      | 0.026806 | 0.0878 | 0.72 | down | chr1:15394827-15394937    |
| TI20716REF_MED12L_AS001    | 0.028154 | 0.0899 | 0.72 | down | chr3:150902474-150902568  |
| TI21404REF_INTS7_AS001     | 0.030292 | 0.0951 | 0.72 | down | chr1:212140900-212140988  |
| TI16590REF_NINL_AS008      | 0.031546 | 0.0981 | 0.72 | down | chr20:25524747-25524883   |
| TI16985REF_ZNF638_AS003    | 0.034728 | 0.105  | 0.72 | down | chr2:71574189-71574308    |
| TI16048REF_CUX1_AS034      | 0.037332 | 0.111  | 0.72 | down | chr7:101470078-101470177  |
| TI02008NTNR                | 0.047628 | 0.132  | 0.72 | down | NR_024628                 |
| TI02009NTNR                | 0.047628 | 0.132  | 0.72 | down | NR_024629                 |
| TI02010NTNR                | 0.047628 | 0.132  | 0.72 | down | NR_027708                 |
| TI02011NTNR                | 0.047628 | 0.132  | 0.72 | down | NR_027709                 |
| TI23678REF_SERPINB1_AS001  | 0.048878 | 0.134  | 0.72 | down | chr6:2839793-2839907      |
| TI16169REF_ELL2_AS012      | 0.01353  | 0.0547 | 0.71 | down | chr5:95296832-95296987    |
| TI16666REF_BCARI_AS003     | 0.020681 | 0.0734 | 0.71 | down | chr16:75273016-75273127   |
| TI17183REF_GOSR2_AS006     | 0.023788 | 0.0803 | 0.71 | down | chr17:45047189-45047305   |
| TI19062REF_DEXI_AS003      | 0.026902 | 0.0879 | 0.71 | down | chr16:11034659-11034799   |
| TI18155REF_RAB3B_AS004     | 0.034976 | 0.106  | 0.71 | down | chr1:52456366-52456477    |
| TI01985NTNR                | 0.036759 | 0.11   | 0.71 | down | NR_023359                 |
| TI17338REF_PHKA2_AS005     | 0.042257 | 0.121  | 0.71 | down | chrX:18916472-18916612    |
| TI16638REF_MYO7A_AS004     | 0.011568 | 0.0492 | 0.7  | down | chr11:76900635-76900752   |
| TI20742REF_KBTBD12_AS001   | 0.011958 | 0.0502 | 0.7  | down | chr3:127647437-127647549  |
| TI21134REF_NLGN4X_AS001    | 0.014247 | 0.0571 | 0.7  | down | chrX:6145192-6145286      |
| TI16043REF_CTIF_AS045      | 0.021941 | 0.076  | 0.7  | down | chr18:46383712-46383818   |
| TI16062REF_ADARB2_AS025    | 0.028601 | 0.091  | 0.7  | down | chr10:1334052-1334188     |



|                           |          |        |      |      |                           |
|---------------------------|----------|--------|------|------|---------------------------|
| TI17173REF_PPL_AS005      | 0.03364  | 0.103  | 0.7  | down | chr16:4979197-4979321     |
| TI02002NTNR               | 0.040192 | 0.118  | 0.7  | down | NR_038366                 |
| TI02003NTNR               | 0.040192 | 0.118  | 0.7  | down | NR_038367                 |
| TI19238REF_KCNK3_AS002    | 0.046905 | 0.131  | 0.7  | down | chr2:26932771-26932868    |
| ASK01003NTNR              | 0.049873 | 0.136  | 0.7  | down | NR_037705                 |
| TI17331REF_DENND1A_AS007  | 0.007782 | 0.0382 | 0.69 | down | chr9:126218550-126218661  |
| TI22400REF_SHISA6_AS001   | 0.009575 | 0.0437 | 0.69 | down | chr17:11146400-11146513   |
| TI16635REF_FRMD4A_AS002   | 0.011336 | 0.0486 | 0.69 | down | chr10:13721864-13721994   |
| TI02082NTNR               | 0.012161 | 0.0507 | 0.69 | down | XR_109464                 |
| TI17427REF_WDR20_AS002    | 0.014134 | 0.0567 | 0.69 | down | chr14:102684592-102684715 |
| TI16196REF_SPG7_AS019     | 0.01593  | 0.0611 | 0.69 | down | chr16:89588742-89589093   |
| TI17814REF_PMM2_AS001     | 0.019053 | 0.0692 | 0.69 | down | chr16:8926616-8926719     |
| TI16112REF_BCAR3_AS003    | 0.020462 | 0.0729 | 0.69 | down | chr1:94119491-94119643    |
| TI16481REF_SSU72_AS007    | 0.026038 | 0.0856 | 0.69 | down | chr1:1496780-1496939      |
| TI23721REF_FAXC_AS001     | 0.027146 | 0.0884 | 0.69 | down | chr6:99763928-99764008    |
| ASK06292REF_NDUFV3_AS001  | 0.028321 | 0.0903 | 0.69 | down | chr21:44322448-44322831   |
| TI17570REF_ZDHHC8_AS003   | 0.029459 | 0.093  | 0.69 | down | chr22:20129867-20129976   |
| TI16637REF_FADS2_AS004    | 0.032847 | 0.101  | 0.69 | down | chr11:61606234-61606376   |
| TI17229REF_GLS_AS005      | 0.035204 | 0.106  | 0.69 | down | chr2:191790756-191790890  |
| TI16357REF_BCAN_AS009     | 0.036982 | 0.11   | 0.69 | down | chr1:156615684-156615835  |
| TI16121REF_NPAS2_AS014    | 0.039251 | 0.116  | 0.69 | down | chr2:101605479-101605575  |
| TI17011REF_TRPM2_AS003    | 0.040475 | 0.118  | 0.69 | down | chr21:45853286-45853383   |
| ASK01037NTNR              | 0.041159 | 0.119  | 0.69 | down | NR_038246                 |
| TI17473REF_THRA_AS004     | 0.04283  | 0.123  | 0.69 | down | chr17:38223441-38223569   |
| TI19398REF_ANK2_AS002     | 0.006611 | 0.0344 | 0.68 | down | chr4:113937611-113937715  |
| TI21211REF_FNBPI1_AS001   | 0.009342 | 0.043  | 0.68 | down | chr1:93913716-93913833    |
| TI16445REF_THADA_AS004    | 0.011034 | 0.0478 | 0.68 | down | chr2:43420190-43420354    |
| TI23224REF_NKTR_AS001     | 0.012515 | 0.0513 | 0.68 | down | chr3:42686286-42686417    |
| TI16367REF_TCF7L2_AS007   | 0.014925 | 0.0589 | 0.68 | down | chr10:114805286-114805383 |
| ASK05798REF_HNRNPF_AS001  | 0.018213 | 0.067  | 0.68 | down | chr10:43881139-43881486   |
| TI16781REF_ACIN1_AS001    | 0.020066 | 0.072  | 0.68 | down | chr14:23534231-23534333   |
| TI16357REF_BCAN_AS004     | 0.025908 | 0.0853 | 0.68 | down | chr1:156613514-156613833  |
| TI18665REF_SNAPC3_AS001   | 0.031635 | 0.0983 | 0.68 | down | chr9:15462331-15462599    |
| ASK05401REF_NAA30_AS001   | 0.035965 | 0.108  | 0.68 | down | chr14:57857556-57857939   |
| TI16246REF_GTF2IRD1_AS010 | 0.040648 | 0.118  | 0.68 | down | chr7:74012982-74013084    |
| TI19694REF_RAB3GAP2_AS001 | 0.049603 | 0.135  | 0.68 | down | chr1:220323209-220323351  |
| TI19584REF_SAT1_AS001     | 0.008239 | 0.0395 | 0.67 | down | chrX:23802735-23803405    |
| ASK05690REF_CHSY1_AS001   | 0.013875 | 0.0558 | 0.67 | down | chr15:101716152-101716603 |
| TI16772REF_IFITM10_AS005  | 0.015186 | 0.0593 | 0.67 | down | chr11:1771549-1771650     |
| ASK04968REF_MEOX2_AS001   | 0.015206 | 0.0593 | 0.67 | down | chr7:15718652-15721463    |
| TI16525REF_CCDC50_AS011   | 0.016208 | 0.0616 | 0.67 | down | chr3:191112665-191112758  |
| TI16507REF_BRCA1_AS006    | 0.025799 | 0.0851 | 0.67 | down | chr17:41295801-41295903   |
| TI16452REF_SHANK3_AS012   | 0.025924 | 0.0853 | 0.67 | down | chr22:51162740-51162837   |
| ASK06309REF_BACE2_AS001   | 0.027759 | 0.0893 | 0.67 | down | chr21:42537369-42540491   |
| TI17171REF_VAC14_AS002    | 0.028042 | 0.0898 | 0.67 | down | chr16:70752548-70752697   |
| TI18328REF_TMEM8A_AS001   | 0.031289 | 0.0976 | 0.67 | down | chr16:428585-428738       |
| TI16893REF_ENSA_AS006     | 0.036324 | 0.108  | 0.67 | down | chr1:150592545-150592661  |
| TI16087REF_HDLBP_AS015    | 0.038516 | 0.114  | 0.67 | down | chr2:242201224-242201318  |
| TI16638REF_MYO7A_AS010    | 0.04039  | 0.118  | 0.67 | down | chr11:76901927-76902058   |
| TI22258REF_ACD_AS001      | 0.009691 | 0.0439 | 0.66 | down | chr16:67693168-67693261   |
| TI16702REF_SESTD1_AS001   | 0.010402 | 0.0461 | 0.66 | down | chr2:179967836-179968070  |
| TI17829REF_DYNC1L12_AS004 | 0.011444 | 0.049  | 0.66 | down | chr16:66764324-66765250   |
| NC00039FR                 | 0.011941 | 0.0502 | 0.66 | down | FR020479                  |
| TI16750REF_DDI2_AS002     | 0.012045 | 0.0505 | 0.66 | down | chr1:15991912-15992022    |
| TI16545REF_MAPKAPK2_AS002 | 0.01214  | 0.0507 | 0.66 | down | chr1:206877102-206877204  |

|                             |          |        |      |      |                           |
|-----------------------------|----------|--------|------|------|---------------------------|
| TI16362REF_PABPC4_AS012     | 0.015044 | 0.0591 | 0.66 | down | chr1:40034127-40034265    |
| TI18825REF_RBM20_AS003      | 0.015592 | 0.0604 | 0.66 | down | chr10:112455174-112455308 |
| TI16216REF_TIA1_AS015       | 0.016201 | 0.0616 | 0.66 | down | chr2:70455378-70455469    |
| TI17623REF_TMEM167A_AS006   | 0.020419 | 0.0729 | 0.66 | down | chr5:82350697-82350944    |
| ASK00784NTNR                | 0.022004 | 0.0761 | 0.66 | down | NR_038289                 |
| TI22936REF_LYG1_AS001       | 0.022478 | 0.0771 | 0.66 | down | chr2:99919922-99920018    |
| TI16361REF_SLC35F3_AS011    | 0.02907  | 0.0921 | 0.66 | down | chr1:234359024-234359107  |
| TI17457REF_ZC3H18_AS001     | 0.032748 | 0.101  | 0.66 | down | chr16:88646975-88647116   |
| TI24057REF_MED22_AS001      | 0.034152 | 0.104  | 0.66 | down | chr9:136213839-136213986  |
| TI16864REF_GATS_AS005       | 0.037367 | 0.111  | 0.66 | down | chr7:99813141-99813261    |
| TI13722REF                  | 0.041805 | 0.121  | 0.66 | down | ENST00000558649           |
| TI16190REF_LRP5_AS007       | 0.045887 | 0.129  | 0.66 | down | chr11:68156396-68156557   |
| TI22696REF_SLC8A2_AS001     | 0.049262 | 0.135  | 0.66 | down | chr19:47963116-47963207   |
| TI16703REF_GFPT1_AS006      | 0.003875 | 0.024  | 0.65 | down | chr2:69548052-69548145    |
| TI17476REF_MINK1_AS004      | 0.004676 | 0.0276 | 0.65 | down | chr17:4754768-4754931     |
| TI16751REF_TARBP1_AS001     | 0.009081 | 0.0421 | 0.65 | down | chr1:234543747-234543929  |
| TI18883REF_PITPNM1_AS002    | 0.009637 | 0.0439 | 0.65 | down | chr11:67268088-67268191   |
| TI16393REF_PXDN_AS014       | 0.01244  | 0.0513 | 0.65 | down | chr2:1666387-1666518      |
| TI20368REF_PRMT1_AS001      | 0.014552 | 0.0579 | 0.65 | down | chr19:50188436-50188573   |
| TI16116REF_ANKRD10_AS007    | 0.014619 | 0.058  | 0.65 | down | chr13:111547972-111548108 |
| ASK06267REF_CELF2_AS001     | 0.015211 | 0.0593 | 0.65 | down | chr10:11375343-11375872   |
| TI18583REF_ZNF827_AS001     | 0.015871 | 0.0611 | 0.65 | down | chr4:146681458-146681556  |
| TI18505REF_CDH22_AS002      | 0.016751 | 0.0628 | 0.65 | down | chr20:44926556-44926659   |
| TI16038REF_CELF4_AS035      | 0.017156 | 0.064  | 0.65 | down | chr18:35125498-35125612   |
| TI16215REF_SPEG_AS008       | 0.017189 | 0.064  | 0.65 | down | chr2:220356925-220357033  |
| TI20338REF_RNF152_AS002     | 0.020581 | 0.0732 | 0.65 | down | chr18:59538022-59538124   |
| TI18859REF_SIDT2_AS003      | 0.021362 | 0.0746 | 0.65 | down | chr11:117062743-117062831 |
| TI17068REF_RC3H2_AS007      | 0.022152 | 0.0763 | 0.65 | down | chr9:125607848-125608105  |
| TI17790REF_C14orf166B_AS005 | 0.027564 | 0.0891 | 0.65 | down | chr14:77317462-77317580   |
| ASK03582REF                 | 0.031975 | 0.0988 | 0.65 | down | ENST00000573505           |
| TI16865REF_ST3GAL1_AS002    | 0.001963 | 0.015  | 0.64 | down | chr8:134469071-134469269  |
| TI16137REF_LPP_AS011        | 0.002524 | 0.0175 | 0.64 | down | chr3:188603087-188603263  |
| TI17175REF_EMP2_AS004       | 0.004192 | 0.0256 | 0.64 | down | chr16:10623914-10624024   |
| ASK03493REF                 | 0.00436  | 0.0262 | 0.64 | down | ENST00000568073           |
| TI16994REF_LIMS1_AS003      | 0.005683 | 0.0312 | 0.64 | down | chr2:109301309-109301511  |
| TI16924REF_ETV6_AS006       | 0.007547 | 0.0374 | 0.64 | down | chr12:11867154-11867292   |
| TI16046REF_KCNQ1_AS007      | 0.010412 | 0.0461 | 0.64 | down | chr11:2752952-2753064     |
| ASK02877REF                 | 0.011859 | 0.0501 | 0.64 | down | ENST00000486089           |
| TI17355REF_PPPIA4_AS005     | 0.012475 | 0.0513 | 0.64 | down | chr1:203020183-203020288  |
| TI16781REF_ACIN1_AS009      | 0.018628 | 0.0679 | 0.64 | down | chr14:23534838-23535040   |
| TI16186REF_PRRC2B_AS009     | 0.0218   | 0.0756 | 0.64 | down | chr9:134366492-134366777  |
| TI17369REF_TNNI1_AS006      | 0.024545 | 0.0819 | 0.64 | down | chr1:201388755-201388867  |
| TI16531REF_ANXA5_AS009      | 0.031926 | 0.0988 | 0.64 | down | chr4:122600458-122600613  |
| TI16682REF_P4HB_AS001       | 0.047624 | 0.132  | 0.64 | down | chr17:79817676-79817833   |
| TI16153REF_ELK4_AS011       | 0.048089 | 0.133  | 0.64 | down | chr1:205577737-205577872  |
| TI12849REF                  | 0.048236 | 0.133  | 0.64 | down | ENST00000469401           |
| TI20126REF_WDR73_AS002      | 0.001361 | 0.0117 | 0.63 | down | chr15:85189076-85189191   |
| TI17736REF_SPON1_AS005      | 0.001518 | 0.0127 | 0.63 | down | chr11:14253990-14254085   |
| TI17056REF_SUN1_AS003       | 0.002627 | 0.018  | 0.63 | down | chr7:892309-892447        |
| TI10260REF                  | 0.003233 | 0.0211 | 0.63 | down | ENST00000515753           |
| TI17127REF_PIK3C2A_AS006    | 0.004419 | 0.0265 | 0.63 | down | chr11:17110253-17110371   |
| ASK03897REF                 | 0.004973 | 0.0289 | 0.63 | down | ENST00000483795           |
| TI17567REF_PTTG1IP_AS005    | 0.005708 | 0.0313 | 0.63 | down | chr21:46284837-46284991   |
| TI23982REF_DNAJA1_AS001     | 0.005753 | 0.0314 | 0.63 | down | chr9:33039313-33039439    |
| TI19505REF_DDHD2_AS003      | 0.005983 | 0.0323 | 0.63 | down | chr8:38119161-38119409    |

|                              |          |         |      |      |                           |
|------------------------------|----------|---------|------|------|---------------------------|
| TI17086REF_CHD1L_AS007       | 0.00621  | 0.0331  | 0.63 | down | chr1:146741932-146742109  |
| TI17070REF_SH3GLB2_AS002     | 0.007425 | 0.037   | 0.63 | down | chr9:131775443-131775635  |
| TI18508REF_BCL2L1_AS004      | 0.008157 | 0.0392  | 0.63 | down | chr20:30273771-30273900   |
| TI16124REF_ANKRD52_AS011     | 0.009552 | 0.0436  | 0.63 | down | chr12:56632840-56632980   |
| TI22849REF_CCDC104_AS001     | 0.010075 | 0.0453  | 0.63 | down | chr2:55757626-55757813    |
| TI20704REF_XYLB_AS001        | 0.014275 | 0.0571  | 0.63 | down | chr3:38413941-38414117    |
| TI19312REF_PKNOX1_AS002      | 0.017302 | 0.0641  | 0.63 | down | chr21:44413316-44413409   |
| TI16178REF_ASPSCR1_AS006     | 0.020791 | 0.0735  | 0.63 | down | chr17:79972207-79972306   |
| TI17948REF_XDH_AS003         | 0.020797 | 0.0735  | 0.63 | down | chr2:31584315-31584418    |
| TI20062REF_CDH24_AS002       | 0.021084 | 0.074   | 0.63 | down | chr14:23520223-23520344   |
| TI17096REF_CDK11A_AS004      | 0.022725 | 0.0775  | 0.63 | down | chr1:1646727-1646893      |
| TI16574REF_UNKL_AS011        | 0.023938 | 0.0806  | 0.63 | down | chr16:1428264-1428441     |
| TI17670REF_SMYD2_AS001       | 0.048789 | 0.134   | 0.63 | down | chr1:214500648-214500814  |
| TI16074REF_GNAS_AS035        | 0.000699 | 0.00718 | 0.62 | down | chr20:57469892-57470071   |
| TI17356REF_RNF207_AS004      | 0.002089 | 0.0156  | 0.62 | down | chr1:6272600-6272733      |
| TI19481REF_ZNF789_AS001      | 0.003182 | 0.0209  | 0.62 | down | chr7:99078146-99078449    |
| TI16349REF_GSK3B_AS001       | 0.003712 | 0.0233  | 0.62 | down | chr3:119541316-119541418  |
| TI16750REF_DDI2_AS008        | 0.003866 | 0.024   | 0.62 | down | chr1:15994255-15994364    |
| TI18759REF_RP4-758J18.2_AS00 | 0.005564 | 0.0309  | 0.62 | down | chr1:1335859-1336248      |
| TI17316REF_KIAA1549_AS006    | 0.005955 | 0.0323  | 0.62 | down | chr7:138579126-138579217  |
| TI17539REF_ANKZF1_AS002      | 0.005971 | 0.0323  | 0.62 | down | chr2:220097411-220097561  |
| TI16353REF_NHSL1_AS013       | 0.006863 | 0.0353  | 0.62 | down | chr6:138744611-138744745  |
| TI16854REF_PHF10_AS002       | 0.007395 | 0.0369  | 0.62 | down | chr6:170108789-170109020  |
| TI17948REF_XDH_AS005         | 0.008316 | 0.0396  | 0.62 | down | chr2:31584444-31584554    |
| ASK07206REF_LTBP2_AS001      | 0.008504 | 0.0402  | 0.62 | down | chr14:75018884-75026726   |
| TI16212REF_ABCC3_AS002       | 0.009145 | 0.0423  | 0.62 | down | chr17:48740138-48740481   |
| TI18308REF_EDC4_AS002        | 0.009526 | 0.0436  | 0.62 | down | chr16:67909085-67909178   |
| ASK04637REF                  | 0.009898 | 0.0447  | 0.62 | down | ENST00000489062           |
| TI23211REF_CRYBG3_AS001      | 0.010701 | 0.0468  | 0.62 | down | chr3:97654621-97654731    |
| TI16087REF_HDLBP_AS003       | 0.011796 | 0.0499  | 0.62 | down | chr2:242173394-242173474  |
| TI16045REF_GRID1_AS020       | 0.015314 | 0.0595  | 0.62 | down | chr10:87675548-87675719   |
| TI21477REF_TAF13_AS001       | 0.016671 | 0.0626  | 0.62 | down | chr1:109606885-109606989  |
| TI16993REF_ANTXR1_AS005      | 0.020143 | 0.0722  | 0.62 | down | chr2:69442063-69442197    |
| TI16214REF_ENOSF1_AS016      | 0.022613 | 0.0773  | 0.62 | down | chr18:693167-693297       |
| TI16754REF_NPHP4_AS001       | 0.02519  | 0.0837  | 0.62 | down | chr1:6050069-6050211      |
| TI16190REF_LRP5_AS013        | 0.034635 | 0.105   | 0.62 | down | chr11:68156843-68157017   |
| TI16778REF_RSRC2_AS005       | 0.041916 | 0.121   | 0.62 | down | chr12:123005223-123005428 |
| TI18856REF_YAP1_AS003        | 0.04213  | 0.121   | 0.62 | down | chr11:102056065-102056184 |
| TI16224REF_NUCKS1_AS016      | 0.001459 | 0.0123  | 0.61 | down | chr1:205684278-205684442  |
| TI17612REF_ZSWIM6_AS001      | 0.002173 | 0.0159  | 0.61 | down | chr5:60835429-60835551    |
| ASK02798REF                  | 0.002401 | 0.0169  | 0.61 | down | ENST00000530448           |
| TI13060REF                   | 0.002938 | 0.0196  | 0.61 | down | ENST00000473643           |
| TI16059REF_RBM39_AS033       | 0.003783 | 0.0236  | 0.61 | down | chr20:34317970-34318143   |
| TI13698REF                   | 0.007345 | 0.0368  | 0.61 | down | ENST00000556524           |
| TI16556REF_SORL1_AS002       | 0.008256 | 0.0395  | 0.61 | down | chr11:121501260-121501814 |
| TI16040REF_VAV2_AS024        | 0.012153 | 0.0507  | 0.61 | down | chr9:136669707-136669804  |
| TI21971REF_ZMYM2_AS001       | 0.016014 | 0.0611  | 0.61 | down | chr13:20533689-20533785   |
| TI19515REF_EPB49_AS001       | 0.018885 | 0.0688  | 0.61 | down | chr8:21913143-21913272    |
| TI01682NTNR                  | 0.019691 | 0.0709  | 0.61 | down | XR_108725                 |
| TI01683NTNR                  | 0.019691 | 0.0709  | 0.61 | down | XR_110624                 |
| TI01684NTNR                  | 0.019691 | 0.0709  | 0.61 | down | XR_112964                 |
| TI18518REF_MCM3AP_AS002      | 0.021217 | 0.0742  | 0.61 | down | chr21:47663186-47663292   |
| TI16482REF_IFFO2_AS006       | 0.022953 | 0.0782  | 0.61 | down | chr1:19251756-19251837    |
| TI16330REF_RP11-31I10.4_AS00 | 0.027909 | 0.0896  | 0.61 | down | chr16:1831236-1831341     |
| TI16034REF_FNDC3B_AS005      | 0.028108 | 0.0899  | 0.61 | down | chr3:171768591-171768724  |

|                               |          |         |      |      |                           |
|-------------------------------|----------|---------|------|------|---------------------------|
| TI16216REF_TIA1_AS001         | 0.031398 | 0.0979  | 0.61 | down | chr2:70455081-70455177    |
| TI13945REF                    | 0.033534 | 0.103   | 0.61 | down | ENST00000561853           |
| TI16038REF_CELF4_AS015        | 0.033696 | 0.103   | 0.61 | down | chr18:34943775-34943895   |
| TI17205REF_DSG2_AS005         | 0.041718 | 0.121   | 0.61 | down | chr18:29128405-29128668   |
| TI18662REF_UGCG_AS004         | 0.000966 | 0.00911 | 0.6  | down | chr9:114696664-114696830  |
| TI17921REF_SSFA2_AS001        | 0.00173  | 0.0139  | 0.6  | down | chr2:182782269-182782464  |
| ASK05115REF_CDCP1_AS001       | 0.001761 | 0.0141  | 0.6  | down | chr3:45123770-45124005    |
| ASK06289REF_CDON_AS001        | 0.00186  | 0.0145  | 0.6  | down | chr11:125827797-125828423 |
| TI19498REF_TMED4_AS003        | 0.002581 | 0.0177  | 0.6  | down | chr7:44617632-44617838    |
| TI16073REF_NFE2L2_AS013       | 0.003051 | 0.0202  | 0.6  | down | chr2:178099036-178099160  |
| TI16621REF_GABRE_AS003        | 0.003425 | 0.0218  | 0.6  | down | chrX:151124502-151125414  |
| TI16769REF_RPL27A_AS003       | 0.003725 | 0.0233  | 0.6  | down | chr11:8709643-8709788     |
| TI18783REF_ENAH_AS002         | 0.0064   | 0.0338  | 0.6  | down | chr1:225832698-225832788  |
| ASK04747REF_COPS3_AS001       | 0.007352 | 0.0368  | 0.6  | down | chr17:17146620-17150455   |
| ASK06756REF_LRBA_AS001        | 0.007618 | 0.0375  | 0.6  | down | chr4:151500778-151502419  |
| ASK05891REF_USP25_AS001       | 0.007995 | 0.0388  | 0.6  | down | chr21:17250920-17251178   |
| TI16305REF_NTSR1_AS009        | 0.01114  | 0.048   | 0.6  | down | chr20:61373062-61373171   |
| TI16795REF_IPT140_AS003       | 0.012492 | 0.0513  | 0.6  | down | chr16:1561623-1561749     |
| TI16096REF_CTBP1_AS019        | 0.018459 | 0.0675  | 0.6  | down | chr4:1236619-1237077      |
| TI17291REF_FAM160A1_AS006     | 0.020617 | 0.0733  | 0.6  | down | chr4:152584220-152584381  |
| TI17057REF_PON2_AS002         | 0.020768 | 0.0735  | 0.6  | down | chr7:95043755-95043863    |
| ASK05773REF_DTWD2_AS001       | 0.023339 | 0.0792  | 0.6  | down | chr5:118173046-118173366  |
| TI18049REF_KCTD7_AS003        | 0.029405 | 0.093   | 0.6  | down | chr7:66106848-66107023    |
| TI16247REF_HNRNPA2B1_AS010    | 0.031067 | 0.0971  | 0.6  | down | chr7:26229812-26229929    |
| TI16112REF_BCAR3_AS005        | 0.045971 | 0.129   | 0.6  | down | chr1:94230048-94230135    |
| TI18595REF_RP11-428C6.1_AS000 | 0.000367 | 0.00457 | 0.59 | down | chr5:73116394-73116501    |
| TI16308REF_SON_AS014          | 0.000654 | 0.00696 | 0.59 | down | chr21:34943878-34943992   |
| ASK06490REF_HEXIM1_AS001      | 0.001104 | 0.01    | 0.59 | down | chr17:43227786-43228268   |
| TI16418REF_NAV2_AS005         | 0.001754 | 0.0141  | 0.59 | down | chr11:19719523-19719689   |
| TI01691NTNR                   | 0.001939 | 0.0149  | 0.59 | down | XR_110494                 |
| TI16395REF_SIK1_AS012         | 0.002891 | 0.0195  | 0.59 | down | chr21:44845152-44845285   |
| TI19449REF_SERINC5_AS002      | 0.00324  | 0.0211  | 0.59 | down | chr5:79438327-79438419    |
| TI17533REF_INSIG2_AS003       | 0.00424  | 0.0257  | 0.59 | down | chr2:118863265-118863362  |
| TI16134REF_FARP1_AS007        | 0.004989 | 0.0289  | 0.59 | down | chr13:99058521-99058804   |
| TI20642REF_DONSON_AS002       | 0.009706 | 0.0439  | 0.59 | down | chr21:34954366-34954454   |
| TI19071REF_TUBG2_AS003        | 0.010235 | 0.0457  | 0.59 | down | chr17:40815245-40815376   |
| TI17587REF_PXK_AS003          | 0.011056 | 0.0478  | 0.59 | down | chr3:58409580-58409690    |
| TI17709REF_REEP3_AS001        | 0.011911 | 0.0502  | 0.59 | down | chr10:65383580-65383667   |
| TI19067REF_ERI2_AS002         | 0.013386 | 0.0544  | 0.59 | down | chr16:20878524-20878639   |
| TI16354REF_PLXNA4_AS001       | 0.014352 | 0.0572  | 0.59 | down | chr7:131850556-131850646  |
| TI19848REF_ANKK1_AS002        | 0.025315 | 0.0837  | 0.59 | down | chr11:113266313-113266442 |
| TI16273REF_HMGXB3_AS009       | 0.037489 | 0.111   | 0.59 | down | chr5:149432293-149432451  |
| TI17606REF_RBPJ_AS002         | 0.000251 | 0.00348 | 0.58 | down | chr4:26434258-26434969    |
| TI16606REF_STC2_AS008         | 0.000265 | 0.00366 | 0.58 | down | chr5:172746377-172746475  |
| TI16134REF_FARP1_AS014        | 0.000479 | 0.00557 | 0.58 | down | chr13:99058259-99058464   |
| NC00496FR                     | 0.000522 | 0.00596 | 0.58 | down | FR340981                  |
| TI16968REF_VPS53_AS003        | 0.000621 | 0.00672 | 0.58 | down | chr17:421611-421768       |
| TI16308REF_SON_AS004          | 0.001033 | 0.00951 | 0.58 | down | chr21:34941474-34941588   |
| TI19642REF_PRKAA2_AS002       | 0.001537 | 0.0128  | 0.58 | down | chr1:57177030-57177143    |
| TI18610REF_TFB1M_AS001        | 0.001699 | 0.0138  | 0.58 | down | chr6:155583434-155583652  |
| TI16137REF_LPP_AS016          | 0.002175 | 0.0159  | 0.58 | down | chr3:188598489-188598633  |
| TI18662REF_UGCG_AS001         | 0.002269 | 0.0162  | 0.58 | down | chr9:114695598-114695818  |
| TI16994REF_LIMS1_AS002        | 0.002496 | 0.0174  | 0.58 | down | chr2:109302131-109302220  |
| TI16989REF_NAB1_AS002         | 0.002574 | 0.0177  | 0.58 | down | chr2:191522408-191522524  |
| TI16315REF_XKR6_AS014         | 0.002934 | 0.0196  | 0.58 | down | chr8:10876413-10876515    |

|                            |          |         |      |      |                           |
|----------------------------|----------|---------|------|------|---------------------------|
| TI16035REF_MSI2_AS014      | 0.003877 | 0.024   | 0.58 | down | chr17:55758469-55758566   |
| TI16308REF_SON_AS005       | 0.004011 | 0.0246  | 0.58 | down | chr21:34943022-34943194   |
| TI16071REF_GALNT2_AS010    | 0.00551  | 0.0308  | 0.58 | down | chr1:230399934-230400109  |
| TI16854REF_PHF10_AS001     | 0.005558 | 0.0309  | 0.58 | down | chr6:170109303-170109581  |
| TI17018REF_DESI1_AS001     | 0.005682 | 0.0312  | 0.58 | down | chr22:41997480-41997685   |
| TI16196REF_SPG7_AS004      | 0.012497 | 0.0513  | 0.58 | down | chr16:89584441-89584926   |
| NC00364FR                  | 0.016599 | 0.0624  | 0.58 | down | FR251069                  |
| TI16160REF_TBC1D16_AS017   | 0.000319 | 0.00419 | 0.57 | down | chr17:77910764-77910901   |
| TI17921REF_SSFA2_AS004     | 0.000362 | 0.00457 | 0.57 | down | chr2:182781959-182782235  |
| TI17478REF_TANC2_AS001     | 0.000547 | 0.0061  | 0.57 | down | chr17:61501768-61501887   |
| TI01632NTNR                | 0.001283 | 0.0112  | 0.57 | down | NR_040093                 |
| TI12031REF                 | 0.001297 | 0.0113  | 0.57 | down | ENST00000462712           |
| TI17329REF_C9orf3_AS003    | 0.001466 | 0.0123  | 0.57 | down | chr9:97770111-97770227    |
| TI18051REF_LAMB1_AS004     | 0.001475 | 0.0124  | 0.57 | down | chr7:107585861-107585977  |
| TI23882REF_SGK3_AS001      | 0.002802 | 0.0191  | 0.57 | down | chr8:67589578-67589706    |
| TI16111REF_TMEM181_AS003   | 0.003401 | 0.0217  | 0.57 | down | chr6:159055243-159055398  |
| ASK04922REF_JAM2_AS001     | 0.005234 | 0.0299  | 0.57 | down | chr21:27086986-27087172   |
| ASK06939REF_CDH2_AS001     | 0.005656 | 0.0312  | 0.57 | down | chr18:25530941-25531105   |
| TI16134REF_FARP1_AS010     | 0.005745 | 0.0314  | 0.57 | down | chr13:99050012-99050128   |
| TI21992REF_MIPEP_AS001     | 0.007271 | 0.0366  | 0.57 | down | chr13:24425079-24425187   |
| TI19072REF_VMP1_AS003      | 0.010195 | 0.0456  | 0.57 | down | chr17:57916099-57916215   |
| TI16709REF_U2AF1_AS007     | 0.011255 | 0.0484  | 0.57 | down | chr21:44513765-44513912   |
| TI18499REF_FAM65C_AS002    | 0.012448 | 0.0513  | 0.57 | down | chr20:49242557-49242689   |
| TI16121REF_NPAS2_AS013     | 0.013458 | 0.0546  | 0.57 | down | chr2:101502951-101503042  |
| TI21542REF_PPP2R2D_AS001   | 0.016562 | 0.0624  | 0.57 | down | chr10:133770164-133770284 |
| TI23209REF_EXOSC7_AS001    | 0.019004 | 0.0691  | 0.57 | down | chr3:45043604-45043727    |
| TI16473REF_MSTO1_AS005     | 0.024951 | 0.0831  | 0.57 | down | chr1:155585766-155586074  |
| TI22048REF_TNFAIP2_AS001   | 0.02527  | 0.0837  | 0.57 | down | chr14:103596945-103597064 |
| ASK05227REF_NRIP1_AS002    | 0.000234 | 0.00326 | 0.56 | down | chr21:16336570-16337036   |
| TI16080REF_MPRIP_AS011     | 0.000459 | 0.00541 | 0.56 | down | chr17:17089522-17089622   |
| TI16861REF_HIPK2_AS005     | 0.00056  | 0.00621 | 0.56 | down | chr7:139248969-139249140  |
| TI22002REF_EFNB2_AS001     | 0.000606 | 0.00659 | 0.56 | down | chr13:107171013-107171124 |
| TI16261REF_KIAA0182_AS007  | 0.00064  | 0.00684 | 0.56 | down | chr16:85650716-85650842   |
| TI18833REF_HERC4_AS002     | 0.000697 | 0.00718 | 0.56 | down | chr10:69833498-69833592   |
| TI16134REF_FARP1_AS005     | 0.000728 | 0.00737 | 0.56 | down | chr13:99059096-99059450   |
| ASK05238REF_DMAP1_AS002    | 0.000921 | 0.00887 | 0.56 | down | chr1:44683967-44684296    |
| TI16525REF_CCDC50_AS010    | 0.001364 | 0.0117  | 0.56 | down | chr3:191112880-191113031  |
| TI16169REF_ELL2_AS017      | 0.001828 | 0.0144  | 0.56 | down | chr5:95221060-95221164    |
| TI20841REF_RAI14_AS002     | 0.001935 | 0.0149  | 0.56 | down | chr5:34771370-34771481    |
| ASK03574REF                | 0.004535 | 0.0269  | 0.56 | down | ENST00000532936           |
| TI17624REF_EFNA5_AS002     | 0.009426 | 0.0433  | 0.56 | down | chr5:106881942-106882044  |
| TI01927NTNR                | 0.010884 | 0.0473  | 0.56 | down | NR_027696                 |
| TI01928NTNR                | 0.010884 | 0.0473  | 0.56 | down | NR_027697                 |
| ASK04750REF_TP53INP2_AS001 | 0.030068 | 0.0945  | 0.56 | down | chr20:33298065-33298214   |
| TI16126REF_HNRNPC_AS014    | 0.000106 | 0.00203 | 0.55 | down | chr14:21717074-21717212   |
| TI16160REF_TBC1D16_AS018   | 0.000155 | 0.00258 | 0.55 | down | chr17:77907962-77908081   |
| ASK05571REF_SERPINE2_AS00  | 0.000158 | 0.00258 | 0.55 | down | chr2:224839928-224840556  |
| TI16606REF_STC2_AS001      | 0.00022  | 0.0032  | 0.55 | down | chr5:172749016-172749250  |
| TI16344REF_KIAA1671_AS006  | 0.000306 | 0.00408 | 0.55 | down | chr22:25592028-25592195   |
| ASK04952REF_HOXB7_AS001    | 0.000526 | 0.00596 | 0.55 | down | chr17:46687882-46688247   |
| TI16715REF_FLNB_AS009      | 0.000545 | 0.0061  | 0.55 | down | chr3:58118093-58118484    |
| ASK04447REF                | 0.000657 | 0.00696 | 0.55 | down | ENST00000466473           |
| TI20645REF_BRWD1_AS001     | 0.000696 | 0.00718 | 0.55 | down | chr21:40559911-40560058   |
| ASK06591REF_ANTXR1_AS001   | 0.000742 | 0.00742 | 0.55 | down | chr2:69476101-69476245    |
| TI16621REF_GABRE_AS011     | 0.000805 | 0.00796 | 0.55 | down | chrX:151126094-151126273  |

|                          |          |         |      |      |                           |
|--------------------------|----------|---------|------|------|---------------------------|
| TI16254REF_CARS2_AS005   | 0.000841 | 0.00819 | 0.55 | down | chr13:111319176-111319269 |
| TI17186REF_IGF2BP1_AS004 | 0.001854 | 0.0145  | 0.55 | down | chr17:47124902-47125047   |
| TI17384REF_FBXW4_AS002   | 0.002018 | 0.0153  | 0.55 | down | chr10:103447527-103447631 |
| TI16169REF_ELL2_AS004    | 0.00222  | 0.016   | 0.55 | down | chr5:95243182-95243299    |
| ASK00822NTNR             | 0.002903 | 0.0195  | 0.55 | down | XR_109900                 |
| ASK00989NTNR             | 0.003258 | 0.0212  | 0.55 | down | NR_033680                 |
| TI17533REF_INSIG2_AS005  | 0.003576 | 0.0226  | 0.55 | down | chr2:118857547-118857667  |
| TI16134REF_FARP1_AS018   | 0.003685 | 0.0232  | 0.55 | down | chr13:99058019-99058196   |
| TI01849NTNR              | 0.006997 | 0.0357  | 0.55 | down | XR_110300                 |
| TI01850NTNR              | 0.006997 | 0.0357  | 0.55 | down | XR_133066                 |
| ASK06202REF_REP15_AS001  | 0.008463 | 0.0401  | 0.55 | down | chr12:27849534-27849904   |
| TI16126REF_HNRNPC_AS025  | 0.010196 | 0.0456  | 0.55 | down | chr14:21727306-21727421   |
| TI17911REF_MLPH_AS004    | 0.015988 | 0.0611  | 0.55 | down | chr2:238398308-238398418  |
| TI20835REF_ELOVL6_AS002  | 4.99E-05 | 0.00117 | 0.54 | down | chr4:110968064-110968194  |
| TI16621REF_GABRE_AS009   | 7.68E-05 | 0.00161 | 0.54 | down | chrX:151140745-151141096  |
| TI17606REF_RBPJ_AS004    | 0.000196 | 0.00301 | 0.54 | down | chr4:26433690-26433839    |
| ASK01217NTNR             | 0.000312 | 0.00412 | 0.54 | down | NR_004858                 |
| TI18662REF_UGCG_AS003    | 0.000395 | 0.00483 | 0.54 | down | chr9:114695892-114696075  |
| TI19205REF_ZNF814_AS001  | 0.000512 | 0.00591 | 0.54 | down | chr19:58382771-58382890   |
| TI18937REF_C1RL_AS003    | 0.00216  | 0.0159  | 0.54 | down | chr12:7251943-7252161     |
| TI20152REF_QPRT_AS002    | 0.003047 | 0.0202  | 0.54 | down | chr16:29707283-29707398   |
| TI16134REF_FARP1_AS015   | 0.004773 | 0.0281  | 0.54 | down | chr13:99052250-99052360   |
| TI18544REF_ESYT3_AS004   | 0.004886 | 0.0285  | 0.54 | down | chr3:138156346-138156498  |
| TI16045REF_GRID1_AS032   | 0.024198 | 0.0812  | 0.54 | down | chr10:87906283-87906379   |
| TI16137REF_LPP_AS019     | 0.036202 | 0.108   | 0.54 | down | chr3:188506184-188506287  |
| TI16160REF_TBC1D16_AS015 | 6.41E-05 | 0.00141 | 0.53 | down | chr17:77913536-77913721   |
| TI19923REF_SPATS2_AS001  | 0.000105 | 0.00203 | 0.53 | down | chr12:49890265-49890459   |
| TI16080REF_MPRIP_AS023   | 0.000112 | 0.00212 | 0.53 | down | chr17:17094551-17094867   |
| TI16080REF_MPRIP_AS007   | 0.000206 | 0.00311 | 0.53 | down | chr17:17091988-17092083   |
| ASK00729NTNR             | 0.000395 | 0.00483 | 0.53 | down | XR_111321                 |
| TI18416REF_KCTD15_AS003  | 0.000464 | 0.00542 | 0.53 | down | chr19:34305806-34305966   |
| TI16169REF_ELL2_AS015    | 0.000525 | 0.00596 | 0.53 | down | chr5:95247812-95247977    |
| TI16390REF_MGAT5_AS004   | 0.001426 | 0.0121  | 0.53 | down | chr2:135207321-135207877  |
| TI16134REF_FARP1_AS024   | 0.002106 | 0.0157  | 0.53 | down | chr13:99055377-99055528   |
| TI16968REF_VPS53_AS008   | 0.002125 | 0.0158  | 0.53 | down | chr17:420009-420104       |
| TI16121REF_NPAS2_AS020   | 0.018529 | 0.0677  | 0.53 | down | chr2:101488115-101488247  |
| TI17412REF_ISCU_AS001    | 0.033918 | 0.103   | 0.53 | down | chr12:108956603-108956698 |
| TI17288REF_UBXN7_AS006   | 4.07E-05 | 0.00101 | 0.52 | down | chr3:196077819-196077984  |
| ASK06877REF_SNAP25_AS001 | 9.93E-05 | 0.00202 | 0.52 | down | chr20:10287139-10287888   |
| ASK00625NTNR             | 0.000117 | 0.00218 | 0.52 | down | NR_003716                 |
| TI17533REF_INSIG2_AS002  | 0.000119 | 0.00219 | 0.52 | down | chr2:118861850-118861971  |
| TI16621REF_GABRE_AS002   | 0.000148 | 0.00256 | 0.52 | down | chrX:151140592-151140700  |
| TI16452REF_SHANK3_AS013  | 0.000154 | 0.00258 | 0.52 | down | chr22:51164405-51164547   |
| ASK06320REF_CITED2_AS001 | 0.000154 | 0.00258 | 0.52 | down | chr6:139693597-139693893  |
| TI16080REF_MPRIP_AS029   | 0.000187 | 0.00291 | 0.52 | down | chr17:17092197-17092430   |
| TI19205REF_ZNF814_AS003  | 0.000216 | 0.00316 | 0.52 | down | chr19:58381738-58381931   |
| TI16080REF_MPRIP_AS004   | 0.000364 | 0.00457 | 0.52 | down | chr17:17090770-17090955   |
| TI17544REF_RTN4_AS006    | 0.000367 | 0.00457 | 0.52 | down | chr2:55204292-55204435    |
| ASK07035REF_MAP9_AS001   | 0.000811 | 0.00799 | 0.52 | down | chr4:156267456-156267708  |
| TI17921REF_SSFA2_AS005   | 0.001391 | 0.0118  | 0.52 | down | chr2:182782841-182782957  |
| TI16715REF_FLNB_AS005    | 0.001955 | 0.015   | 0.52 | down | chr3:58117119-58117339    |
| TI16080REF_MPRIP_AS008   | 0.003405 | 0.0217  | 0.52 | down | chr17:17093304-17093561   |
| TI16060REF_SKI_AS006     | 0.00561  | 0.031   | 0.52 | down | chr1:2190852-2190957      |
| TI21045REF_EPPK1_AS001   | 0.007021 | 0.0357  | 0.52 | down | chr8:144947922-144948059  |
| TI16606REF_STC2_AS003    | 3.70E-05 | 0.00097 | 0.51 | down | chr5:172745553-172745701  |

|                              |          |         |      |      |                          |
|------------------------------|----------|---------|------|------|--------------------------|
| TI16080REF_MPRIP_AS016       | 4.55E-05 | 0.00107 | 0.51 | down | chr17:17093151-17093269  |
| TI16035REF_MSI2_AS065        | 0.000157 | 0.00258 | 0.51 | down | chr17:55757384-55757640  |
| TI01353NTNR                  | 0.000171 | 0.0027  | 0.51 | down | NR_022008                |
| TI16308REF_SON_AS013         | 0.000718 | 0.00732 | 0.51 | down | chr21:34943556-34943759  |
| TI16504REF_RAI1_AS008        | 0.001374 | 0.0118  | 0.51 | down | chr17:17691789-17691894  |
| TI17093REF_PBX1_AS007        | 0.001692 | 0.0137  | 0.51 | down | chr1:164818509-164818620 |
| TI16854REF_PHF10_AS005       | 0.005397 | 0.0306  | 0.51 | down | chr6:170109676-170109781 |
| TI16895REF_MYSM1_AS005       | 0.021598 | 0.0752  | 0.51 | down | chr1:59125200-59125332   |
| TI18051REF_LAMB1_AS003       | 0.000334 | 0.00431 | 0.5  | down | chr7:107587910-107588011 |
| ASK01124NTNR                 | 0.000367 | 0.00457 | 0.5  | down | NR_036488                |
| TI23250REF_PPP4R2_AS001      | 0.002058 | 0.0154  | 0.5  | down | chr3:73115490-73116038   |
| TI16169REF_ELL2_AS020        | 0.003132 | 0.0207  | 0.5  | down | chr5:95221960-95222327   |
| TI17694REF_FUBP1_AS004       | 0.008071 | 0.039   | 0.5  | down | chr1:78417464-78417658   |
| TI16160REF_TBC1D16_AS002     | 1.90E-05 | 0.00063 | 0.49 | down | chr17:77911055-77911246  |
| ASK00955NTNR                 | 2.73E-05 | 0.0008  | 0.49 | down | NR_026570                |
| ASK01047NTNR                 | 3.11E-05 | 0.00086 | 0.49 | down | XR_109114                |
| TI17606REF_RBPJ_AS006        | 0.00012  | 0.00221 | 0.49 | down | chr4:26435239-26435372   |
| TI20513REF_NABP1_AS001       | 0.00021  | 0.00315 | 0.49 | down | chr2:192547334-192547429 |
| TI17205REF_DSG2_AS001        | 0.000213 | 0.00316 | 0.49 | down | chr18:29127994-29128143  |
| TI23096REF_MRPS6_AS001       | 0.000234 | 0.00326 | 0.49 | down | chr21:35495996-35496121  |
| TI18572REF_SPCS3_AS003       | 0.000446 | 0.00528 | 0.49 | down | chr4:177251266-177251352 |
| TI16134REF_FARP1_AS002       | 0.001006 | 0.00929 | 0.49 | down | chr13:99056344-99056469  |
| TI16169REF_ELL2_AS002        | 0.006144 | 0.0328  | 0.49 | down | chr5:95221486-95221797   |
| TI01707NTNR                  | 0.013554 | 0.0547  | 0.49 | down | NR_026757                |
| TI18272REF_HIF1A_AS001       | 0.017316 | 0.0641  | 0.49 | down | chr14:62207106-62207204  |
| TI19272REF_COL6A3_AS001      | 0.022064 | 0.0761  | 0.49 | down | chr2:238238929-238239046 |
| TI19584REF_SAT1_AS003        | 1.79E-05 | 0.00061 | 0.48 | down | chrX:23802024-23802141   |
| TI11655REF                   | 2.93E-05 | 0.00083 | 0.48 | down | ENST00000564967          |
| TI19584REF_SAT1_AS002        | 3.83E-05 | 0.00099 | 0.48 | down | chrX:23802164-23802337   |
| TI16080REF_MPRIP_AS021       | 4.04E-05 | 0.00101 | 0.48 | down | chr17:17094320-17094460  |
| TI16769REF_RPL27A_AS002      | 7.23E-05 | 0.00154 | 0.48 | down | chr11:8709483-8709599    |
| TI01924NTNR                  | 0.000165 | 0.00265 | 0.48 | down | XR_108329                |
| TI01925NTNR                  | 0.000165 | 0.00265 | 0.48 | down | XR_108330                |
| TI01487NTNR                  | 0.000234 | 0.00326 | 0.48 | down | XR_110657                |
| ASK05870REF_PPP1R2_AS001     | 0.000268 | 0.00368 | 0.48 | down | chr3:195241243-195241676 |
| ASK05026REF_TRPV2_AS002      | 0.000276 | 0.00373 | 0.48 | down | chr17:16328761-16331247  |
| TI01668NTNR                  | 0.000346 | 0.00442 | 0.48 | down | XR_111050                |
| ASK03300REF                  | 0.000462 | 0.00542 | 0.48 | down | ENST00000552877          |
| TI16160REF_TBC1D16_AS010     | 0.000571 | 0.00628 | 0.48 | down | chr17:77909671-77909849  |
| ASK04645REF                  | 0.00338  | 0.0217  | 0.48 | down | ENST00000498479          |
| TI02072NTNR                  | 0.010653 | 0.0467  | 0.48 | down | NR_037772                |
| ASK06546REF_KLHL5_AS001      | 1.10E-05 | 0.00044 | 0.47 | down | chr4:39114572-39128422   |
| TI16080REF_MPRIP_AS017       | 1.55E-05 | 0.00056 | 0.47 | down | chr17:17089167-17089262  |
| TI16137REF_LPP_AS020         | 5.44E-05 | 0.00123 | 0.47 | down | chr3:188606805-188607366 |
| TI16606REF_STC2_AS006        | 0.000132 | 0.00234 | 0.47 | down | chr5:172746236-172746325 |
| TI20388REF_SAMD4B_AS002      | 0.006074 | 0.0326  | 0.47 | down | chr19:39835101-39835211  |
| ASK02854REF                  | 1.46E-05 | 0.00055 | 0.46 | down | ENST00000495451          |
| TI19518REF_UBXN2B_AS002      | 4.43E-05 | 0.00107 | 0.46 | down | chr8:59333740-59333882   |
| TI17205REF_DSG2_AS004        | 6.15E-05 | 0.00136 | 0.46 | down | chr18:29126843-29127338  |
| ASK05026REF_TRPV2_AS001      | 0.000108 | 0.00207 | 0.46 | down | chr17:16331582-16331927  |
| ASK02853REF                  | 0.000115 | 0.00216 | 0.46 | down | ENST00000492361          |
| ASK03153REF                  | 0.000158 | 0.00258 | 0.46 | down | ENST00000531102          |
| TI18416REF_KCTD15_AS002      | 0.000723 | 0.00734 | 0.46 | down | chr19:34305426-34305533  |
| TI16330REF_RP11-31I10.4_AS00 | 0.001073 | 0.0098  | 0.46 | down | chr16:1830621-1830714    |
| TI16897REF_TOR1AIP2_AS004    | 0.004298 | 0.026   | 0.46 | down | chr1:179832468-179832599 |



|                               |          |          |      |      |                           |
|-------------------------------|----------|----------|------|------|---------------------------|
| TI16169REF_ELL2_AS010         | 0.015232 | 0.0593   | 0.46 | down | chr5:95225907-95226195    |
| TI02024NTNR                   | 8.10E-06 | 0.00038  | 0.45 | down | NR_026656                 |
| TI16080REF_MPRIP_AS009        | 3.23E-05 | 0.00088  | 0.45 | down | chr17:17065743-17065860   |
| ASK07159REF_WNT5A_AS001       | 9.34E-05 | 0.00191  | 0.45 | down | chr3:55501439-55501787    |
| TI16885REF_SIKE1_AS005        | 0.000105 | 0.00203  | 0.45 | down | chr1:115313063-115313155  |
| TI16458REF_MYLK_AS011         | 0.000976 | 0.00916  | 0.45 | down | chr3:123431211-123431306  |
| TI16169REF_ELL2_AS011         | 0.000985 | 0.00916  | 0.45 | down | chr5:95222812-95222918    |
| TI16406REF_KCNAB2_AS007       | 0.001215 | 0.0108   | 0.45 | down | chr1:6161130-6161253      |
| TI16775REF_SCARB1_AS002       | 0.007574 | 0.0374   | 0.45 | down | chr12:125266937-125267063 |
| ASK05684REF_CLDN14_AS001      | 2.42E-05 | 0.00075  | 0.44 | down | chr21:37832588-37832922   |
| TI19382REF_PLOD2_AS002        | 4.23E-05 | 0.00103  | 0.44 | down | chr3:145796801-145796893  |
| TI18051REF_LAMB1_AS001        | 0.000123 | 0.00222  | 0.44 | down | chr7:107580893-107581002  |
| TI16087REF_HDLBP_AS018        | 0.000135 | 0.00236  | 0.44 | down | chr2:242173029-242173197  |
| ASK03026REF                   | 0.000211 | 0.00315  | 0.44 | down | ENST00000461647           |
| TI17205REF_DSG2_AS006         | 0.001038 | 0.00951  | 0.44 | down | chr18:29128176-29128319   |
| ASK04411REF                   | 9.30E-06 | 0.0004   | 0.43 | down | ENST00000488355           |
| TI17014REF_TIAM1_AS005        | 2.63E-05 | 0.00079  | 0.43 | down | chr21:32494285-32494414   |
| TI16080REF_MPRIP_AS018        | 0.000132 | 0.00234  | 0.43 | down | chr17:17093792-17094092   |
| TI16121REF_NPAS2_AS021        | 0.000232 | 0.00326  | 0.43 | down | chr2:101474741-101474869  |
| ASK07121REF_PCDH7_AS001       | 3.30E-06 | 0.00019  | 0.42 | down | chr4:30723190-30723536    |
| ASK04763REF_EDNRA_AS001       | 7.20E-06 | 0.00035  | 0.42 | down | chr4:148406896-148407324  |
| TI14844REF                    | 1.10E-05 | 0.00044  | 0.42 | down | ENST00000483977           |
| TI16160REF_TBC1D16_AS022      | 3.00E-05 | 0.00083  | 0.42 | down | chr17:77908856-77908988   |
| TI16606REF_STC2_AS010         | 0.000585 | 0.00638  | 0.42 | down | chr5:172749899-172750086  |
| TI16715REF_FLNB_AS004         | 0.002497 | 0.0174   | 0.42 | down | chr3:58117591-58117957    |
| ASK01180NTNR                  | 1.69E-05 | 0.00059  | 0.41 | down | XR_110210                 |
| TI16160REF_TBC1D16_AS007      | 2.77E-05 | 0.0008   | 0.41 | down | chr17:77907184-77907300   |
| ASK02296REF                   | 9.25E-05 | 0.00191  | 0.41 | down | ENST00000531322           |
| TI16508REF_NEDD4L_AS003       | 0.002208 | 0.016    | 0.41 | down | chr18:56067367-56067503   |
| TI16035REF_MSI2_AS001         | 0.003356 | 0.0216   | 0.41 | down | chr17:55759829-55759954   |
| TI16169REF_ELL2_AS018         | 0.005215 | 0.0299   | 0.41 | down | chr5:95248025-95248150    |
| ASK05703REF_DCC_AS001         | 3.00E-06 | 0.00018  | 0.4  | down | chr18:50432403-50432673   |
| ASK07153REF_EFEMP1_AS001      | 9.00E-06 | 0.0004   | 0.4  | down | chr2:56093210-56093654    |
| ASK00641NTNR                  | 1.85E-05 | 0.00062  | 0.4  | down | NR_037182                 |
| ASK02651REF                   | 2.99E-05 | 0.00083  | 0.4  | down | ENST00000446749           |
| TI16621REF_GABRE_AS007        | 4.21E-05 | 0.00103  | 0.4  | down | chrX:151125676-151126002  |
| TI16196REF_SPG7_AS014         | 0.000441 | 0.00526  | 0.4  | down | chr16:89589886-89589982   |
| TI16080REF_MPRIP_AS026        | 4.10E-06 | 0.00023  | 0.39 | down | chr17:17095201-17095471   |
| TI16344REF_KIAA1671_AS012     | 9.20E-06 | 0.0004   | 0.39 | down | chr22:25591568-25591750   |
| TI16080REF_MPRIP_AS024        | 1.70E-05 | 0.00059  | 0.39 | down | chr17:17095543-17095635   |
| TI19382REF_PLOD2_AS003        | 3.94E-05 | 0.001    | 0.39 | down | chr3:145795418-145795515  |
| TI16169REF_ELL2_AS022         | 0.000409 | 0.00496  | 0.39 | down | chr5:95222989-95223085    |
| TI16769REF_RPL27A_AS005       | 0.000978 | 0.00916  | 0.39 | down | chr11:8709837-8709938     |
| TI22794REF_ID2_AS001          | 9.70E-06 | 0.0004   | 0.38 | down | chr2:8823377-8823484      |
| TI16169REF_ELL2_AS013         | 5.43E-05 | 0.00123  | 0.38 | down | chr5:95222562-95222695    |
| TI19295REF_RP5-977B1.10_AS005 | 5.05E-05 | 0.00117  | 0.37 | down | chr20:35240250-35240344   |
| ASK06740REF_KANK1_AS001       | 0.000548 | 0.0061   | 0.37 | down | chr9:745609-746075        |
| ASK03656REF                   | 3.10E-06 | 0.00018  | 0.36 | down | ENST00000535681           |
| TI16772REF_IFITM10_AS009      | 4.47E-05 | 0.00107  | 0.36 | down | chr11:1769024-1769111     |
| TI16809REF_TYMS_AS006         | 0.000105 | 0.00203  | 0.36 | down | chr18:666201-666327       |
| ASK07183REF_RP1-170O19.20_1   | 1.10E-06 | 9.68E-05 | 0.35 | down | chr7:27208749-27209356    |
| TI10837REF                    | 1.78E-05 | 0.00061  | 0.35 | down | ENST00000478436           |
| ASK05491REF_HHIP_AS001        | 2.48E-05 | 0.00076  | 0.35 | down | chr4:145573877-145582494  |
| TI17538REF_FMNL2_AS004        | 2.74E-05 | 0.0008   | 0.35 | down | chr2:153475906-153476005  |
| ASK05904REF_KDM5D_AS001       | 4.54E-05 | 0.00107  | 0.35 | down | chrY:21906676-21906823    |

|                           |          |          |       |      |                           |
|---------------------------|----------|----------|-------|------|---------------------------|
| TI16508REF_NEDD4L_AS008   | 0.000127 | 0.00228  | 0.34  | down | chr18:56067061-56067165   |
| TI19382REF_PLOD2_AS001    | 0.000585 | 0.00638  | 0.34  | down | chr3:145794877-145795091  |
| TI16344REF_KIAA1671_AS005 | 7.70E-06 | 0.00036  | 0.33  | down | chr22:25592261-25592370   |
| ASK03240REF               | 1.21E-05 | 0.00047  | 0.33  | down | ENST00000546199           |
| TI16508REF_NEDD4L_AS004   | 0.000168 | 0.00268  | 0.33  | down | chr18:56066419-56066554   |
| ASK04127REF               | 4.00E-07 | 4.80E-05 | 0.32  | down | ENST00000465659           |
| ASK06442REF_PRUNE2_AS001  | 1.30E-06 | 0.00011  | 0.32  | down | chr9:79319764-79320231    |
| ASK03993REF               | 2.20E-06 | 0.00016  | 0.32  | down | ENST00000464589           |
| ASK03363REF               | 2.10E-05 | 0.00068  | 0.32  | down | ENST00000556245           |
| ASK07010REF_SSPN_AS001    | 2.50E-06 | 0.00016  | 0.31  | down | chr12:26384373-26384682   |
| TI16395REF_SIK1_AS011     | 2.70E-06 | 0.00017  | 0.31  | down | chr21:44844404-44844578   |
| TI16344REF_KIAA1671_AS004 | 4.00E-07 | 4.80E-05 | 0.3   | down | chr22:25589738-25589920   |
| TI23098REF_ADAMTS1_AS001  | 1.00E-06 | 9.10E-05 | 0.3   | down | chr21:28215535-28215651   |
| ASK06078REF_GALNT3_AS001  | 2.90E-06 | 0.00018  | 0.3   | down | chr2:166603381-166606460  |
| TI22142REF_NR2F2_AS001    | 1.38E-05 | 0.00053  | 0.29  | down | chr15:96875882-96876047   |
| TI16344REF_KIAA1671_AS014 | 2.50E-06 | 0.00016  | 0.28  | down | chr22:25590367-25590565   |
| ASK00919NTNR              | 1.00E-07 | 1.65E-05 | 0.27  | down | NR_033660                 |
| ASK05666REF_CNR1_AS001    | 4.00E-07 | 4.80E-05 | 0.27  | down | chr6:88852118-88852664    |
| TI16344REF_KIAA1671_AS010 | 2.24E-05 | 0.00071  | 0.27  | down | chr22:25590928-25591095   |
| TI20152REF_QPRT_AS001     | 5.00E-06 | 0.00026  | 0.26  | down | chr16:29709405-29709540   |
| ASK03812REF               | 2.40E-06 | 0.00016  | 0.25  | down | ENST00000472142           |
| ASK05048REF_SLC37A2_AS002 | 5.40E-06 | 0.00028  | 0.25  | down | chr11:124958026-124958272 |
| ASK06050REF_HOXA11_AS001  | 7.00E-07 | 6.60E-05 | 0.24  | down | chr7:27224179-27224600    |
| ASK00799NTNR              | 7.00E-07 | 6.60E-05 | 0.23  | down | NR_037595                 |
| TI16134REF_FARP1_AS017    | 0.000293 | 0.00393  | 0.23  | down | chr13:99053706-99053877   |
| ASK05689REF_RAB27B_AS001  | 1.00E-07 | 1.65E-05 | 0.22  | down | chr18:52555299-52565289   |
| ASK02878REF               | 1.30E-06 | 0.00011  | 0.22  | down | ENST00000491263           |
| TI16395REF_SIK1_AS003     | 7.50E-06 | 0.00036  | 0.22  | down | chr21:44843900-44844078   |
| TI16930REF_KRT8_AS002     | 9.20E-06 | 0.0004   | 0.21  | down | chr12:53341932-53342217   |
| TI19679REF_TBX15_AS001    | 6.56E-05 | 0.00142  | 0.2   | down | chr1:119526285-119526380  |
| ASK02729REF               | 1.00E-07 | 1.00E-07 | 0.19  | down | ENST00000514040           |
| ASK07356REF_HSD17B2_AS001 | 5.00E-07 | 5.50E-05 | 0.19  | down | chr16:82104411-82104787   |
| ASK06946REF_ST18_AS001    | 1.00E-07 | 1.65E-05 | 0.16  | down | chr8:53038283-53038696    |
| ASK06043REF_TSPAN13_AS001 | 1.00E-07 | 1.00E-07 | 0.12  | down | chr7:16823650-16824073    |
| ASK02952REF               | 1.00E-07 | 1.65E-05 | 0.12  | down | ENST00000470170           |
| ASK05042REF_EFNB2_AS002   | 1.00E-07 | 1.00E-07 | 0.11  | down | chr13:107144703-107145374 |
| ASK00892NTNR              | 1.00E-07 | 1.00E-07 | 0.086 | down | NR_037939                 |
| NC00354FR                 | 1.00E-07 | 1.00E-07 | 0.041 | down | FR240648                  |

Supplementary table 2.differentially expressed mRNA in BMSCs and PDLSCs

| ProbeSet  | p-value   | FDR        | PDLSCs/BMSCs | style | gene_symbol |
|-----------|-----------|------------|--------------|-------|-------------|
| TC1700360 | 0.0000001 | 0.0000001  | 14.17        | up    | CCL2        |
| TC0501120 | 0.0000001 | 0.0000001  | 12.43        | up    | HAPLN1      |
| TC0X00009 | 0.0000001 | 0.0000001  | 9.45         | up    | XG          |
| TC0501080 | 0.0000001 | 0.0000001  | 9.37         | up    | F2RL2       |
| TC0X00740 | 0.0000001 | 0.0000001  | 7.93         | up    | MXRA5       |
| TC1400180 | 0.0000001 | 0.0000001  | 7.88         | up    | PAX9        |
| TC1200714 | 0.0000001 | 0.0000001  | 7.84         | up    | OAS2        |
| TC0400318 | 0.0000001 | 0.00000202 | 7.55         | up    | EPGN        |
| TC1600650 | 0.0000012 | 0.0000129  | 7.24         | up    | FOXF1       |
| TC1000844 | 0.0000009 | 0.0000102  | 6.79         | up    | MKX         |
| TC0600008 | 0.0000004 | 0.00000586 | 6.71         | up    | FOXF2       |
| TC0601604 | 0.0000001 | 0.0000001  | 5.86         | up    | MOXD1       |
| TC0202302 | 0.0000001 | 0.0000001  | 5.81         | up    | IGFBP5      |
| TC0500310 | 0.0000001 | 0.0000001  | 5.77         | up    | RASGRF2     |
| TC0901145 | 0.0000001 | 0.0000001  | 5.72         | up    | BARX1       |
| TC2000071 | 0.0000001 | 0.0000001  | 5.37         | up    | PLCB4       |
| TC2200354 | 0.0000001 | 0.0000001  | 5.31         | up    | FBLN1       |
| TC0400315 | 0.0000001 | 0.00000202 | 5.1          | up    | CXCL1       |
| TC0501259 | 0.0000001 | 0.0000001  | 4.97         | up    | FBN2        |
| TC0801026 | 0.0000007 | 0.00000852 | 4.88         | up    | TRPA1       |
| TC0800962 | 0.0000001 | 0.0000001  | 4.64         | up    | TOX         |
| TC0700158 | 0.0000001 | 0.0000001  | 4.54         | up    | AQP1        |
| TC0300800 | 0.0000001 | 0.0000001  | 4.49         | up    | NLGN1       |
| TC1200075 | 0.0000001 | 0.0000001  | 4.47         | up    | C1S         |
| TC1200712 | 0.0000001 | 0.0000001  | 4.33         | up    | OAS1        |
| TC0500174 | 0.0000001 | 0.0000001  | 4.24         | up    | FST         |
| TC0900435 | 0.0000021 | 0.0000188  | 4.19         | up    | NR4A3       |
| TC0X00989 | 0.0000001 | 0.0000001  | 4.15         | up    | EDA2R       |
| TC1800290 | 0.0000001 | 0.0000001  | 4.14         | up    | COLEC12     |
| TC0401288 | 0.0000001 | 0.00000202 | 4.1          | up    | RNF150      |
| TC2000628 | 0.0000019 | 0.0000175  | 4.05         | up    | CST4        |
| TC0901186 | 0.0000001 | 0.00000202 | 4.02         | up    | GABBR2      |
| TC1901095 | 0.0000001 | 0.0000001  | 4.01         | up    | C3          |
| TC0900529 | 0.0000001 | 0.0000001  | 4            | up    | PTGS1       |
| TC1200713 | 0.0000001 | 0.00000202 | 3.99         | up    | OAS3        |
| TC1600899 | 0.0000001 | 0.0000001  | 3.88         | up    | XYLT1       |
| TC1200047 | 0.0000001 | 0.0000001  | 3.87         | up    | NTF3        |
| TC0202309 | 0.0000001 | 0.0000001  | 3.74         | up    | TNS1        |
| TC1000629 | 0.0000001 | 0.0000001  | 3.68         | up    | GRK5        |
| TC2000398 | 0.0000014 | 0.0000143  | 3.58         | up    | TFAP2C      |
| TC0500282 | 0.0000004 | 0.00000586 | 3.56         | up    | F2R         |

|           |           |            |      |    |              |
|-----------|-----------|------------|------|----|--------------|
| TC1200919 | 0.0000001 | 0.00000202 | 3.47 | up | C1R          |
| TC0801212 | 0.0000001 | 0.0000001  | 3.46 | up | ENPP2        |
| TC1500323 | 0.0000007 | 0.00000852 | 3.42 | up | FGF7         |
| TC0900624 | 0.0000002 | 0.00000349 | 3.42 | up | PRRX2        |
| TC0500638 | 0.0000001 | 0.00000202 | 3.39 | up | SGCD         |
| TC0400312 | 0.0000004 | 0.00000586 | 3.35 | up | IL8          |
| TC0701417 | 0.0000006 | 0.00000769 | 3.35 | up | SAMD9        |
| TC1001179 | 0.0000001 | 0.0000001  | 3.33 | up | PDLIM1       |
| TC0600502 | 0.0000026 | 0.0000217  | 3.31 | up | KCNQ5        |
| TC0400231 | 0.0000001 | 0.0000001  | 3.29 | up | PDGFRA       |
| TC0100626 | 0.0000003 | 0.00000475 | 3.27 | up | LEPROT       |
| TC0401221 | 0.0000023 | 0.0000199  | 3.21 | up | PDE5A        |
| TC0100679 | 0.0000009 | 0.0000516  | 3.16 | up | IFI44        |
| TC0100656 | 0.0000019 | 0.0000175  | 3.15 | up | LHX8         |
| TC0X00545 | 0.0000023 | 0.0000199  | 3.14 | up | GRIA3        |
| TC2200020 | 0.0000005 | 0.00000688 | 3.14 | up | USP18        |
| TC1100240 | 0.0000066 | 0.0000417  | 3.1  | up | ANO3         |
| TC1701235 | 0.0000002 | 0.00000349 | 3.1  | up | SLFN11       |
| TC0800311 | 0.0000002 | 0.00000349 | 3.08 | up | LYN          |
| TC0300664 | 0.0000001 | 0.0000001  | 3.07 | up | CLSTN2       |
| TC0100808 | 0.0000028 | 0.000023   | 3.06 | up | GSTM1        |
| TC0901096 | 0.0000011 | 0.0000121  | 3.03 | up | GAS1         |
| TC1101830 | 0.0000004 | 0.00000586 | 2.93 | up | CRYAB        |
| TC1500435 | 0.0000003 | 0.00000475 | 2.93 | up | PAQR5        |
| TC0202202 | 0.0000007 | 0.00000852 | 2.93 | up | RFTN2        |
| TC1201537 | 0.0000006 | 0.00000769 | 2.93 | up | TMEM119      |
| TC0901277 | 0.0000004 | 0.00000586 | 2.92 | up | TNFSF15      |
| TC1200492 | 0.0000004 | 0.00000586 | 2.9  | up | IRAK3        |
| TC0400051 | 0.0000872 | 0.00031    | 2.86 | up | MSX1         |
| TC1800511 | 0.0000001 | 0.0000001  | 2.81 | up | CCBE1        |
| TC0200349 | 0.0000001 | 0.00000202 | 2.8  | up | ACTG2        |
| TC1400899 | 0.0000001 | 0.0000001  | 2.79 | up | SIX1         |
| TC0901020 | 0.0002737 | 0.000822   | 2.78 | up | Q59F31_HUMAN |
| TC2200523 | 0.0000003 | 0.00000475 | 2.77 | up | GSTT1        |
| TC0600743 | 0.0000002 | 0.00000349 | 2.77 | up | PDE7B        |
| TC1700076 | 0.0000001 | 0.0000001  | 2.77 | up | XAF1         |
| TC1700140 | 0.0000066 | 0.0000417  | 2.75 | up | MYOCD        |
| TC1101566 | 0.0000001 | 0.0000001  | 2.73 | up | CD248        |
| TC0800779 | 0.0000008 | 0.00000948 | 2.73 | up | CSGALNACT1   |
| TC0X01163 | 0.0000004 | 0.00000586 | 2.68 | up | AMOT         |
| TC0500723 | 0.0000001 | 0.00000202 | 2.65 | up | MSX2         |
| TC1700661 | 0.0000001 | 0.0000001  | 2.65 | up | TBX2         |
| TC0200019 | 0.0000001 | 0.0000001  | 2.62 | up | RSAD2        |
| TC0800567 | 0.0000087 | 0.0000503  | 2.62 | up | WISP1        |

|           |           |            |      |    |           |
|-----------|-----------|------------|------|----|-----------|
| TC1200015 | 0.0000001 | 0.0000001  | 2.61 | up | CACNA1C   |
| TC0600731 | 0.0000026 | 0.0000217  | 2.59 | up | EYA4      |
| TC0601557 | 0.0000001 | 0.00000202 | 2.59 | up | FAM162B   |
| TC0201785 | 0.0000022 | 0.0000192  | 2.57 | up | TBC1D8    |
| TC1101777 | 0.0000084 | 0.0000494  | 2.53 | up | MMP12     |
| TC0700616 | 0.0000001 | 0.00000202 | 2.52 | up | LRRN3     |
| TC0500681 | 0.0000003 | 0.00000475 | 2.52 | up | WWC1      |
| TC1200048 | 0.0000001 | 0.0000001  | 2.49 | up | CD9       |
| TC1201535 | 0.0000002 | 0.00000349 | 2.49 | up | CMKLR1    |
| TC1300555 | 0.0000004 | 0.00000586 | 2.48 | up | KCTD12    |
| TC1401102 | 0.0000001 | 0.00000202 | 2.47 | up | LINC00341 |
| TC2200553 | 0.0000006 | 0.00000769 | 2.46 | up | MN1       |
| TC0800107 | 0.0000001 | 0.00000202 | 2.45 | up | SLC7A2    |
| TC0102731 | 0.0000002 | 0.00000349 | 2.44 | up | CTSK      |
| TC0202191 | 0.0000116 | 0.0000625  | 2.42 | up | HECW2     |
| TC0102037 | 0.0000009 | 0.0000102  | 2.42 | up | IFI6      |
| TC1201525 | 0.0000056 | 0.000037   | 2.37 | up | APPL2     |
| TC0700481 | 0.0000001 | 0.00000202 | 2.37 | up | GNG11     |
| TC2100142 | 0.0000001 | 0.0000001  | 2.37 | up | MX1       |
| TC1100144 | 0.0002055 | 0.000644   | 2.34 | up | OLFML1    |
| TC1800144 | 0.0000031 | 0.0000246  | 2.33 | up | MOCOS     |
| TC0800897 | 0.0000015 | 0.0000148  | 2.32 | up | SFRP1     |
| TC0700089 | 0.0000016 | 0.0000155  | 2.31 | up | AHR       |
| TC0701680 | 0.0000076 | 0.0000458  | 2.31 | up | PARP12    |
| TC1001328 | 0.0000001 | 0.00000202 | 2.3  | up | CPXM2     |
| TC0500141 | 0.000001  | 0.0000112  | 2.3  | up | PTGER4    |
| TC1200945 | 0.0000007 | 0.00000852 | 2.29 | up | MFAP5     |
| TC1501189 | 0.0000003 | 0.00000475 | 2.27 | up | HOMER2    |
| TC0800459 | 0.0000939 | 0.00033    | 2.27 | up | OSR2      |
| TC0100275 | 0.0000005 | 0.00000688 | 2.26 | up | MAN1C1    |
| TC0600186 | 0.0000006 | 0.00000769 | 2.25 | up | HIST1H2BM |
| TC1000554 | 0.0000128 | 0.0000677  | 2.25 | up | INA       |
| TC0101513 | 0.0000076 | 0.0000458  | 2.25 | up | KCNK2     |
| TC0701053 | 0.0000074 | 0.000045   | 2.25 | up | LOC541472 |
| TC1600627 | 0.0000002 | 0.00000349 | 2.24 | up | CDH13     |
| TC0700220 | 0.0000001 | 0.00000202 | 2.23 | up | AEBP1     |
| TC0501071 | 0.0000138 | 0.0000714  | 2.23 | up | GCNT4     |
| TC0401264 | 0.0000007 | 0.00000852 | 2.23 | up | PCDH18    |
| TC1201615 | 0.0000008 | 0.00000948 | 2.22 | up | CIT       |
| TC1100010 | 0.000001  | 0.0000112  | 2.22 | up | IFITM1    |
| TC0200169 | 0.0000003 | 0.00000475 | 2.21 | up | LTBP1     |
| TC0500643 | 0.0000009 | 0.0000102  | 2.2  | up | CYFIP2    |
| TC0800222 | 0.0000002 | 0.00000349 | 2.2  | up | GPR124    |
| TC1101775 | 0.0000001 | 0.00000202 | 2.2  | up | MMP1      |

|           |           |            |      |    |           |
|-----------|-----------|------------|------|----|-----------|
| TC1700605 | 0.0000035 | 0.0000268  | 2.2  | up | TOM1L1    |
| TC1701647 | 0.0000109 | 0.0000593  | 2.19 | up | ABCA6     |
| TC0X00307 | 0.0000006 | 0.00000769 | 2.19 | up | HEPH      |
| TC0900283 | 0.0000005 | 0.00000688 | 2.19 | up | TJP2      |
| TC0801210 | 0.0000004 | 0.00000586 | 2.19 | up | TNFRSF11B |
| TC1400465 | 0.0000494 | 0.000198   | 2.18 | up | PPP4R4    |
| TC0701144 | 0.0000034 | 0.0000265  | 2.17 | up | AMPH      |
| TC0201409 | 0.0000005 | 0.00000688 | 2.17 | up | GALNT14   |
| TC1200362 | 0.0000001 | 0.00000202 | 2.17 | up | IGFBP6    |
| TC0X00164 | 0.0000031 | 0.0000246  | 2.17 | up | MAOA      |
| TC0101660 | 0.0000136 | 0.0000706  | 2.16 | up | FMN2      |
| TC1201442 | 0.0000001 | 0.0000112  | 2.14 | up | DCN       |
| TC0202184 | 0.0000065 | 0.0000414  | 2.14 | up | SDPR      |
| TC1800051 | 0.0000037 | 0.0000278  | 2.12 | up | APCDD1    |
| TC0700804 | 0.0000004 | 0.00000586 | 2.11 | up | EPHB6     |
| TC0201998 | 0.0000004 | 0.00000586 | 2.11 | up | RND3      |
| TC0600734 | 0.000049  | 0.000197   | 2.11 | up | TCF21     |
| TC0601023 | 0.0000091 | 0.0000521  | 2.1  | up | HIST2H4A  |
| TC0401141 | 0.0000015 | 0.0000148  | 2.08 | up | ADH1C     |
| TC1701244 | 0.0000365 | 0.000158   | 2.08 | up | CCL5      |
| TC0901131 | 0.0000001 | 0.00000202 | 2.08 | up | OMD       |
| TC2200448 | 0.0000837 | 0.0003     | 2.08 | up | USP41     |
| TC1100276 | 0.0000016 | 0.0000155  | 2.06 | up | FJX1      |
| TC0101393 | 0.0000018 | 0.0000169  | 2.06 | up | NR5A2     |
| TC1400762 | 0.0000003 | 0.00000475 | 2.06 | up | PRKD1     |
| TC0200918 | 0.0000389 | 0.000166   | 2.06 | up | ZNF804A   |
| TC1000789 | 0.0000053 | 0.0000355  | 2.05 | up | ITGA8     |
| TC0800108 | 0.0000022 | 0.0000192  | 2.05 | up | PDGFRL    |
| TC1201104 | 0.0001698 | 0.000548   | 2.04 | up | CPNE8     |
| TC0102283 | 0.0000003 | 0.00000475 | 2.03 | up | DHCR24    |
| TC0800172 | 0.0000112 | 0.0000604  | 2.03 | up | ESCO2     |
| TC1000856 | 0.0000072 | 0.0000442  | 2.03 | up | KIAA1462  |
| TC1500808 | 0.0000005 | 0.0000341  | 2.03 | up | LPCAT4    |
| TC1100273 | 0.0000002 | 0.00000349 | 2.02 | up | EHF       |
| TC1300369 | 0.0000277 | 0.000128   | 2.02 | up | FLT1      |
| TC0600134 | 0.0000099 | 0.0000555  | 2.02 | up | LRRRC16A  |
| TC0101906 | 0.0000153 | 0.0000774  | 2.02 | up | TMEM16M   |
| TC1000918 | 0.0000087 | 0.0000503  | 2.01 | up | CXCL12    |
| TC0501405 | 0.0000002 | 0.00000349 | 2    | up | PDGFRB    |
| TC0X00073 | 0.0000528 | 0.000209   | 2    | up | SCML1     |
| TC0700156 | 0.0000004 | 0.00000586 | 1.99 | up | INMT      |
| TC0400949 | 0.0000009 | 0.0000102  | 1.99 | up | SCFD2     |
| TC0500106 | 0.0000016 | 0.0000155  | 1.98 | up | C5orf23   |
| TC0202052 | 0.0000052 | 0.0000351  | 1.97 | up | IFIH1     |

|            |           |            |      |    |              |
|------------|-----------|------------|------|----|--------------|
| TC1600639  | 0.000008  | 0.0000475  | 1.96 | up | CRISPLD2     |
| TC0X00744  | 0.0000212 | 0.000102   | 1.96 | up | LOC389906    |
| TC0201067  | 0.0000248 | 0.000117   | 1.95 | up | CPS1         |
| TC1200558  | 0.0000476 | 0.000192   | 1.94 | up | ALX1         |
| TC1100793  | 0.0000053 | 0.0000355  | 1.94 | up | BIRC3        |
| TC0700107  | 0.0000057 | 0.0000373  | 1.94 | up | IL6          |
| TC0801025  | 0.0000231 | 0.00011    | 1.94 | up | MSC          |
| TC1700284  | 0.0000042 | 0.0000304  | 1.94 | up | TMEM97       |
| TC0800581  | 0.0000079 | 0.0000472  | 1.93 | up | DENND3       |
| TC0100812  | 0.0000112 | 0.0000604  | 1.93 | up | GSTM5        |
| TC1101776  | 0.0000022 | 0.0000192  | 1.93 | up | MMP3         |
| TC1500271  | 0.0000133 | 0.0000697  | 1.93 | up | TMEM62       |
| TC1800335  | 0.0000039 | 0.0000288  | 1.92 | up | CR030_HUMAN  |
| TC0701658  | 0.0000005 | 0.00000688 | 1.92 | up | FAM180A      |
| TC0100678  | 0.0000087 | 0.0000503  | 1.92 | up | IFI44L       |
| TC1100196  | 0.0000006 | 0.00000769 | 1.92 | up | INSC         |
| TC1101613  | 0.0000037 | 0.0000278  | 1.91 | up | CPT1A        |
| TC1400414  | 0.0000803 | 0.000292   | 1.91 | up | FLRT2        |
| TC1300029  | 0.000005  | 0.0000341  | 1.9  | up | SPATA13      |
| TC0901239  | 0.0000015 | 0.0000148  | 1.9  | up | SVEP1        |
| TC2200752  | 0.0001802 | 0.000577   | 1.89 | up | Q5H950_HUMAN |
| TC1500525  | 0.0000843 | 0.000302   | 1.88 | up | CHRNA5       |
| TC0401390  | 0.0001644 | 0.000535   | 1.88 | up | DDX60        |
| TC1400716  | 0.0000009 | 0.0000102  | 1.88 | up | SLC7A8       |
| TC1300290  | 0.0000003 | 0.00000475 | 1.87 | up | F10          |
| TC2000720  | 0.0000017 | 0.0000162  | 1.87 | up | SAMHD1       |
| TC0200784  | 0.0000039 | 0.0000288  | 1.87 | up | TNFAIP6      |
| TC1900313  | 0.000003  | 0.0000242  | 1.86 | up | ARRDC2       |
| TC0103401  | 0.0001112 | 0.000382   | 1.86 | up | GREM2        |
| TC1300409  | 0.0001631 | 0.000532   | 1.86 | up | TRPC4        |
| TC0201856  | 0.0006612 | 0.00177    | 1.85 | up | EN1          |
| TC0301838  | 0.0001537 | 0.000506   | 1.85 | up | MASP1        |
| TC0101333  | 0.0000102 | 0.0000565  | 1.85 | up | MR1          |
| TC0500105  | 0.0000009 | 0.0000102  | 1.85 | up | NPR3         |
| TC0901183  | 0.0000191 | 0.000093   | 1.85 | up | TRIM14       |
| TC0400522  | 0.0001881 | 0.000598   | 1.84 | up | HSPA4L       |
| TC1201283  | 0.0000072 | 0.0000442  | 1.84 | up | MMP19        |
| TC0600789  | 0.000012  | 0.0000643  | 1.84 | up | STXBP5       |
| TC0103161  | 0.0003597 | 0.00104    | 1.83 | up | NUAK2        |
| TC0400334  | 0.0000011 | 0.0000121  | 1.83 | up | SHROOM3      |
| TC0201480  | 0.000005  | 0.0000341  | 1.83 | up | SIX2         |
| TC0X00308  | 0.0000089 | 0.0000513  | 1.82 | up | AR           |
| TC01r00012 | 0.0000028 | 0.000023   | 1.82 | up | GCUD2        |
| TC0202407  | 0.0000058 | 0.0000378  | 1.82 | up | HJURP        |



|           |           |            |      |    |              |
|-----------|-----------|------------|------|----|--------------|
| TC1600352 | 0.0000041 | 0.0000298  | 1.82 | up | HSD3B7       |
| TC1100163 | 0.0000144 | 0.0000742  | 1.82 | up | WEE1         |
| TC0601703 | 0.0000379 | 0.000163   | 1.81 | up | CNKSR3       |
| TC0300219 | 0.0001708 | 0.000549   | 1.81 | up | KIF15        |
| TC0102787 | 0.000037  | 0.00016    | 1.8  | up | S100A4       |
| TC1401103 | 0.0000027 | 0.0000225  | 1.79 | up | C14orf49     |
| TC0101641 | 0.0000015 | 0.0000148  | 1.79 | up | EDARADD      |
| TC1300438 | 0.0000145 | 0.0000744  | 1.79 | up | EPSTI1       |
| TC1400464 | 0.000012  | 0.0000643  | 1.79 | up | IFI27        |
| TC0500171 | 0.0000178 | 0.0000881  | 1.79 | up | ITGA2        |
| TC0103196 | 0.0000003 | 0.00000475 | 1.79 | up | PLXNA2       |
| TC0301327 | 0.0000009 | 0.0000102  | 1.78 | up | LRIG1        |
| TC0901054 | 0.000111  | 0.000382   | 1.78 | up | RFK          |
| TC0801115 | 0.0000029 | 0.0000237  | 1.78 | up | RUNX1T1      |
| TC0102432 | 0.000004  | 0.0000293  | 1.78 | up | TGFBR3       |
| TC1101005 | 0.0000052 | 0.0000351  | 1.77 | up | APLP2        |
| TC1500935 | 0.0003651 | 0.00105    | 1.77 | up | CEP152       |
| TC0500854 | 0.0000013 | 0.0000136  | 1.77 | up | CTNND2       |
| TC0301402 | 0.0000021 | 0.0000188  | 1.76 | up | ABI3BP       |
| TC0400339 | 0.0000034 | 0.0000265  | 1.76 | up | FRAS1        |
| TC2200744 | 0.000003  | 0.0000242  | 1.76 | up | KIAA1644     |
| TC0201468 | 0.0000389 | 0.000166   | 1.75 | up | ZFP36L2      |
| TC0901163 | 0.0000015 | 0.0000148  | 1.74 | up | AAED1        |
| TC0X00062 | 0.0001456 | 0.000484   | 1.74 | up | CA5B         |
| TC0400389 | 0.0000129 | 0.0000682  | 1.74 | up | HERC6        |
| TC1101031 | 0.0000048 | 0.0000334  | 1.74 | up | IFITM3       |
| TC0301349 | 0.0000006 | 0.00000769 | 1.74 | up | PDZRN3       |
| TC0800378 | 0.0000478 | 0.000193   | 1.74 | up | RDH10        |
| TC1501224 | 0.0000006 | 0.00000769 | 1.73 | up | MFGE8        |
| TC1400251 | 0.0000035 | 0.0000268  | 1.73 | up | PELI2        |
| TC1800336 | 0.0000017 | 0.0000162  | 1.73 | up | PIEZO2       |
| TC0101975 | 0.0000059 | 0.0000382  | 1.73 | up | TCEA3        |
| TC0201986 | 0.0000039 | 0.0000288  | 1.73 | up | ZEB2         |
| TC2200281 | 0.0000038 | 0.0000283  | 1.72 | up | APOBEC3B     |
| TC1500545 | 0.000001  | 0.0000112  | 1.72 | up | KIAA1199     |
| TC1800513 | 0.0004324 | 0.00123    | 1.72 | up | MC4R         |
| TC1500806 | 0.0000956 | 0.000334   | 1.72 | up | SLC12A6      |
| TC0102861 | 0.0000006 | 0.00000769 | 1.71 | up | NES          |
| TC0300742 | 0.0000015 | 0.0000148  | 1.71 | up | PTX3         |
| TC0X00839 | 0.0000017 | 0.0000162  | 1.71 | up | TMEM47       |
| TC0400693 | 0.0003214 | 0.000944   | 1.7  | up | NEIL3        |
| TC0401096 | 0.0000026 | 0.0000217  | 1.7  | up | NKX6-1       |
| TC0102696 | 0.0023503 | 0.0054     | 1.7  | up | Q5TEC7_HUMAN |
| TC1300566 | 0.0000465 | 0.000189   | 1.7  | up | SPRY2        |

|           |           |            |      |    |              |
|-----------|-----------|------------|------|----|--------------|
| TC0701422 | 0.0000024 | 0.0000204  | 1.7  | up | TFPI2        |
| TC0500658 | 0.000053  | 0.000209   | 1.69 | up | ADRA1B       |
| TC0102858 | 0.0000059 | 0.0000382  | 1.69 | up | IQGAP3       |
| TC0X00657 | 0.0000019 | 0.0000175  | 1.69 | up | MAMLD1       |
| TC1101616 | 0.0000044 | 0.0000313  | 1.69 | up | MRGPRF       |
| TC1000181 | 0.0000017 | 0.0000162  | 1.69 | up | Q96IL8_HUMAN |
| TC0301054 | 0.0000279 | 0.000128   | 1.69 | up | SGOL1        |
| TC0601723 | 0.0000386 | 0.000166   | 1.69 | up | SOD2         |
| TC0401419 | 0.0000669 | 0.000251   | 1.68 | up | ASB5         |
| TC1400236 | 0.000058  | 0.000225   | 1.68 | up | CDKN3        |
| TC0501384 | 0.0000181 | 0.0000892  | 1.68 | up | DPYSL3       |
| TC0101017 | 0.0000006 | 0.00000769 | 1.68 | up | ECM1         |
| TC1100761 | 0.0000036 | 0.0000273  | 1.68 | up | PANX1        |
| TC0101434 | 0.0004562 | 0.00128    | 1.68 | up | PRELP        |
| TC1400847 | 0.0000111 | 0.0000602  | 1.68 | up | SAV1         |
| TC0701387 | 0.0000606 | 0.000233   | 1.68 | up | SEMA3A       |
| TC1200626 | 0.0000043 | 0.0000308  | 1.67 | up | ANO4         |
| TC1400867 | 0.00006   | 0.000232   | 1.67 | up | BMP4         |
| TC0100467 | 0.0000073 | 0.0000446  | 1.67 | up | CDC20        |
| TC1300164 | 0.0000626 | 0.000238   | 1.67 | up | CKAP2        |
| TC0700995 | 0.0000031 | 0.0000246  | 1.67 | up | CYTH3        |
| TC2000339 | 0.0000018 | 0.0000169  | 1.67 | up | EYA2         |
| TC1000778 | 0.0000048 | 0.0000334  | 1.67 | up | FAM107B      |
| TC1000064 | 0.0000056 | 0.000037   | 1.67 | up | MCM10        |
| TC0401450 | 0.0001846 | 0.000589   | 1.67 | up | MLF1IP       |
| TC0800196 | 0.0000477 | 0.000193   | 1.67 | up | NRG1         |
| TC0100860 | 0.0000017 | 0.0000162  | 1.67 | up | OLFML3       |
| TC0202204 | 0.0000009 | 0.0000102  | 1.67 | up | SATB2        |
| TC0102862 | 0.0000044 | 0.0000313  | 1.66 | up | CRABP2       |
| TC0701189 | 0.0000104 | 0.0000573  | 1.66 | up | IGFBP3       |
| TC0900458 | 0.0000076 | 0.0000458  | 1.66 | up | SLC44A1      |
| TC2000043 | 0.0000012 | 0.0000129  | 1.65 | up | CDC25B       |
| TC0701056 | 0.0000845 | 0.000302   | 1.65 | up | FAM126A      |
| TC0100897 | 0.0001159 | 0.000396   | 1.65 | up | FAM72B       |
| TC0201005 | 0.0000919 | 0.000324   | 1.65 | up | FZD7         |
| TC0103049 | 0.00001   | 0.0000559  | 1.65 | up | GLUL         |
| TC1700037 | 0.0000008 | 0.00000948 | 1.65 | up | GSG2         |
| TC0103203 | 0.0006637 | 0.00177    | 1.64 | up | C1orf133     |
| TC0600007 | 0.0000598 | 0.000231   | 1.64 | up | FOXQ1        |
| TC0900040 | 0.0000183 | 0.0000897  | 1.64 | up | PDCD1LG2     |
| TC0701418 | 0.0000048 | 0.0000334  | 1.64 | up | SAMD9L       |
| TC1101899 | 0.0000016 | 0.0000155  | 1.64 | up | THY1         |
| TC0301218 | 0.0000029 | 0.0000237  | 1.64 | up | UBA7         |
| TC1300193 | 0.0008075 | 0.00211    | 1.63 | up | BORA         |

|           |           |            |      |    |              |
|-----------|-----------|------------|------|----|--------------|
| TC0201830 | 0.0000106 | 0.0000581  | 1.63 | up | CKAP2L       |
| TC0500936 | 0.0000069 | 0.000043   | 1.63 | up | DAB2         |
| TC2200665 | 0.0000754 | 0.000276   | 1.63 | up | DMC1         |
| TC1001141 | 0.0000008 | 0.00000948 | 1.62 | up | ACTA2        |
| TC0201439 | 0.0000041 | 0.0000298  | 1.62 | up | CYP1B1       |
| TC1100415 | 0.0055053 | 0.0116     | 1.62 | up | FAM111B      |
| TC1201637 | 0.0000493 | 0.000197   | 1.62 | up | OASL         |
| TC0401212 | 0.0001904 | 0.000604   | 1.62 | up | PRSS12       |
| TC0801284 | 0.00004   | 0.000169   | 1.62 | up | PTK2         |
| TC0200413 | 0.0000639 | 0.000242   | 1.62 | up | VAMP5        |
| TC2000265 | 0.0000564 | 0.00022    | 1.61 | up | FAM83D       |
| TC1401075 | 0.0000015 | 0.0000148  | 1.61 | up | FBLN5        |
| TC0102711 | 0.0000055 | 0.0000365  | 1.61 | up | HIST2H2AB    |
| TC1000433 | 0.0013197 | 0.00324    | 1.61 | up | KIF20B       |
| TC0201337 | 0.000013  | 0.0000684  | 1.61 | up | OSR1         |
| TC1400179 | 0.0013143 | 0.00323    | 1.61 | up | Q96HD6_HUMAN |
| TC0202070 | 0.0000479 | 0.000193   | 1.61 | up | SCN9A        |
| TC0500593 | 0.0000033 | 0.0000259  | 1.6  | up | ABLIM3       |
| TC0400351 | 0.0000071 | 0.0000439  | 1.6  | up | FGF5         |
| TC0X01076 | 0.000635  | 0.00171    | 1.6  | up | NAP1L3       |
| TC1001078 | 0.0000156 | 0.0000785  | 1.6  | up | NDST2        |
| TC0X00346 | 0.0001982 | 0.000625   | 1.6  | up | NHSL2        |
| TC1700880 | 0.0000024 | 0.0000204  | 1.6  | up | NXN          |
| TC0400523 | 0.0005637 | 0.00153    | 1.6  | up | PLK4         |
| TC1400838 | 0.0000038 | 0.0000283  | 1.59 | up | C14orf182    |
| TC0102290 | 0.0000013 | 0.0000136  | 1.59 | up | PPAP2B       |
| TC1300328 | 0.0001379 | 0.000464   | 1.59 | up | SKA3         |
| TC0400929 | 0.000568  | 0.00154    | 1.59 | up | TEC          |
| TC0103126 | 0.0000153 | 0.0000774  | 1.59 | up | UBE2T        |
| TC1400476 | 0.0007376 | 0.00194    | 1.58 | up | BDKRB2       |
| TC0700721 | 0.0000124 | 0.0000661  | 1.58 | up | BPGM         |
| TC0400352 | 0.0019356 | 0.00453    | 1.58 | up | C4orf22      |
| TC1000796 | 0.0000085 | 0.0000497  | 1.58 | up | CUBN         |
| TC1201214 | 0.0000186 | 0.0000909  | 1.58 | up | GALNT6       |
| TC0401052 | 0.0000254 | 0.000119   | 1.58 | up | NAAA         |
| TC0300463 | 0.0000151 | 0.0000767  | 1.58 | up | NFKBIZ       |
| TC0102695 | 0.0007057 | 0.00187    | 1.58 | up | NM_001025303 |
| TC1400531 | 0.0462578 | 0.0771     | 1.58 | up | NR_003198.1  |
| TC0300556 | 0.0000538 | 0.000211   | 1.58 | up | PARP14       |
| TC0700411 | 0.0002302 | 0.000709   | 1.58 | up | SNORA14A     |
| TC1600239 | 0.0002432 | 0.000742   | 1.58 | up | TMEM159      |
| TC0X00032 | 0.0000136 | 0.0000706  | 1.58 | up | WWC3         |
| TC1901223 | 0.0000079 | 0.0000472  | 1.57 | up | CACNA1A      |
| TC0100402 | 0.0000538 | 0.000211   | 1.57 | up | CDC48        |

|            |           |           |      |    |           |
|------------|-----------|-----------|------|----|-----------|
| TC0200862  | 0.0000043 | 0.0000308 | 1.57 | up | DLX1      |
| TC0501493  | 0.0000156 | 0.0000785 | 1.57 | up | DUSP1     |
| TC21r00006 | 0.0000692 | 0.000257  | 1.57 | up | LOC389833 |
| TC1101310  | 0.0000094 | 0.0000535 | 1.57 | up | PAMR1     |
| TC1101263  | 0.0008696 | 0.00225   | 1.57 | up | SVIP      |
| TC0500594  | 0.0000046 | 0.0000326 | 1.56 | up | AFAP1L1   |
| TC0103096  | 0.0003188 | 0.000938  | 1.56 | up | ASPM      |
| TC1201444  | 0.0000822 | 0.000297  | 1.56 | up | BTG1      |
| TC0400592  | 0.0000447 | 0.000185  | 1.56 | up | DCLK2     |
| TC0301339  | 0.0000209 | 0.000101  | 1.56 | up | FOXP1     |
| TC0100486  | 0.0001703 | 0.000549  | 1.56 | up | KIF2C     |
| TC0300289  | 0.0000053 | 0.0000355 | 1.56 | up | MAPKAPK3  |
| TC0600990  | 0.0000287 | 0.000131  | 1.56 | up | MBOAT1    |
| TC1500253  | 0.0000843 | 0.000302  | 1.56 | up | NUSAP1    |
| TC0301636  | 0.0000033 | 0.0000259 | 1.56 | up | PLSCR4    |
| TC0600523  | 0.0024146 | 0.00553   | 1.56 | up | TTK       |
| TC1500238  | 0.0005042 | 0.00139   | 1.55 | up | CASC5     |
| TC0200993  | 0.0001461 | 0.000484  | 1.55 | up | CASP10    |
| TC0103248  | 0.0000404 | 0.00017   | 1.55 | up | DUSP10    |
| TC0X00592  | 0.0000048 | 0.0000334 | 1.55 | up | FHL1      |
| TC2200262  | 0.0009546 | 0.00244   | 1.55 | up | H1FO      |
| TC1701328  | 0.0000028 | 0.000023  | 1.55 | up | KRTAP1-5  |
| TC0701070  | 0.0007326 | 0.00193   | 1.55 | up | OSBPL3    |
| TC1500184  | 0.0007118 | 0.00188   | 1.54 | up | ARHGAP11A |
| TC0200868  | 0.0000232 | 0.00011   | 1.54 | up | CDCA7     |
| TC1101252  | 0.0000102 | 0.0000565 | 1.54 | up | E2F8      |
| TC0102067  | 0.0000235 | 0.000111  | 1.54 | up | FABP3     |
| TC1000425  | 0.0000034 | 0.0000265 | 1.54 | up | FAS       |
| TC1901638  | 0.0000155 | 0.0000782 | 1.54 | up | MEIS3     |
| TC2100141  | 0.0000344 | 0.000151  | 1.54 | up | MX2       |
| TC0800523  | 0.0000099 | 0.0000555 | 1.54 | up | NOV       |
| TC0800192  | 0.0000312 | 0.00014   | 1.54 | up | NRG1      |
| TC0600107  | 0.0000213 | 0.000102  | 1.54 | up | RNF144B   |
| TC0100845  | 0.0000163 | 0.0000818 | 1.54 | up | WNT2B     |
| TC1500272  | 0.000033  | 0.000147  | 1.53 | up | CCNDBP1   |
| TC0401171  | 0.0000593 | 0.00023   | 1.53 | up | DKK2      |
| TC2100125  | 0.0000771 | 0.000281  | 1.53 | up | ETS2      |
| TC0300068  | 0.0000572 | 0.000223  | 1.53 | up | FBLN2     |
| TC0601696  | 0.0006927 | 0.00184   | 1.53 | up | FBXO5     |
| TC0301400  | 0.0000031 | 0.0000246 | 1.53 | up | FILIP1L   |
| TC0400226  | 0.000139  | 0.000466  | 1.53 | up | FIP1L1    |
| TC1200625  | 0.0004782 | 0.00133   | 1.53 | up | GAS2L3    |
| TC1101434  | 0.0030053 | 0.00673   | 1.53 | up | GLYATL2   |
| TC1101801  | 0.0003885 | 0.00111   | 1.53 | up | GUCY1A2   |

|            |           |           |      |    |              |
|------------|-----------|-----------|------|----|--------------|
| TC1000427  | 0.0000265 | 0.000123  | 1.53 | up | IFIT3        |
| TC1500663  | 0.0000117 | 0.0000628 | 1.53 | up | IGF1R        |
| TC1600236  | 0.0004384 | 0.00124   | 1.53 | up | LOC81691     |
| TC0800594  | 0.0000021 | 0.0000188 | 1.53 | up | LY6E         |
| TC1400790  | 0.0000035 | 0.0000268 | 1.53 | up | NFKBIA       |
| TC0501480  | 0.0000022 | 0.0000192 | 1.53 | up | SLIT3        |
| TC0600754  | 0.0000021 | 0.0000188 | 1.53 | up | TNFAIP3      |
| TC2000629  | 0.0048288 | 0.0104    | 1.52 | up | CST2         |
| TC1200367  | 0.0000206 | 0.0000997 | 1.52 | up | ESPL1        |
| TC1600653  | 0.000004  | 0.0000293 | 1.52 | up | FOXL1        |
| TC0103109  | 0.0011731 | 0.00293   | 1.52 | up | KIF14        |
| TC1701435  | 0.0000117 | 0.0000628 | 1.52 | up | KIF18B       |
| TC17r00009 | 0.0002167 | 0.000672  | 1.52 | up | KRTAP1-5     |
| TC1800009  | 0.0005799 | 0.00157   | 1.52 | up | NDC80        |
| TC1901256  | 0.0000031 | 0.0000246 | 1.52 | up | NOTCH3       |
| TC0X00100  | 0.001355  | 0.00332   | 1.52 | up | POLA1        |
| TC1201663  | 0.0000074 | 0.000045  | 1.52 | up | RILPL2       |
| TC1601097  | 0.0001477 | 0.000489  | 1.52 | up | SALL1        |
| TC0102481  | 0.0004854 | 0.00135   | 1.52 | up | SASS6        |
| TC1100448  | 0.000031  | 0.00014   | 1.52 | up | TMEM109      |
| TC1100112  | 0.000031  | 0.00014   | 1.52 | up | TRIM22       |
| TC0601487  | 0.0000415 | 0.000174  | 1.51 | up | BVES         |
| TC1200639  | 0.0010101 | 0.00257   | 1.51 | up | DRAM1        |
| TC0X00757  | 0.000074  | 0.000272  | 1.51 | up | HDHD1        |
| TC0600189  | 0.0000132 | 0.0000692 | 1.51 | up | HIST1H2AG    |
| TC2000554  | 0.0000053 | 0.0000355 | 1.51 | up | JAG1         |
| TC0201241  | 0.0000032 | 0.0000253 | 1.51 | up | Q8N369_HUMAN |
| TC0X00021  | 0.0002225 | 0.000688  | 1.51 | up | STS          |
| TC1500445  | 0.0000356 | 0.000155  | 1.51 | up | THSD4        |
| TC0700724  | 0.0007262 | 0.00192   | 1.51 | up | TMEM140      |
| TC0101018  | 0.0000774 | 0.000282  | 1.5  | up | ADAMTSL4     |
| TC0101512  | 0.0000602 | 0.000232  | 1.5  | up | CENPF        |
| TC0400122  | 0.0011874 | 0.00296   | 1.5  | up | NCAPG        |
| TC0101236  | 0.0004184 | 0.00119   | 1.5  | up | NUF2         |
| TC0200215  | 0.0000585 | 0.000227  | 1.5  | up | PRKCE        |
| TC0102253  | 0.0000379 | 0.000163  | 1.5  | up | RAB3B        |
| TC0601755  | 0.0001495 | 0.000494  | 1.5  | up | RNASSET2     |
| TC0100343  | 0.0000036 | 0.0000273 | 1.5  | up | SERINC2      |
| TC1000863  | 0.0000255 | 0.000119  | 1.5  | up | ZNF438       |
| TC1400844  | 0.0002154 | 0.000669  | 1.49 | up | CDKL1        |
| TC0501006  | 0.0002959 | 0.000878  | 1.49 | up | DEPDC1B      |
| TC1600652  | 0.0000084 | 0.0000494 | 1.49 | up | FOXC2        |
| TC1201307  | 0.0009792 | 0.00249   | 1.49 | up | PRIM1        |
| TC0100937  | 0.0000049 | 0.0000338 | 1.49 | up | RNF115       |

|           |           |           |      |    |              |
|-----------|-----------|-----------|------|----|--------------|
| TC1601070 | 0.0003398 | 0.000988  | 1.49 | up | SHCBP1       |
| TC0300075 | 0.000037  | 0.00016   | 1.49 | up | SLC6A6       |
| TC1200652 | 0.0000462 | 0.000189  | 1.49 | up | TXNRD1       |
| TC0101436 | 0.0000101 | 0.0000563 | 1.48 | up | ATP2B4       |
| TC1900247 | 0.0000061 | 0.0000393 | 1.48 | up | CD97         |
| TC0102705 | 0.0000426 | 0.000178  | 1.48 | up | HIST2H3D     |
| TC0901219 | 0.0000658 | 0.000247  | 1.48 | up | KLF4         |
| TC1201419 | 0.0001325 | 0.000448  | 1.48 | up | LIN7A        |
| TC1200053 | 0.0000249 | 0.000117  | 1.48 | up | NCAPD2       |
| TC0800830 | 0.0000102 | 0.0000565 | 1.48 | up | PBK          |
| TC0100677 | 0.0000568 | 0.000222  | 1.48 | up | PTGFR        |
| TC0600462 | 0.008258  | 0.0167    | 1.48 | up | RN7SK        |
| TC0100399 | 0.0000111 | 0.0000602 | 1.48 | up | ZC3H12A      |
| TC1500160 | 0.0001938 | 0.000613  | 1.47 | up | ARHGAP11B    |
| TC0601549 | 0.0039871 | 0.00868   | 1.47 | up | COL10A1      |
| TC0400724 | 0.0001133 | 0.000388  | 1.47 | up | CYP4V2       |
| TC1901561 | 0.0000317 | 0.000142  | 1.47 | up | ETHE1        |
| TC0200725 | 0.000162  | 0.00053   | 1.47 | up | GPR39        |
| TC1400419 | 0.0001298 | 0.000439  | 1.47 | up | GPR65        |
| TC0200534 | 0.0002846 | 0.000849  | 1.47 | up | IL1R1        |
| TC1101993 | 0.0001826 | 0.000583  | 1.47 | up | NCAPD3       |
| TC0600952 | 0.0000049 | 0.0000338 | 1.47 | up | NEDD9        |
| TC0301497 | 0.0000341 | 0.00015   | 1.47 | up | PARP9        |
| TC0200199 | 0.0004439 | 0.00125   | 1.47 | up | PKDCC        |
| TC1300079 | 0.0004362 | 0.00123   | 1.47 | up | RFC3         |
| TC1701308 | 0.0003437 | 0.000998  | 1.47 | up | TOP2A        |
| TC1200016 | 0.0003594 | 0.00104   | 1.46 | up | CACNA1C      |
| TC1100557 | 0.000118  | 0.000402  | 1.46 | up | CCDC85B      |
| TC0901162 | 0.0000436 | 0.000181  | 1.46 | up | CDC14B       |
| TC0400630 | 0.0001675 | 0.000541  | 1.46 | up | GUCY1B3      |
| TC0601019 | 0.0084411 | 0.0171    | 1.46 | up | HIST1H2BB    |
| TC1000132 | 0.0002146 | 0.000667  | 1.46 | up | MASTL        |
| TC1501243 | 0.0002909 | 0.000865  | 1.46 | up | PRC1         |
| TC0101275 | 0.0000316 | 0.000142  | 1.46 | up | PRRX1        |
| TC1201130 | 0.0176563 | 0.033     | 1.46 | up | Q9P1G1_HUMAN |
| TC2000361 | 0.0000452 | 0.000185  | 1.46 | up | RNF114       |
| TC0500179 | 0.0000569 | 0.000222  | 1.46 | up | SNX18        |
| TC0700319 | 0.0006184 | 0.00167   | 1.46 | up | ZNF138       |
| TC1600210 | 0.0000066 | 0.0000417 | 1.45 | up | ABCC1        |
| TC1001079 | 0.0001126 | 0.000386  | 1.45 | up | CAMK2G       |
| TC1000271 | 0.0023588 | 0.00541   | 1.45 | up | CDK1         |
| TC1000453 | 0.0000312 | 0.00014   | 1.45 | up | CEP55        |
| TC0501517 | 0.0000054 | 0.0000359 | 1.45 | up | CLTB         |
| TC0500059 | 0.0004797 | 0.00134   | 1.45 | up | FBXL7        |

|            |           |           |      |    |              |
|------------|-----------|-----------|------|----|--------------|
| TC0600151  | 0.0000511 | 0.000204  | 1.45 | up | HIST1H2BC    |
| TC0201889  | 0.000015  | 0.0000763 | 1.45 | up | HS6ST1       |
| TC04r00004 | 0.0000066 | 0.0000417 | 1.45 | up | LOC389834    |
| TC0103208  | 0.0002757 | 0.000827  | 1.45 | up | NEK2         |
| TC1200032  | 0.0014    | 0.00342   | 1.45 | up | RAD51AP1     |
| TC0601698  | 0.0000787 | 0.000286  | 1.45 | up | RGS17        |
| TC1700017  | 0.0000092 | 0.0000526 | 1.45 | up | SERPINF1     |
| TC1800007  | 0.0000054 | 0.0000359 | 1.45 | up | TYMS         |
| TC1101010  | 0.0000869 | 0.000309  | 1.44 | up | ADAMTS15     |
| TC0500591  | 0.000067  | 0.000251  | 1.44 | up | ADRB2        |
| TC1500373  | 0.0002242 | 0.000692  | 1.44 | up | CCNB2        |
| TC0601006  | 0.0000657 | 0.000247  | 1.44 | up | CMAH         |
| TC0102349  | 0.0045472 | 0.00979   | 1.44 | up | DEPDC1       |
| TC0201643  | 0.00001   | 0.0000559 | 1.44 | up | LOXL3        |
| TC0401223  | 0.001542  | 0.00373   | 1.44 | up | MAD2L1       |
| TC1400756  | 0.0015495 | 0.00374   | 1.44 | up | NOVA1        |
| TC1000802  | 0.0004827 | 0.00134   | 1.44 | up | PTPLA        |
| TC1201246  | 0.000017  | 0.0000846 | 1.44 | up | RARG         |
| TC0200567  | 0.0000096 | 0.0000544 | 1.44 | up | SH3RF3       |
| TC0400123  | 0.000514  | 0.00141   | 1.44 | up | SLIT2        |
| TC1101228  | 0.0063392 | 0.0132    | 1.44 | up | SNORD14A     |
| TC1400754  | 0.0001001 | 0.000347  | 1.44 | up | STXBP6       |
| TC0202292  | 0.0018274 | 0.00431   | 1.43 | up | BARD1        |
| TC1001257  | 0.0002487 | 0.000757  | 1.43 | up | CALHM2       |
| TC1100272  | 0.0001458 | 0.000484  | 1.43 | up | CAT          |
| TC0800160  | 0.0003755 | 0.00108   | 1.43 | up | CDCA2        |
| TC1300347  | 0.0031336 | 0.00698   | 1.43 | up | CENPJ        |
| TC0Y00109  | 0.0091547 | 0.0184    | 1.43 | up | CRLF2        |
| TC0701733  | 0.0010959 | 0.00276   | 1.43 | up | EZH2         |
| TC0601628  | 0.0022324 | 0.00517   | 1.43 | up | FAM54A       |
| TC0200235  | 0.0001986 | 0.000626  | 1.43 | up | FLJ46838     |
| TC0900415  | 0.0002355 | 0.000721  | 1.43 | up | HABP4        |
| TC0500271  | 0.0003583 | 0.00104   | 1.43 | up | HEXB         |
| TC1000447  | 0.0011376 | 0.00286   | 1.43 | up | KIF11        |
| TC1200780  | 0.002848  | 0.00642   | 1.43 | up | KNTC1        |
| TC0101155  | 0.0000171 | 0.000085  | 1.43 | up | PEAR1        |
| TC1000968  | 0.0001896 | 0.000602  | 1.43 | up | PGBD3        |
| TC1200177  | 0.0001161 | 0.000396  | 1.43 | up | PLEKHA5      |
| TC1701048  | 0.0000086 | 0.00005   | 1.43 | up | PMP22        |
| TC2000524  | 0.000318  | 0.000937  | 1.43 | up | Q5VXX5_HUMAN |
| TC0600842  | 0.0000106 | 0.0000581 | 1.43 | up | ZDHHC14      |
| TC1600613  | 0.0003174 | 0.000936  | 1.42 | up | CENPN        |
| TC0101498  | 0.0007775 | 0.00203   | 1.42 | up | DTL          |
| TC0601052  | 0.0011077 | 0.00279   | 1.42 | up | HIST1H1B     |

|            |           |           |      |    |              |
|------------|-----------|-----------|------|----|--------------|
| TC0200073  | 0.0084084 | 0.017     | 1.42 | up | KCNS3        |
| TC1101279  | 0.0014982 | 0.00364   | 1.42 | up | KIF18A       |
| TC17r00008 | 0.0067056 | 0.0139    | 1.42 | up | KRTAP1-3     |
| TC1200536  | 0.0003595 | 0.00104   | 1.42 | up | NAV3         |
| TC0600481  | 0.0027737 | 0.00628   | 1.42 | up | PRIM2        |
| TC0901382  | 0.0000326 | 0.000145  | 1.42 | up | PTGES        |
| TC0701662  | 0.0000157 | 0.0000789 | 1.42 | up | PTN          |
| TC1500523  | 0.0064174 | 0.0134    | 1.42 | up | Q9UD29_HUMAN |
| TC0102233  | 0.0002629 | 0.000795  | 1.42 | up | STIL         |
| TC1200615  | 0.0007383 | 0.00194   | 1.42 | up | TMPO         |
| TC0103333  | 0.0000977 | 0.00034   | 1.41 | up | ABCB10       |
| TC0700185  | 0.0001987 | 0.000626  | 1.41 | up | ANLN         |
| TC1500295  | 0.0001991 | 0.000626  | 1.41 | up | B2M          |
| TC1701398  | 0.002867  | 0.00645   | 1.41 | up | BRCA1        |
| TC0801128  | 0.0089905 | 0.0181    | 1.41 | up | CCNE2        |
| TC0100539  | 0.0003852 | 0.0011    | 1.41 | up | CDKN2C       |
| TC0102109  | 0.0016226 | 0.00389   | 1.41 | up | CLSPN        |
| TC0800526  | 0.0000276 | 0.000128  | 1.41 | up | COL14A1      |
| TC0101458  | 0.0012289 | 0.00305   | 1.41 | up | FAM72A       |
| TC0401107  | 0.0002872 | 0.000856  | 1.41 | up | HSD17B11     |
| TC1000426  | 0.0000537 | 0.000211  | 1.41 | up | IFIT2        |
| TC0X00291  | 0.0009577 | 0.00245   | 1.41 | up | LOC550643    |
| TC1700614  | 0.015676  | 0.0297    | 1.41 | up | NOG          |
| TC1300144  | 0.0009573 | 0.00245   | 1.41 | up | PHF11        |
| TC0700807  | 0.0000248 | 0.000117  | 1.41 | up | PIP          |
| TC0301486  | 0.0029545 | 0.00663   | 1.41 | up | POLQ         |
| TC0600596  | 0.0003913 | 0.00112   | 1.41 | up | PRDM1        |
| TC1400118  | 0.0000281 | 0.000129  | 1.41 | up | PSME1        |
| TC1400561  | 0.0146007 | 0.0279    | 1.41 | up | Q6ZWF7_HUMAN |
| TC0101313  | 0.0006337 | 0.00171   | 1.41 | up | RALGPS2      |
| TC0102760  | 0.000024  | 0.000114  | 1.41 | up | S100A10      |
| TC2200189  | 0.0000333 | 0.000147  | 1.41 | up | SEC14L2      |
| TC1700308  | 0.0151566 | 0.0288    | 1.41 | up | SNORD42A     |
| TC0201821  | 0.0002351 | 0.000721  | 1.4  | up | BUB1         |
| TC0600982  | 0.0000991 | 0.000344  | 1.4  | up | DEK          |
| TC1000576  | 0.0000145 | 0.0000744 | 1.4  | up | DUSP5        |
| TC1700588  | 0.0000135 | 0.0000704 | 1.4  | up | EME1         |
| TC1700073  | 0.0000687 | 0.000255  | 1.4  | up | FAM64A       |
| TC1600455  | 0.0221781 | 0.0404    | 1.4  | up | MT1M         |
| TC1400295  | 0.0000444 | 0.000184  | 1.4  | up | MTHFD1       |
| TC0200033  | 0.000146  | 0.000484  | 1.4  | up | RRM2         |
| TC1300143  | 0.0035215 | 0.00773   | 1.4  | up | SETDB2       |
| TC1000560  | 0.0002657 | 0.000802  | 1.4  | up | SLK          |
| TC0500426  | 0.0070873 | 0.0146    | 1.4  | up | ZNF474       |



|           |           |          |      |    |              |
|-----------|-----------|----------|------|----|--------------|
| TC1500996 | 0.0007769 | 0.00203  | 1.39 | up | ADAM10       |
| TC0201287 | 0.0001393 | 0.000467 | 1.39 | up | CMPK2        |
| TC1700875 | 0.0000429 | 0.000178 | 1.39 | up | FAM101B      |
| TC0600332 | 0.0000234 | 0.000111 | 1.39 | up | FANCE        |
| TC0X01255 | 0.0000765 | 0.00028  | 1.39 | up | GPC3         |
| TC0301205 | 0.0002233 | 0.00069  | 1.39 | up | GPX1         |
| TC0601029 | 0.0009283 | 0.00238  | 1.39 | up | HIST1H3F     |
| TC0400977 | 0.0000626 | 0.000238 | 1.39 | up | IGFBP7       |
| TC0500505 | 0.0003694 | 0.00106  | 1.39 | up | KIF20A       |
| TC0102743 | 0.0206422 | 0.0379   | 1.39 | up | LOC100507670 |
| TC0800408 | 0.0086379 | 0.0174   | 1.39 | up | LRRCC1       |
| TC0601631 | 0.0004527 | 0.00128  | 1.39 | up | MAP3K5       |
| TC0X01287 | 0.0000656 | 0.000247 | 1.39 | up | MAP7D3       |
| TC1001350 | 0.0000633 | 0.00024  | 1.39 | up | MKI67        |
| TC0200973 | 0.0025816 | 0.00589  | 1.39 | up | SGOL2        |
| TC0800399 | 0.0016621 | 0.00397  | 1.39 | up | ZBTB10       |
| TC0102899 | 0.0004639 | 0.0013   | 1.38 | up | AIM2         |
| TC1200213 | 0.0128392 | 0.025    | 1.38 | up | ARNTL2       |
| TC1400477 | 0.0001723 | 0.000554 | 1.38 | up | BDKRB1       |
| TC1300142 | 0.0012267 | 0.00304  | 1.38 | up | CDADC1       |
| TC2200512 | 0.0002784 | 0.000833 | 1.38 | up | CHCHD10      |
| TC1500370 | 0.012216  | 0.0238   | 1.38 | up | FAM63B       |
| TC1400709 | 0.000251  | 0.000763 | 1.38 | up | HAUS4        |
| TC0102704 | 0.0011797 | 0.00294  | 1.38 | up | HIST2H2BF    |
| TC1700483 | 0.0002091 | 0.000653 | 1.38 | up | IFI35        |
| TC1500437 | 0.0017357 | 0.00413  | 1.38 | up | KIF23        |
| TC0X00766 | 0.0000388 | 0.000166 | 1.38 | up | MID1         |
| TC1200641 | 0.0128688 | 0.025    | 1.38 | up | PARPBP       |
| TC0100058 | 0.0003337 | 0.000974 | 1.38 | up | PRDM16       |
| TC1900637 | 0.0002068 | 0.000647 | 1.38 | up | Q6P662_HUMAN |
| TC2000721 | 0.0051032 | 0.0109   | 1.38 | up | RBL1         |
| TC0400052 | 0.0005397 | 0.00148  | 1.38 | up | STK32B       |
| TC1500572 | 0.000339  | 0.000987 | 1.38 | up | TM6SF1       |
| TC0500010 | 0.000169  | 0.000546 | 1.38 | up | TRIP13       |
| TC0X00069 | 0.0007004 | 0.00186  | 1.38 | up | TXLNG        |
| TC1600634 | 0.0001645 | 0.000535 | 1.38 | up | WFDC1        |
| TC0X01072 | 0.0043381 | 0.00936  | 1.37 | up | hsa-mir-361  |
| TC1401080 | 0.0000623 | 0.000238 | 1.37 | up | LGMN         |
| TC0500441 | 0.0012393 | 0.00307  | 1.37 | up | LMNB1        |
| TC0601328 | 0.000461  | 0.00129  | 1.37 | up | MCM3         |
| TC0X00742 | 0.0006096 | 0.00165  | 1.37 | up | PRKX         |
| TC0X00947 | 0.0004596 | 0.00129  | 1.37 | up | SMC1A        |
| TC1101493 | 0.0043024 | 0.0093   | 1.37 | up | SNORD31      |
| TC0900420 | 0.0016532 | 0.00396  | 1.37 | up | TDRD7        |

|            |           |          |      |    |              |
|------------|-----------|----------|------|----|--------------|
| TC1901188  | 0.0002182 | 0.000676 | 1.37 | up | ZNF823       |
| TC1101668  | 0.0002066 | 0.000647 | 1.36 | up | ARRB1        |
| TC0801228  | 0.0070914 | 0.0146   | 1.36 | up | ATAD2        |
| TC1600228  | 0.0012842 | 0.00317  | 1.36 | up | CCP110       |
| TC1700433  | 0.0026311 | 0.00599  | 1.36 | up | CDC6         |
| TC1200634  | 0.0006841 | 0.00182  | 1.36 | up | CHPT1        |
| TC0Xr00009 | 0.0035314 | 0.00774  | 1.36 | up | CRLF2        |
| TC0400313  | 0.0016923 | 0.00404  | 1.36 | up | CXCL6        |
| TC0202359  | 0.0002672 | 0.000806 | 1.36 | up | DOCK10       |
| TC2200616  | 0.0007993 | 0.00209  | 1.36 | up | LARGE        |
| TC0100712  | 0.000613  | 0.00165  | 1.36 | up | LRRRC8C      |
| TC1201441  | 0.0005671 | 0.00154  | 1.36 | up | LUM          |
| TC2100034  | 0.0004218 | 0.0012   | 1.36 | up | NCAM2        |
| TC0701805  | 0.0055392 | 0.0117   | 1.36 | up | NCAPG2       |
| TC0200492  | 0.0002552 | 0.000773 | 1.36 | up | NCAPH        |
| TC0300983  | 0.0081201 | 0.0165   | 1.36 | up | OXTR         |
| TC0600297  | 0.0061576 | 0.0129   | 1.36 | up | PSMB9        |
| TC0103039  | 0.0222606 | 0.0405   | 1.36 | up | Q6NWZ2_HUMAN |
| TC0201668  | 0.0005401 | 0.00148  | 1.36 | up | Q86V40_HUMAN |
| TC1501054  | 0.0003366 | 0.00098  | 1.36 | up | SNAPC5       |
| TC1200989  | 0.0459835 | 0.0767   | 1.36 | up | TAS2R42      |
| TC1201314  | 0.0031825 | 0.00708  | 1.36 | up | TMEM194A     |
| TC0701590  | 0.0032073 | 0.00713  | 1.35 | up | AASS         |
| TC0700644  | 0.0069383 | 0.0143   | 1.35 | up | C7orf58      |
| TC0401233  | 0.0002095 | 0.000653 | 1.35 | up | CCNA2        |
| TC1200416  | 0.0004825 | 0.00134  | 1.35 | up | CDK2         |
| TC1500607  | 0.0027169 | 0.00617  | 1.35 | up | FANCI        |
| TC0100793  | 0.0056164 | 0.0119   | 1.35 | up | GPSM2        |
| TC0601024  | 0.0038031 | 0.0083   | 1.35 | up | HIST1H3F     |
| TC0600715  | 0.0017165 | 0.00409  | 1.35 | up | LAMA2        |
| TC0600259  | 0.0097521 | 0.0195   | 1.35 | up | NM_181717.2  |
| TC1201187  | 0.0002326 | 0.000714 | 1.35 | up | RACGAP1      |
| TC0300755  | 0.0025529 | 0.00583  | 1.35 | up | SMC4         |
| TC1700309  | 0.0316336 | 0.0554   | 1.35 | up | SNORD4B      |
| TC1600183  | 0.0000988 | 0.000343 | 1.35 | up | SNX29        |
| TC0201667  | 0.0003871 | 0.00111  | 1.35 | up | SUCLG1       |
| TC0600981  | 0.0079795 | 0.0162   | 1.35 | up | TPMT         |
| TC0700737  | 0.0012861 | 0.00317  | 1.35 | up | TRIM24       |
| TC1101651  | 0.000608  | 0.00164  | 1.35 | up | UCP2         |
| TC1700071  | 0.000161  | 0.000527 | 1.35 | up | WSCD1        |
| TC0800104  | 0.0011509 | 0.00288  | 1.35 | up | ZDHHC2       |
| TC0100735  | 0.0237765 | 0.0429   | 1.34 | up | CCDC18       |
| TC0601030  | 0.0009229 | 0.00237  | 1.34 | up | HIST1H3F     |
| TC0601055  | 0.0016138 | 0.00387  | 1.34 | up | HIST1H3F     |

|           |           |          |      |    |              |
|-----------|-----------|----------|------|----|--------------|
| TC1101956 | 0.0002496 | 0.000759 | 1.34 | up | KIRREL3      |
| TC1800299 | 0.004907  | 0.0105   | 1.34 | up | METTL4       |
| TC0800527 | 0.0191411 | 0.0355   | 1.34 | up | MTBP         |
| TC0600538 | 0.0003204 | 0.000942 | 1.34 | up | NT5E         |
| TC0102257 | 0.0001434 | 0.000478 | 1.34 | up | ORC1         |
| TC1300660 | 0.000825  | 0.00214  | 1.34 | up | PCID2        |
| TC0300341 | 0.0001946 | 0.000615 | 1.34 | up | PTPRG        |
| TC0500663 | 0.0005473 | 0.00149  | 1.34 | up | PTTG1        |
| TC0301263 | 0.0015693 | 0.00378  | 1.34 | up | SFMBT1       |
| TC1101457 | 0.0009598 | 0.00245  | 1.34 | up | SLC15A3      |
| TC0101131 | 0.0000878 | 0.000312 | 1.34 | up | SYT11        |
| TC1900520 | 0.0011393 | 0.00286  | 1.34 | up | ZFP36        |
| TC0600480 | 0.0011424 | 0.00287  | 1.33 | up | BAG2         |
| TC0500232 | 0.0003296 | 0.000965 | 1.33 | up | CCNB1        |
| TC0300799 | 0.006006  | 0.0126   | 1.33 | up | ECT2         |
| TC1400770 | 0.0030941 | 0.0069   | 1.33 | up | HEATR5A      |
| TC1200040 | 0.0495194 | 0.082    | 1.33 | up | KCNA1        |
| TC0101057 | 0.002933  | 0.00659  | 1.33 | up | LCE2D        |
| TC1700881 | 0.0038912 | 0.00848  | 1.33 | up | LOC100130876 |
| TC1500546 | 0.0298671 | 0.0526   | 1.33 | up | MESDC1       |
| TC0301639 | 0.0007979 | 0.00208  | 1.33 | up | PLSCR1       |
| TC1400831 | 0.0172715 | 0.0323   | 1.33 | up | POLE2        |
| TC1901157 | 0.0123967 | 0.0242   | 1.33 | up | S1PR2        |
| TC0101488 | 0.0000903 | 0.000319 | 1.33 | up | SERTAD4      |
| TC1800181 | 0.0111482 | 0.022    | 1.33 | up | SKA1         |
| TC0401267 | 0.0063934 | 0.0133   | 1.33 | up | SLC7A11      |
| TC1101138 | 0.0002314 | 0.000711 | 1.33 | up | TRIM5        |
| TC2200235 | 0.0015697 | 0.00378  | 1.32 | up | APOL6        |
| TC0400585 | 0.0030629 | 0.00685  | 1.32 | up | ARHGAP10     |
| TC0X00360 | 0.0158811 | 0.03     | 1.32 | up | BMP2KL       |
| TC0600160 | 0.0005879 | 0.00159  | 1.32 | up | BTN3A1       |
| TC0800075 | 0.0183259 | 0.0342   | 1.32 | up | C8orf49      |
| TC0300461 | 0.0015146 | 0.00367  | 1.32 | up | CEP97        |
| TC0500714 | 0.0065825 | 0.0137   | 1.32 | up | CREBRF       |
| TC0700455 | 0.0069089 | 0.0143   | 1.32 | up | DBF4         |
| TC0400319 | 0.0170955 | 0.0321   | 1.32 | up | EREG         |
| TC0200233 | 0.0139402 | 0.0269   | 1.32 | up | FOXN2        |
| TC1701711 | 0.000827  | 0.00215  | 1.32 | up | RNF157       |
| TC0200244 | 0.0001908 | 0.000605 | 1.32 | up | SPTBN1       |
| TC1000423 | 0.000488  | 0.00135  | 1.32 | up | STAMBPL1     |
| TC1701737 | 0.0001511 | 0.000498 | 1.32 | up | TK1          |
| TC0500318 | 0.0004481 | 0.00126  | 1.32 | up | VCAN         |
| TC1101474 | 0.0002268 | 0.000699 | 1.31 | up | AHNAK        |
| TC1701373 | 0.0001435 | 0.000478 | 1.31 | up | DHX58        |

|           |           |          |      |    |             |
|-----------|-----------|----------|------|----|-------------|
| TC0102836 | 0.0007365 | 0.00194  | 1.31 | up | ERVK-7      |
| TC1400863 | 0.0054663 | 0.0116   | 1.31 | up | GNPNAT1     |
| TC0100898 | 0.0074605 | 0.0153   | 1.31 | up | HIST2H3D    |
| TC1200598 | 0.0477276 | 0.0794   | 1.31 | up | hsa-mir-331 |
| TC0401086 | 0.0048572 | 0.0104   | 1.31 | up | LIN54       |
| TC0501098 | 0.0030086 | 0.00673  | 1.31 | up | MTX3        |
| TC0301070 | 0.0050289 | 0.0107   | 1.31 | up | NEK10       |
| TC1400529 | 0.0051469 | 0.011    | 1.31 | up | NR_003197.1 |
| TC0103286 | 0.0019247 | 0.00452  | 1.31 | up | PARP1       |
| TC1800327 | 0.0005258 | 0.00144  | 1.31 | up | PPP4R1      |
| TC1400910 | 0.0049517 | 0.0106   | 1.31 | up | SGPP1       |
| TC0401321 | 0.0011409 | 0.00286  | 1.31 | up | SH3D19      |
| TC1000264 | 0.0350967 | 0.0607   | 1.31 | up | TFAM        |
| TC0100653 | 0.0005321 | 0.00146  | 1.31 | up | TNNI3K      |
| TC1500286 | 0.0018535 | 0.00437  | 1.31 | up | WDR76       |
| TC1901357 | 0.0116257 | 0.0228   | 1.31 | up | ZNF429      |
| TC0201953 | 0.002392  | 0.00548  | 1.31 | up | ZRANB3      |
| TC1800378 | 0.000255  | 0.000773 | 1.3  | up | ANKRD29     |
| TC0701537 | 0.0002359 | 0.000722 | 1.3  | up | ATXN7L1     |
| TC0600158 | 0.0017524 | 0.00416  | 1.3  | up | BTN3A2      |
| TC0X00808 | 0.0062603 | 0.0131   | 1.3  | up | EIF1AX      |
| TC0601053 | 0.0008611 | 0.00223  | 1.3  | up | HIST1H3F    |
| TC0601016 | 0.0163779 | 0.0309   | 1.3  | up | HIST1H4B    |
| TC0301646 | 0.0078834 | 0.0161   | 1.3  | up | HLTF        |
| TC0X00328 | 0.0027293 | 0.00619  | 1.3  | up | KIF4B       |
| TC1200250 | 0.0052417 | 0.0111   | 1.3  | up | LRRK2       |
| TC1300424 | 0.0006257 | 0.00169  | 1.3  | up | MRPS31      |
| TC1101179 | 0.0034106 | 0.00751  | 1.3  | up | NLRP10      |
| TC0301045 | 0.0003854 | 0.0011   | 1.3  | up | RFTN1       |
| TC0102788 | 0.0048551 | 0.0104   | 1.3  | up | S100A3      |
| TC1701691 | 0.0004819 | 0.00134  | 1.3  | up | SLC25A19    |
| TC0103012 | 0.0024386 | 0.00558  | 1.3  | up | SNORD74     |
| TC1701170 | 0.0009298 | 0.00238  | 1.3  | up | SPAG5       |
| TC0800543 | 0.0037946 | 0.00829  | 1.3  | up | TRMT12      |
| TC0200177 | 0.000565  | 0.00154  | 1.3  | up | VIT         |
| TC0500391 | 0.0069832 | 0.0144   | 1.29 | up | CAMK4       |
| TC0800828 | 0.0010017 | 0.00255  | 1.29 | up | CCDC25      |
| TC0301174 | 0.0091326 | 0.0184   | 1.29 | up | CDC25A      |
| TC1300426 | 0.0012779 | 0.00316  | 1.29 | up | ELF1        |
| TC1901747 | 0.0364051 | 0.0627   | 1.29 | up | FLJ30403    |
| TC1701330 | 0.0003998 | 0.00114  | 1.29 | up | KRTAP1-3    |
| TC0301757 | 0.0021909 | 0.00509  | 1.29 | up | NCEH1       |
| TC0200584 | 0.0027523 | 0.00623  | 1.29 | up | POLR1B      |
| TC0301404 | 0.0498442 | 0.0824   | 1.29 | up | SENP7       |

|           |           |         |      |    |              |
|-----------|-----------|---------|------|----|--------------|
| TC0700500 | 0.037042  | 0.0635  | 1.28 | up | ACN9         |
| TC0601657 | 0.0017108 | 0.00408 | 1.28 | up | ADAT2        |
| TC1901237 | 0.0036958 | 0.00809 | 1.28 | up | ASF1B        |
| TC2000849 | 0.0022284 | 0.00516 | 1.28 | up | AURKA        |
| TC0300441 | 0.002597  | 0.00592 | 1.28 | up | C3orf26      |
| TC0400714 | 0.0293294 | 0.0517  | 1.28 | up | CCDC111      |
| TC0102974 | 0.0015598 | 0.00376 | 1.28 | up | DPT          |
| TC0100788 | 0.0303435 | 0.0533  | 1.28 | up | FAM102B      |
| TC0600157 | 0.0040402 | 0.00879 | 1.28 | up | HIST1H2BO    |
| TC1500169 | 0.0032302 | 0.00716 | 1.28 | up | KLF13        |
| TC0400845 | 0.005722  | 0.0121  | 1.28 | up | LCORL        |
| TC0800697 | 0.0178834 | 0.0334  | 1.28 | up | LOC728731    |
| TC1201413 | 0.0027533 | 0.00623 | 1.28 | up | PAWR         |
| TC2000533 | 0.0022239 | 0.00516 | 1.28 | up | PCNA         |
| TC0300490 | 0.0014602 | 0.00356 | 1.28 | up | PVRL3        |
| TC0900171 | 0.0012076 | 0.003   | 1.28 | up | RECK         |
| TC0100775 | 0.0101784 | 0.0203  | 1.28 | up | S1PR1        |
| TC0100912 | 0.0013973 | 0.00341 | 1.28 | up | SRGAP2P2     |
| TC0100655 | 0.0020751 | 0.00484 | 1.28 | up | TYW3         |
| TC0401197 | 0.0453476 | 0.0758  | 1.27 | up | C4orf21      |
| TC0401163 | 0.0131433 | 0.0255  | 1.27 | up | CENPE        |
| TC0103011 | 0.0364058 | 0.0627  | 1.27 | up | CENPL        |
| TC1600924 | 0.0251799 | 0.0451  | 1.27 | up | ERI2         |
| TC0501440 | 0.002831  | 0.00638 | 1.27 | up | GEMIN5       |
| TC0601472 | 0.0187243 | 0.0348  | 1.27 | up | MMS22L       |
| TC1300101 | 0.021856  | 0.0398  | 1.27 | up | NAA16        |
| TC1400553 | 0.0119889 | 0.0234  | 1.27 | up | NR_003217.1  |
| TC1400976 | 0.0009079 | 0.00233 | 1.27 | up | NUMB         |
| TC1200482 | 0.0116132 | 0.0228  | 1.27 | up | RASSF3       |
| TC0500425 | 0.008642  | 0.0174  | 1.27 | up | SRFBP1       |
| TC1400890 | 0.0222332 | 0.0404  | 1.27 | up | TIMM9        |
| TC0102998 | 0.0053602 | 0.0114  | 1.27 | up | VAMP4        |
| TC1101665 | 0.0033152 | 0.00732 | 1.27 | up | XRRA1        |
| TC1500798 | 0.007001  | 0.0144  | 1.26 | up | FMN1         |
| TC0500673 | 0.0236522 | 0.0428  | 1.26 | up | HMMR         |
| TC0X00282 | 0.0116816 | 0.0229  | 1.26 | up | MAGEH1       |
| TC0900176 | 0.0140195 | 0.027   | 1.26 | up | MELK         |
| TC0700597 | 0.0030847 | 0.00688 | 1.26 | up | MLL5         |
| TC0800736 | 0.0054042 | 0.0114  | 1.26 | up | PINX1        |
| TC1000654 | 0.0204874 | 0.0377  | 1.26 | up | Q499Y3_HUMAN |
| TC1200341 | 0.0026559 | 0.00604 | 1.26 | up | SLC4A8       |
| TC1000555 | 0.0139993 | 0.027   | 1.26 | up | TAF5         |
| TC1100829 | 0.0143442 | 0.0275  | 1.26 | up | ZC3H12C      |
| TC0X00423 | 0.02607   | 0.0466  | 1.25 | up | CENPI        |

|            |           |         |      |    |              |
|------------|-----------|---------|------|----|--------------|
| TC0600894  | 0.006484  | 0.0135  | 1.25 | up | EXOC2        |
| TC0300039  | 0.0139208 | 0.0269  | 1.25 | up | FANCD2       |
| TC0200071  | 0.0193468 | 0.0358  | 1.25 | up | GEN1         |
| TC0X00121  | 0.003421  | 0.00752 | 1.25 | up | GK           |
| TC0401196  | 0.0096259 | 0.0193  | 1.25 | up | LOC91431     |
| TC0501442  | 0.0242936 | 0.0437  | 1.25 | up | NP10_HUMAN   |
| TC0900789  | 0.0063706 | 0.0133  | 1.25 | up | PSIP1        |
| TC0601351  | 0.0041934 | 0.00908 | 1.25 | up | RAB23        |
| TC1800284  | 0.0056423 | 0.0119  | 1.25 | up | RBFA         |
| TC2200196  | 0.0051581 | 0.011   | 1.25 | up | SLC35E4      |
| TC0700759  | 0.0448764 | 0.0751  | 1.25 | up | TAS2R4       |
| TC2000559  | 0.0211331 | 0.0387  | 1.24 | up | C20orf61     |
| TC0901299  | 0.0145588 | 0.0278  | 1.24 | up | C5           |
| TC0200213  | 0.0276566 | 0.0492  | 1.24 | up | CAMKMT       |
| TC0301570  | 0.0046076 | 0.00991 | 1.24 | up | CPNE4        |
| TC1001219  | 0.0113309 | 0.0223  | 1.24 | up | CWF19L1      |
| TC1400874  | 0.0107944 | 0.0214  | 1.24 | up | DLGAP5       |
| TC0800248  | 0.039416  | 0.0671  | 1.24 | up | GINS4        |
| TC1100770  | 0.0195666 | 0.0362  | 1.24 | up | KDM4D        |
| TC0500253  | 0.0323029 | 0.0564  | 1.24 | up | MCCC2        |
| TC0800720  | 0.0400393 | 0.068   | 1.24 | up | MFHAS1       |
| TC1900975  | 0.0148702 | 0.0283  | 1.24 | up | MIER2        |
| TC1500773  | 0.0245817 | 0.0442  | 1.24 | up | Q6ZSR3_HUMAN |
| TC0202078  | 0.0407669 | 0.0692  | 1.24 | up | SPC25        |
| TC1000826  | 0.0066551 | 0.0138  | 1.23 | up | ARHGAP21     |
| TC0801173  | 0.0126059 | 0.0245  | 1.23 | up | AZIN1        |
| TC0501322  | 0.0227321 | 0.0412  | 1.23 | up | CDC25C       |
| TC1200266  | 0.0065527 | 0.0136  | 1.23 | up | IRAK4        |
| TC1400266  | 0.0133072 | 0.0258  | 1.23 | up | KIAA0586     |
| TC17r00007 | 0.0130256 | 0.0253  | 1.23 | up | KRTAP1-1     |
| TC0400171  | 0.0174366 | 0.0326  | 1.23 | up | LIAS         |
| TC0100673  | 0.0042205 | 0.00913 | 1.23 | up | NEXN         |
| TC0801196  | 0.0370025 | 0.0635  | 1.23 | up | NUDCD1       |
| TC0100665  | 0.0191573 | 0.0355  | 1.23 | up | ST6GALNAC5   |
| TC1500421  | 0.0141778 | 0.0273  | 1.23 | up | ZWILCH       |
| TC1701199  | 0.0049133 | 0.0105  | 1.22 | up | BLMH         |
| TC0800053  | 0.0320171 | 0.056   | 1.22 | up | ERI1         |
| TC1900846  | 0.0349906 | 0.0606  | 1.22 | up | hsa-mir-371  |
| TC2000060  | 0.0166935 | 0.0314  | 1.22 | up | MCM8         |
| TC0200228  | 0.049067  | 0.0813  | 1.22 | up | MSH2         |
| TC1100664  | 0.0069969 | 0.0144  | 1.22 | up | POLD3        |
| TC2000734  | 0.0187632 | 0.0349  | 1.22 | up | SNORA71A     |
| TC1700397  | 0.0093668 | 0.0188  | 1.22 | up | TADA2A       |
| TC0601087  | 0.0479317 | 0.0797  | 1.21 | up | HCG4         |

|           |           |         |      |      |             |
|-----------|-----------|---------|------|------|-------------|
| TC0X00168 | 0.0367424 | 0.0632  | 1.21 | up   | KDM6A       |
| TC0900528 | 0.0105858 | 0.021   | 1.21 | up   | MRRF        |
| TC1400103 | 0.031174  | 0.0547  | 1.21 | up   | NGDN        |
| TC1200537 | 0.0105859 | 0.021   | 1.21 | up   | SYT1        |
| TC0102446 | 0.0153143 | 0.029   | 1.21 | up   | TMED5       |
| TC1900601 | 0.033431  | 0.0582  | 1.21 | up   | ZNF284      |
| TC0400343 | 0.0203805 | 0.0375  | 1.2  | up   | BMP2K       |
| TC0701122 | 0.0263038 | 0.0469  | 1.2  | up   | DPY19L1     |
| TC0200802 | 0.0102548 | 0.0205  | 1.2  | up   | GPD2        |
| TC0700710 | 0.0288022 | 0.0509  | 1.2  | up   | hsa-mir-335 |
| TC0103133 | 0.0111861 | 0.022   | 1.2  | up   | KLHL12      |
| TC0102351 | 0.0268228 | 0.0478  | 1.2  | up   | LRRC40      |
| TC1101773 | 0.0182075 | 0.034   | 1.2  | up   | MMP8        |
| TC2000671 | 0.0231677 | 0.042   | 1.2  | up   | PXMP4       |
| TC2000306 | 0.0236774 | 0.0428  | 1.2  | up   | STK4        |
| TC0200996 | 0.0116063 | 0.0228  | 1.2  | up   | STRADB      |
| TC0400497 | 0.0172415 | 0.0323  | 1.2  | up   | USP53       |
| TC0103217 | 0.0412055 | 0.0699  | 1.19 | up   | BATF3       |
| TC2100076 | 0.0121438 | 0.0237  | 1.19 | up   | FAM176C     |
| TC0200860 | 0.042106  | 0.0712  | 1.19 | up   | HAT1        |
| TC0800816 | 0.0306089 | 0.0538  | 1.19 | up   | KCTD9       |
| TC0100257 | 0.037821  | 0.0647  | 1.19 | up   | PITHD1      |
| TC0202405 | 0.0377661 | 0.0647  | 1.18 | up   | DNAJB3      |
| TC0301560 | 0.0363855 | 0.0627  | 1.18 | up   | PIK3R4      |
| TC0X00590 | 0.0139676 | 0.0269  | 1.18 | up   | SLC9A6      |
| TC0901094 | 0.0286086 | 0.0506  | 1.18 | up   | ZCCHC6      |
| TC1201648 | 0.0442831 | 0.0743  | 1.18 | up   | ZCCHC8      |
| TC0200200 | 0.0457928 | 0.0764  | 1.17 | up   | EML4        |
| TC1200158 | 0.0427668 | 0.0721  | 1.16 | up   | EMP1        |
| TC1401095 | 0.0431171 | 0.0726  | 0.86 | down | SERPINA1    |
| TC0101814 | 0.0327383 | 0.0572  | 0.85 | down | PLEKHG5     |
| TC1101205 | 0.045273  | 0.0757  | 0.84 | down | MRVI1       |
| TC0202043 | 0.0317314 | 0.0555  | 0.83 | down | RBMS1       |
| TC1100940 | 0.015758  | 0.0298  | 0.82 | down | C11orf63    |
| TC0701147 | 0.0473629 | 0.0788  | 0.82 | down | FAM183B     |
| TC1600119 | 0.0189381 | 0.0352  | 0.81 | down | FLJ39639    |
| TC0401460 | 0.0279823 | 0.0496  | 0.8  | down | CCDC110     |
| TC0800409 | 0.0107673 | 0.0213  | 0.8  | down | E2F5        |
| TC0200023 | 0.0038719 | 0.00844 | 0.8  | down | ID2         |
| TC0301465 | 0.0204696 | 0.0377  | 0.8  | down | LSAMP       |
| TC0300725 | 0.015081  | 0.0286  | 0.8  | down | RAP2B       |
| TC0700666 | 0.0296581 | 0.0522  | 0.8  | down | SND1-IT1    |
| TC0300420 | 0.0046992 | 0.0101  | 0.79 | down | ARL6        |
| TC0103140 | 0.0108289 | 0.0214  | 0.79 | down | CHI3L1      |

|           |           |         |      |      |              |
|-----------|-----------|---------|------|------|--------------|
| TC1100678 | 0.0087947 | 0.0177  | 0.79 | down | DGAT2        |
| TC0103220 | 0.0019325 | 0.00453 | 0.79 | down | FLVCR1-AS1   |
| TC0600154 | 0.0034153 | 0.00751 | 0.79 | down | HIST1H3F     |
| TC2200090 | 0.0339412 | 0.0591  | 0.79 | down | IGLV11-55    |
| TC1900974 | 0.0023402 | 0.00538 | 0.79 | down | PPAP2C       |
| TC0601269 | 0.0034069 | 0.0075  | 0.79 | down | PRPH2        |
| TC1700564 | 0.0417751 | 0.0707  | 0.79 | down | Q96FJ8_HUMAN |
| TC1000751 | 0.0112937 | 0.0222  | 0.79 | down | SFMBT2       |
| TC1901846 | 0.0128118 | 0.0249  | 0.79 | down | ZNF835       |
| TC1400748 | 0.0350746 | 0.0607  | 0.78 | down | CBLN3        |
| TC2100251 | 0.0116627 | 0.0228  | 0.78 | down | CYYR1        |
| TC1900541 | 0.0135449 | 0.0262  | 0.78 | down | ITPKC        |
| TC0X00908 | 0.001986  | 0.00465 | 0.78 | down | KCND1        |
| TC0102079 | 0.0167139 | 0.0314  | 0.78 | down | MARCKSL1     |
| TC1200462 | 0.0079037 | 0.0161  | 0.78 | down | METTL21B     |
| TC0800004 | 0.0279597 | 0.0496  | 0.78 | down | Q8NB26_HUMAN |
| TC1500606 | 0.0030664 | 0.00685 | 0.77 | down | ABHD2        |
| TC0500954 | 0.0081884 | 0.0166  | 0.77 | down | ANXA2R       |
| TC0400249 | 0.0109378 | 0.0216  | 0.77 | down | ARL9         |
| TC1501024 | 0.0111719 | 0.022   | 0.77 | down | DAPK2        |
| TC1701483 | 0.0075904 | 0.0155  | 0.77 | down | HOXB6        |
| TC0301308 | 0.0018524 | 0.00437 | 0.77 | down | ID2B         |
| TC0400520 | 0.0012008 | 0.00299 | 0.77 | down | INTU         |
| TC0600756 | 0.0017554 | 0.00416 | 0.77 | down | KIAA1244     |
| TC0102756 | 0.0280248 | 0.0497  | 0.77 | down | LOC100132111 |
| TC2200046 | 0.0018043 | 0.00427 | 0.77 | down | LOC729444    |
| TC0201021 | 0.0142909 | 0.0274  | 0.77 | down | NBEAL1       |
| TC0900558 | 0.0097982 | 0.0196  | 0.77 | down | OLFML2A      |
| TC1700857 | 0.0044333 | 0.00956 | 0.77 | down | Q6ZNS0_HUMAN |
| TC0700003 | 0.0293603 | 0.0517  | 0.77 | down | Q8N814_HUMAN |
| TC1300653 | 0.007606  | 0.0155  | 0.77 | down | RAB20        |
| TC0700029 | 0.0010718 | 0.0027  | 0.77 | down | SDK1         |
| TC0Y00002 | 0.0075546 | 0.0154  | 0.77 | down | SHOX         |
| TC1500356 | 0.0030655 | 0.00685 | 0.77 | down | TEX9         |
| TC1400355 | 0.0083767 | 0.017   | 0.76 | down | ACOT4        |
| TC1700115 | 0.0080136 | 0.0163  | 0.76 | down | ALOX15B      |
| TC1601311 | 0.0183724 | 0.0342  | 0.76 | down | C16orf74     |
| TC0300407 | 0.0089021 | 0.0179  | 0.76 | down | EPHA3        |
| TC1700642 | 0.0003946 | 0.00112 | 0.76 | down | GDPD1        |
| TC0900205 | 0.0378038 | 0.0647  | 0.76 | down | LOC728903    |
| TC0501317 | 0.0062593 | 0.0131  | 0.76 | down | NME5         |
| TC1101116 | 0.039174  | 0.0667  | 0.76 | down | OR51G2       |
| TC2000021 | 0.0067152 | 0.0139  | 0.76 | down | SIRPA        |
| TC0501407 | 0.0133457 | 0.0258  | 0.75 | down | ARSI         |



|           |           |          |      |      |                |
|-----------|-----------|----------|------|------|----------------|
| TC0201018 | 0.0004325 | 0.00123  | 0.75 | down | FAM117B        |
| TC0300743 | 0.0021718 | 0.00505  | 0.75 | down | NM_001099777.1 |
| TC1400532 | 0.0061733 | 0.0129   | 0.75 | down | NR_003199.1    |
| TC2100357 | 0.0153061 | 0.029    | 0.75 | down | PLAC4          |
| TC0401130 | 0.0016518 | 0.00395  | 0.75 | down | UNC5C          |
| TC0202354 | 0.0005016 | 0.00139  | 0.74 | down | AP1S3          |
| TC1101815 | 0.00066   | 0.00177  | 0.74 | down | ARHGAP20       |
| TC1000793 | 0.0070947 | 0.0146   | 0.74 | down | C1QL3          |
| TC1500247 | 0.001491  | 0.00362  | 0.74 | down | CHAC1          |
| TC1200961 | 0.0003442 | 0.000999 | 0.74 | down | CLEC2B         |
| TC0300421 | 0.0012024 | 0.00299  | 0.74 | down | CRYBG3         |
| TC0900989 | 0.0354718 | 0.0613   | 0.74 | down | FAM27A         |
| TC1100997 | 0.0001486 | 0.000491 | 0.74 | down | FLI1           |
| TC0700670 | 0.0004734 | 0.00132  | 0.74 | down | HILPDA         |
| TC0601022 | 0.0227302 | 0.0412   | 0.74 | down | HIST1H2BC      |
| TC0201818 | 0.0000956 | 0.000334 | 0.74 | down | LIMS3          |
| TC2100173 | 0.0152341 | 0.0289   | 0.74 | down | LRRC3          |
| TC2000244 | 0.0022777 | 0.00526  | 0.74 | down | NNAT           |
| TC1900512 | 0.0007685 | 0.00201  | 0.74 | down | PAPL           |
| TC0202122 | 0.0023434 | 0.00538  | 0.74 | down | Q8NAT4_HUMAN   |
| TC0101376 | 0.0032945 | 0.00728  | 0.74 | down | RGS2           |
| TC1700074 | 0.0027456 | 0.00622  | 0.74 | down | TXNDC17        |
| TC2200491 | 0.0002804 | 0.000839 | 0.74 | down | ZNF280B        |
| TC0200833 | 0.0000278 | 0.000128 | 0.73 | down | B3GALT1        |
| TC0800487 | 0.0003309 | 0.000967 | 0.73 | down | BAALC          |
| TC0X01111 | 0.0000618 | 0.000236 | 0.73 | down | BEX1           |
| TC1400363 | 0.0003182 | 0.000937 | 0.73 | down | C14orf45       |
| TC0201673 | 0.0003832 | 0.0011   | 0.73 | down | CAPG           |
| TC1200471 | 0.0076618 | 0.0156   | 0.73 | down | hsa-let-7i     |
| TC0X00760 | 0.0005051 | 0.00139  | 0.73 | down | KAL1           |
| TC0500570 | 0.0012229 | 0.00304  | 0.73 | down | KCTD16         |
| TC1101342 | 0.0001333 | 0.00045  | 0.73 | down | LRP4           |
| TC0201340 | 0.0000501 | 0.0002   | 0.73 | down | MATN3          |
| TC0201158 | 0.0002931 | 0.000871 | 0.73 | down | SP140          |
| TC2000421 | 0.0047569 | 0.0102   | 0.72 | down | C20orf197      |
| TC0900232 | 0.0039872 | 0.00868  | 0.72 | down | FAM27A         |
| TC1001152 | 0.0000387 | 0.000166 | 0.72 | down | HTR7           |
| TC1201403 | 0.0002582 | 0.000781 | 0.72 | down | PHLDA1         |
| TC2100412 | 0.0000632 | 0.00024  | 0.72 | down | POFUT2         |
| TC2000369 | 0.0000514 | 0.000204 | 0.72 | down | PTPN1          |
| TC0X00070 | 0.0001822 | 0.000582 | 0.72 | down | REPS2          |
| TC0400717 | 0.000208  | 0.00065  | 0.72 | down | SLC25A4        |
| TC0100132 | 0.0002117 | 0.000658 | 0.72 | down | TNFRSF1B       |
| TC0101229 | 0.0001216 | 0.000413 | 0.72 | down | UAP1           |

|           |           |           |      |      |              |
|-----------|-----------|-----------|------|------|--------------|
| TC1900779 | 0.0007427 | 0.00195   | 0.72 | down | ZNF528       |
| TC2100138 | 0.0000332 | 0.000147  | 0.71 | down | BACE2        |
| TC1200190 | 0.0001578 | 0.000519  | 0.71 | down | C12orf39     |
| TC0300687 | 0.0008959 | 0.00231   | 0.71 | down | C3orf58      |
| TC1701061 | 0.0011568 | 0.0029    | 0.71 | down | CENPV        |
| TC1200079 | 0.0000415 | 0.000174  | 0.71 | down | CLSTN3       |
| TC0M00015 | 0.0145217 | 0.0278    | 0.71 | down | COX3         |
| TC2100109 | 0.0005228 | 0.00144   | 0.71 | down | DOPEY2       |
| TC0500284 | 0.0093788 | 0.0188    | 0.71 | down | F2RL1        |
| TC2000543 | 0.0000806 | 0.000292  | 0.71 | down | FERMT1       |
| TC0400931 | 0.0003648 | 0.00105   | 0.71 | down | FRYL         |
| TC2100220 | 0.0002678 | 0.000807  | 0.71 | down | HSPA13       |
| TC1501237 | 0.0000579 | 0.000225  | 0.71 | down | IDH2         |
| TC2100089 | 0.0000292 | 0.000133  | 0.71 | down | ITSN1        |
| TC1500395 | 0.0006343 | 0.00171   | 0.71 | down | LACTB        |
| TC1300215 | 0.0010273 | 0.0026    | 0.71 | down | NDFIP2       |
| TC0102557 | 0.0063033 | 0.0132    | 0.71 | down | PHTF1        |
| TC0X00492 | 0.0029906 | 0.0067    | 0.71 | down | Q9P1I9_HUMAN |
| TC1501011 | 0.000045  | 0.000185  | 0.71 | down | RORA         |
| TC0800169 | 0.0000135 | 0.0000704 | 0.71 | down | SCARA3       |
| TC0301086 | 0.0000105 | 0.0000577 | 0.71 | down | SUSD5        |
| TC0300707 | 0.0013688 | 0.00335   | 0.71 | down | TSC22D2      |
| TC1700587 | 0.0000492 | 0.000197  | 0.71 | down | XYLT2        |
| TC0801191 | 0.000159  | 0.000522  | 0.7  | down | ANGPT1       |
| TC1300028 | 0.0002892 | 0.000861  | 0.7  | down | C1QTNF9B-AS1 |
| TC0X00227 | 0.0006803 | 0.00181   | 0.7  | down | CLCN5        |
| TC0300014 | 0.000474  | 0.00132   | 0.7  | down | EDEM1        |
| TC0800401 | 0.0075402 | 0.0154    | 0.7  | down | FABP5        |
| TC0900226 | 0.0000353 | 0.000154  | 0.7  | down | FAM27A       |
| TC0300896 | 0.0003274 | 0.000959  | 0.7  | down | IL1RAP       |
| TC0201721 | 0.0000392 | 0.000167  | 0.7  | down | LOC654342    |
| TC1000679 | 0.0040547 | 0.00881   | 0.7  | down | LOC728158    |
| TC0600340 | 0.0000356 | 0.000155  | 0.7  | down | MAPK13       |
| TC1600245 | 0.0001058 | 0.000366  | 0.7  | down | METTL9       |
| TC0102357 | 0.0001627 | 0.000531  | 0.7  | down | NEGR1        |
| TC1001060 | 0.0000913 | 0.000322  | 0.7  | down | P4HA1        |
| TC0400671 | 0.0000209 | 0.000101  | 0.7  | down | PALLD        |
| TC0200864 | 0.0000947 | 0.000332  | 0.7  | down | PDK1         |
| TC0Y00024 | 0.0004689 | 0.00131   | 0.7  | down | PRKY         |
| TC1000891 | 0.0140422 | 0.027     | 0.7  | down | Q5SYT8_HUMAN |
| TC1400105 | 0.0421516 | 0.0712    | 0.7  | down | Q6ZVK3_HUMAN |
| TC2100323 | 0.0000656 | 0.000247  | 0.7  | down | RCAN1        |
| TC0900364 | 0.0000508 | 0.000203  | 0.7  | down | S1PR3        |
| TC0301744 | 0.0001932 | 0.000612  | 0.7  | down | SLC7A14      |

|           |           |           |      |      |            |
|-----------|-----------|-----------|------|------|------------|
| TC1300402 | 0.0000288 | 0.000132  | 0.7  | down | SMAD9      |
| TC0300631 | 0.0007923 | 0.00207   | 0.7  | down | TMEM108    |
| TC0401377 | 0.0000643 | 0.000243  | 0.7  | down | TRIM61     |
| TC0900485 | 0.0001273 | 0.000432  | 0.7  | down | UGCG       |
| TC1701121 | 0.0008087 | 0.00211   | 0.7  | down | ULK2       |
| TC0501025 | 0.0008688 | 0.00225   | 0.69 | down | ADAMTS6    |
| TC0500905 | 0.0000155 | 0.0000782 | 0.69 | down | C1QTNF3    |
| TC0801132 | 0.0022931 | 0.00529   | 0.69 | down | C8orf37    |
| TC0500690 | 0.0000097 | 0.0000548 | 0.69 | down | CCDC99     |
| TC0100720 | 0.0000414 | 0.000174  | 0.69 | down | EPHX4      |
| TC0101361 | 0.0000606 | 0.000233  | 0.69 | down | HMCN1      |
| TC1600930 | 0.0000829 | 0.000298  | 0.69 | down | IGSF6      |
| TC1600439 | 0.0012984 | 0.0032    | 0.69 | down | IRX5       |
| TC1001297 | 0.0007098 | 0.00188   | 0.69 | down | KIAA1598   |
| TC0200531 | 0.0000579 | 0.000225  | 0.69 | down | MAP4K4     |
| TC1400089 | 0.0000085 | 0.0000497 | 0.69 | down | MMP14      |
| TC1700621 | 0.0000387 | 0.000166  | 0.69 | down | MSI2       |
| TC0100760 | 0.0005039 | 0.00139   | 0.69 | down | PALMD      |
| TC0100893 | 0.0000072 | 0.0000442 | 0.69 | down | PHGDH      |
| TC0X01025 | 0.0002202 | 0.000682  | 0.69 | down | PHKA1P1    |
| TC0800777 | 0.0001633 | 0.000532  | 0.69 | down | PSD3       |
| TC0601453 | 0.0006388 | 0.00172   | 0.69 | down | RRAGD      |
| TC1600003 | 0.0000616 | 0.000236  | 0.69 | down | SNRNP25    |
| TC0400884 | 0.0053804 | 0.0114    | 0.69 | down | TLR6       |
| TC0801235 | 0.0017356 | 0.00413   | 0.69 | down | TMEM65     |
| TC0801204 | 0.0000614 | 0.000235  | 0.69 | down | TRPS1      |
| TC0X00955 | 0.0000655 | 0.000247  | 0.69 | down | WNK3       |
| TC2100128 | 0.0000405 | 0.00017   | 0.69 | down | WRB        |
| TC1700589 | 0.0000655 | 0.000247  | 0.68 | down | ACSF2      |
| TC0401025 | 0.0000829 | 0.000298  | 0.68 | down | ADAMTS3    |
| TC0700841 | 0.0000234 | 0.000111  | 0.68 | down | ARHGEF5    |
| TC2000834 | 0.0000909 | 0.000321  | 0.68 | down | ATP9A      |
| TC1100264 | 0.0000038 | 0.0000283 | 0.68 | down | C11orf41   |
| TC2100363 | 0.0000065 | 0.0000414 | 0.68 | down | C2CD2      |
| TC1800250 | 0.0007334 | 0.00193   | 0.68 | down | CCDC102B   |
| TC1100299 | 0.0000043 | 0.0000308 | 0.68 | down | CD82       |
| TC1101950 | 0.0000541 | 0.000212  | 0.68 | down | CDON       |
| TC0103405 | 0.0000676 | 0.000252  | 0.68 | down | CHML       |
| TC0401470 | 0.000047  | 0.000191  | 0.68 | down | FAT1       |
| TC0300334 | 0.0000696 | 0.000258  | 0.68 | down | FLNB       |
| TC1000777 | 0.0000739 | 0.000272  | 0.68 | down | FRMD4A     |
| TC0601160 | 0.0004668 | 0.00131   | 0.68 | down | HB25_HUMAN |
| TC1001018 | 0.0006462 | 0.00173   | 0.68 | down | HERC4      |
| TC0601655 | 0.0002465 | 0.000751  | 0.68 | down | HIVEP2     |

|           |           |           |      |      |              |
|-----------|-----------|-----------|------|------|--------------|
| TC0200745 | 0.0003501 | 0.00101   | 0.68 | down | HNMT         |
| TC1701480 | 0.0023016 | 0.0053    | 0.68 | down | HOXB4        |
| TC0200570 | 0.0000619 | 0.000236  | 0.68 | down | LIMS3        |
| TC0601359 | 0.0416532 | 0.0705    | 0.68 | down | LOC727945    |
| TC1201526 | 0.0000452 | 0.000185  | 0.68 | down | NUAK1        |
| TC0600499 | 0.0001623 | 0.00053   | 0.68 | down | OGFRL1       |
| TC0301181 | 0.0000042 | 0.0000304 | 0.68 | down | PFKFB4       |
| TC1100325 | 0.000334  | 0.000974  | 0.68 | down | PTPRJ        |
| TC0800049 | 0.0000952 | 0.000333  | 0.68 | down | Q9HBS9_HUMAN |
| TC1001169 | 0.0015648 | 0.00377   | 0.68 | down | RBP4         |
| TC0600428 | 0.0000097 | 0.0000548 | 0.68 | down | RUNX2        |
| TC1300354 | 0.0021192 | 0.00493   | 0.68 | down | SHISA2       |
| TC0X00881 | 0.0000341 | 0.00015   | 0.68 | down | SLC9A7       |
| TC2000075 | 0.000045  | 0.000185  | 0.68 | down | SNAP25       |
| TC0301697 | 0.0002829 | 0.000845  | 0.68 | down | VEPH1        |
| TC0201150 | 0.0000974 | 0.000339  | 0.68 | down | WDR69        |
| TC1900488 | 0.0000613 | 0.000235  | 0.68 | down | ZNF793       |
| TC1200702 | 0.0000182 | 0.0000894 | 0.67 | down | ALDH2        |
| TC0500858 | 0.0000319 | 0.000142  | 0.67 | down | ANKH         |
| TC0201582 | 0.0041786 | 0.00906   | 0.67 | down | C1D          |
| TC2100262 | 0.0001964 | 0.00062   | 0.67 | down | CCT8         |
| TC0201437 | 0.0000066 | 0.0000417 | 0.67 | down | CDC42EP3     |
| TC0601648 | 0.0000067 | 0.000042  | 0.67 | down | CITED2       |
| TC0300551 | 0.000443  | 0.00125   | 0.67 | down | FAM162A      |
| TC0901090 | 0.0000137 | 0.000071  | 0.67 | down | GOLM1        |
| TC1300121 | 0.0005778 | 0.00156   | 0.67 | down | GTF2F2       |
| TC1201652 | 0.0009695 | 0.00247   | 0.67 | down | HCAR1        |
| TC0200885 | 0.0000352 | 0.000154  | 0.67 | down | HOXD4        |
| TC0101685 | 0.0009274 | 0.00238   | 0.67 | down | KIF26B       |
| TC1400193 | 0.0001141 | 0.000391  | 0.67 | down | LRFN5        |
| TC1101672 | 0.000891  | 0.0023    | 0.67 | down | MAP6         |
| TC0301258 | 0.0000065 | 0.0000414 | 0.67 | down | NT5DC2       |
| TC0800928 | 0.0011734 | 0.00293   | 0.67 | down | PCMTD1       |
| TC1800446 | 0.0035708 | 0.00782   | 0.67 | down | PIAS2        |
| TC0700132 | 0.0059543 | 0.0125    | 0.67 | down | Q96MZ3_HUMAN |
| TC1001222 | 0.001299  | 0.0032    | 0.67 | down | Q9H354_HUMAN |
| TC0100916 | 0.0017448 | 0.00414   | 0.67 | down | SCAF11       |
| TC1201522 | 0.0001394 | 0.000467  | 0.67 | down | SLC41A2      |
| TC2100019 | 0.000294  | 0.000873  | 0.67 | down | USP25        |
| TC0400202 | 0.0001452 | 0.000483  | 0.66 | down | ATP10D       |
| TC1100790 | 0.0000993 | 0.000345  | 0.66 | down | C11orf70     |
| TC0401449 | 0.0000284 | 0.00013   | 0.66 | down | CASP3        |
| TC0Y00162 | 0.0017432 | 0.00414   | 0.66 | down | CD24         |
| TC0201025 | 0.0032139 | 0.00713   | 0.66 | down | CYP20A1      |

|           |           |           |      |      |           |
|-----------|-----------|-----------|------|------|-----------|
| TC1200881 | 0.0000519 | 0.000206  | 0.66 | down | EFCAB4B   |
| TC0500308 | 0.0003659 | 0.00105   | 0.66 | down | FAM151B   |
| TC0X00089 | 0.000517  | 0.00142   | 0.66 | down | FAM3C     |
| TC1100766 | 0.0000183 | 0.0000897 | 0.66 | down | FUT4      |
| TC1101722 | 0.0000217 | 0.000104  | 0.66 | down | FZD4      |
| TC2100046 | 0.0013501 | 0.00331   | 0.66 | down | GABPA     |
| TC1300297 | 0.0000085 | 0.0000497 | 0.66 | down | GAS6      |
| TC0200656 | 0.0000025 | 0.0000212 | 0.66 | down | GYPC      |
| TC0601169 | 0.0003024 | 0.000895  | 0.66 | down | HLA-DOA   |
| TC0200908 | 0.0001568 | 0.000516  | 0.66 | down | ITGA4     |
| TC1300547 | 0.0008694 | 0.00225   | 0.66 | down | KLF12     |
| TC1300341 | 0.0019278 | 0.00452   | 0.66 | down | MIPEP     |
| TC0301382 | 0.0009634 | 0.00246   | 0.66 | down | PROS1     |
| TC2100346 | 0.0001668 | 0.00054   | 0.66 | down | PSMG1     |
| TC0100338 | 0.0000451 | 0.000185  | 0.66 | down | PTPRU     |
| TC2100167 | 0.000009  | 0.0000516 | 0.66 | down | PWP2      |
| TC0701212 | 0.0000825 | 0.000298  | 0.66 | down | SEC61G    |
| TC0500951 | 0.0012858 | 0.00317   | 0.66 | down | SEPP1     |
| TC2000082 | 0.0000944 | 0.000332  | 0.66 | down | SPTLC3    |
| TC0900077 | 0.0000149 | 0.0000759 | 0.65 | down | ADAMTSL1  |
| TC0700470 | 0.0010202 | 0.00259   | 0.65 | down | AKAP9     |
| TC1700548 | 0.0000512 | 0.000204  | 0.65 | down | C17orf57  |
| TC1000052 | 0.0000041 | 0.0000298 | 0.65 | down | CELF2     |
| TC1800137 | 0.0000464 | 0.000189  | 0.65 | down | DTNA      |
| TC0901346 | 0.0000024 | 0.0000204 | 0.65 | down | ENG       |
| TC1800313 | 0.0000348 | 0.000153  | 0.65 | down | EPB41L3   |
| TC0701202 | 0.000008  | 0.0000475 | 0.65 | down | GRB10     |
| TC2100332 | 0.0000609 | 0.000234  | 0.65 | down | HLCS      |
| TC1500643 | 0.0095094 | 0.0191    | 0.65 | down | HMGNI1P38 |
| TC2100086 | 0.0003941 | 0.00112   | 0.65 | down | IFNAR1    |
| TC0201297 | 0.0005036 | 0.00139   | 0.65 | down | MBOAT2    |
| TC1100864 | 0.0000068 | 0.0000425 | 0.65 | down | NNMT      |
| TC0301787 | 0.0000673 | 0.000252  | 0.65 | down | PEX5L     |
| TC1701803 | 0.0000532 | 0.00021   | 0.65 | down | SECTM1    |
| TC0401154 | 0.000139  | 0.000466  | 0.65 | down | SLC39A8   |
| TC1100953 | 0.0001878 | 0.000598  | 0.65 | down | VWA5A     |
| TC0600181 | 0.0001621 | 0.00053   | 0.65 | down | ZNF391    |
| TC1900914 | 0.0010211 | 0.00259   | 0.65 | down | ZNF470    |
| TC1001154 | 0.0000232 | 0.00011   | 0.64 | down | ANKRD1    |
| TC0400368 | 0.0000191 | 0.000093  | 0.64 | down | ARHGAP24  |
| TC0201171 | 0.0000034 | 0.0000265 | 0.64 | down | ARMC9     |
| TC0900793 | 0.0001351 | 0.000455  | 0.64 | down | BNC2      |
| TC0101291 | 0.00068   | 0.00181   | 0.64 | down | C1orf9    |
| TC2100379 | 0.0000032 | 0.0000253 | 0.64 | down | CBS       |

|           |           |           |      |      |            |
|-----------|-----------|-----------|------|------|------------|
| TC1000694 | 0.0000356 | 0.000155  | 0.64 | down | DPYSL4     |
| TC0501456 | 0.0000146 | 0.0000748 | 0.64 | down | EBF1       |
| TC0501157 | 0.0000882 | 0.000313  | 0.64 | down | ELL2       |
| TC0700695 | 0.0000748 | 0.000275  | 0.64 | down | FAM40B     |
| TC1200151 | 0.000068  | 0.000253  | 0.64 | down | GPRC5A     |
| TC1501058 | 0.0000247 | 0.000117  | 0.64 | down | LCTL       |
| TC0100980 | 0.0001599 | 0.000525  | 0.64 | down | LOC654342  |
| TC1101778 | 0.0000056 | 0.000037  | 0.64 | down | MMP13      |
| TC2100205 | 0.000003  | 0.0000242 | 0.64 | down | PRMT2      |
| TC0900314 | 0.0000394 | 0.000167  | 0.64 | down | PSAT1      |
| TC1100589 | 0.0000035 | 0.0000268 | 0.64 | down | RHOD       |
| TC0200020 | 0.0000021 | 0.0000188 | 0.64 | down | RNF144A    |
| TC0500604 | 0.0000166 | 0.000083  | 0.64 | down | SLC26A2    |
| TC0300203 | 0.0000144 | 0.0000742 | 0.64 | down | SNRK       |
| TC0X00453 | 0.0000602 | 0.000232  | 0.64 | down | TCEAL7     |
| TC0900430 | 0.000031  | 0.00014   | 0.64 | down | TGFBR1     |
| TC0600648 | 0.0000022 | 0.0000192 | 0.64 | down | WISP3      |
| TC0700240 | 0.0000112 | 0.0000604 | 0.63 | down | ABCA13     |
| TC0500999 | 0.0000023 | 0.0000199 | 0.63 | down | ACTBL2     |
| TC0900080 | 0.0000827 | 0.000298  | 0.63 | down | ADAMTSL1   |
| TC2100188 | 0.0000021 | 0.0000188 | 0.63 | down | ADARB1     |
| TC0501233 | 0.000071  | 0.000263  | 0.63 | down | DTWD2      |
| TC0901075 | 0.0000077 | 0.0000463 | 0.63 | down | FRMD3      |
| TC0300089 | 0.0000023 | 0.0000199 | 0.63 | down | GALNTL2    |
| TC0102708 | 0.0009856 | 0.00251   | 0.63 | down | HIST3H2BB  |
| TC0601107 | 0.0000035 | 0.0000268 | 0.63 | down | IER3       |
| TC0101349 | 0.0000042 | 0.0000304 | 0.63 | down | LAMC2      |
| TC0102627 | 0.0000134 | 0.0000701 | 0.63 | down | LOC728920  |
| TC0301908 | 0.0000058 | 0.0000378 | 0.63 | down | MFI2       |
| TC1101874 | 0.0001065 | 0.000367  | 0.63 | down | MPZL3      |
| TC0700940 | 0.000018  | 0.0000888 | 0.63 | down | PDGFA      |
| TC0X00093 | 0.0010632 | 0.00268   | 0.63 | down | SAT1       |
| TC0501182 | 0.0000107 | 0.0000585 | 0.63 | down | ST8SIA4    |
| TC0202182 | 0.0000136 | 0.0000706 | 0.63 | down | STAT4      |
| TC0101487 | 0.0000123 | 0.0000657 | 0.63 | down | SYT14      |
| TC2000729 | 0.0000016 | 0.0000155 | 0.63 | down | TGM2       |
| TC0301650 | 0.000006  | 0.0000387 | 0.63 | down | TM4SF18    |
| TC0102492 | 0.0002076 | 0.000649  | 0.62 | down | COL11A1    |
| TC0501065 | 0.0000014 | 0.0000143 | 0.62 | down | ENC1       |
| TC1800141 | 0.000687  | 0.00183   | 0.62 | down | GALNT1     |
| TC0400851 | 0.0001416 | 0.000473  | 0.62 | down | GPR125     |
| TC1700648 | 0.0007399 | 0.00194   | 0.62 | down | hsa-mir-21 |
| TC1501260 | 0.0019993 | 0.00467   | 0.62 | down | LOC644192  |
| TC2100259 | 0.0005699 | 0.00155   | 0.62 | down | LTN1       |

|           |           |           |      |      |              |
|-----------|-----------|-----------|------|------|--------------|
| TC1601292 | 0.0004788 | 0.00133   | 0.62 | down | MPHOSPH6     |
| TC0X00569 | 0.0000666 | 0.00025   | 0.62 | down | MST4         |
| TC0700126 | 0.0016069 | 0.00386   | 0.62 | down | NFE2L3       |
| TC1300036 | 0.0013782 | 0.00337   | 0.62 | down | O43649_HUMAN |
| TC0100628 | 0.0000067 | 0.000042  | 0.62 | down | PDE4B        |
| TC1200215 | 0.0000332 | 0.000147  | 0.62 | down | PPFIBP1      |
| TC1400281 | 0.0000127 | 0.0000675 | 0.62 | down | PRKCH        |
| TC1601030 | 0.0023647 | 0.00542   | 0.62 | down | Q6XYE6_HUMAN |
| TC0400143 | 0.0000827 | 0.000298  | 0.62 | down | RBPJ         |
| TC1001004 | 0.0000471 | 0.000191  | 0.62 | down | RHOBTB1      |
| TC0701378 | 0.0001753 | 0.000562  | 0.62 | down | SEMA3C       |
| TC0400636 | 0.000042  | 0.000176  | 0.62 | down | TMEM144      |
| TC1800384 | 0.0006919 | 0.00184   | 0.62 | down | ZNF521       |
| TC0300393 | 0.0000043 | 0.0000308 | 0.61 | down | CADM2        |
| TC0201149 | 0.0002818 | 0.000842  | 0.61 | down | CCL20        |
| TC1101330 | 0.0000225 | 0.000107  | 0.61 | down | CHST1        |
| TC0200220 | 0.0000948 | 0.000332  | 0.61 | down | CRIP1        |
| TC0800979 | 0.0000019 | 0.0000175 | 0.61 | down | CYP7B1       |
| TC0800382 | 0.0003349 | 0.000976  | 0.61 | down | LY96         |
| TC0401339 | 0.0015889 | 0.00382   | 0.61 | down | MAP9         |
| TC2000438 | 0.0000082 | 0.0000486 | 0.61 | down | NTSR1        |
| TC0100589 | 0.0002422 | 0.000739  | 0.61 | down | PRKAA2       |
| TC0900248 | 0.0000945 | 0.000332  | 0.61 | down | Q5VV11_HUMAN |
| TC0301580 | 0.000018  | 0.0000888 | 0.61 | down | RAB6B        |
| TC0300386 | 0.0000457 | 0.000187  | 0.61 | down | ROBO2        |
| TC0900295 | 0.0000059 | 0.0000382 | 0.61 | down | RORB         |
| TC0Y00103 | 0.0001655 | 0.000537  | 0.61 | down | SPRY3        |
| TC0Y00160 | 0.001922  | 0.00451   | 0.61 | down | TTY14        |
| TC0101954 | 0.0000036 | 0.0000273 | 0.6  | down | CAMK2N1      |
| TC1400637 | 0.0000844 | 0.000302  | 0.6  | down | CRIP2        |
| TC0700821 | 0.0085439 | 0.0173    | 0.6  | down | CTAGE15P     |
| TC0401035 | 0.0000173 | 0.0000858 | 0.6  | down | CXCL5        |
| TC0301396 | 0.0000505 | 0.000202  | 0.6  | down | DCBLD2       |
| TC1300230 | 0.0000109 | 0.0000593 | 0.6  | down | GPC6         |
| TC0200301 | 0.0000145 | 0.0000744 | 0.6  | down | MEIS1        |
| TC1800380 | 0.0002522 | 0.000766  | 0.6  | down | OSBPL1A      |
| TC0500268 | 0.0000425 | 0.000177  | 0.6  | down | RGNEF        |
| TC1201128 | 0.0000284 | 0.00013   | 0.6  | down | SLC38A1      |
| TC1900148 | 0.0000012 | 0.0000129 | 0.59 | down | ANGPTL4      |
| TC1001003 | 0.0000128 | 0.0000677 | 0.59 | down | ANK3         |
| TC0301281 | 0.0000811 | 0.000293  | 0.59 | down | ARHGEF3      |
| TC0X01289 | 0.0000416 | 0.000174  | 0.59 | down | ARHGEF6      |
| TC0900638 | 0.0000021 | 0.0000188 | 0.59 | down | ASS1         |
| TC1800104 | 0.000007  | 0.0000435 | 0.59 | down | CABLES1      |

|           |           |            |      |      |             |
|-----------|-----------|------------|------|------|-------------|
| TC0301413 | 0.0000094 | 0.0000535  | 0.59 | down | CBLB        |
| TC0301448 | 0.0000429 | 0.000178   | 0.59 | down | CCDC80      |
| TC0100221 | 0.0006954 | 0.00185    | 0.59 | down | CDA         |
| TC0X01201 | 0.0000771 | 0.000281   | 0.59 | down | CUL4B       |
| TC0400657 | 0.0000837 | 0.0003     | 0.59 | down | FAM218A     |
| TC0800176 | 0.0000102 | 0.0000565  | 0.59 | down | FZD3        |
| TC1000160 | 0.000389  | 0.00111    | 0.59 | down | GJD4        |
| TC0300508 | 0.0002896 | 0.000862   | 0.59 | down | GRAMD1C     |
| TC0601054 | 0.0001121 | 0.000385   | 0.59 | down | HIST2H4A    |
| TC0900091 | 0.0000013 | 0.0000136  | 0.59 | down | IFNA1       |
| TC0200624 | 0.0002114 | 0.000658   | 0.59 | down | INSIG2      |
| TC1101271 | 0.0000741 | 0.000272   | 0.59 | down | LGR4        |
| TC1101681 | 0.0000031 | 0.0000246  | 0.59 | down | LRRC32      |
| TC2100194 | 0.0001647 | 0.000535   | 0.59 | down | PCBP3       |
| TC0100924 | 0.0000398 | 0.000168   | 0.59 | down | SEC22B      |
| TC1200305 | 0.0000296 | 0.000135   | 0.59 | down | SPATS2      |
| TC1700229 | 0.0000366 | 0.000158   | 0.59 | down | SPECC1      |
| TC0X00422 | 0.0003008 | 0.000891   | 0.59 | down | TMEM35      |
| TC0200906 | 0.0000029 | 0.0000237  | 0.59 | down | UBE2E3      |
| TC0300626 | 0.0000006 | 0.00000769 | 0.58 | down | ACPP        |
| TC1001343 | 0.000003  | 0.0000242  | 0.58 | down | ADAM12      |
| TC0400471 | 0.0000302 | 0.000137   | 0.58 | down | ANK2        |
| TC0601300 | 0.0000679 | 0.000253   | 0.58 | down | ENPP5       |
| TC0801022 | 0.0000015 | 0.0000148  | 0.58 | down | EYA1        |
| TC0X01348 | 0.0000068 | 0.0000425  | 0.58 | down | GABRE       |
| TC0701547 | 0.0000038 | 0.0000283  | 0.58 | down | LAMB1       |
| TC0300019 | 0.0000048 | 0.0000334  | 0.58 | down | LMCD1       |
| TC1500465 | 0.000025  | 0.000117   | 0.58 | down | NEO1        |
| TC0901235 | 0.0000085 | 0.0000497  | 0.58 | down | PTPN3       |
| TC1400850 | 0.0000199 | 0.0000966  | 0.58 | down | PYGL        |
| TC1600314 | 0.0000095 | 0.0000539  | 0.58 | down | QPRT        |
| TC2000116 | 0.0000083 | 0.000049   | 0.58 | down | RIN2        |
| TC1700730 | 0.0000411 | 0.000173   | 0.58 | down | SOX9        |
| TC0800809 | 0.0000015 | 0.0000148  | 0.58 | down | STC1        |
| TC0400146 | 0.0001928 | 0.000611   | 0.58 | down | STIM2       |
| TC0100630 | 0.0033896 | 0.00747    | 0.58 | down | TCTEX1D1    |
| TC1201141 | 0.0001241 | 0.000422   | 0.58 | down | VDR         |
| TC0100667 | 0.0000026 | 0.0000217  | 0.57 | down | AK5         |
| TC1600572 | 0.0000008 | 0.00000948 | 0.57 | down | CALB2       |
| TC1800395 | 0.000039  | 0.000166   | 0.57 | down | CDH2        |
| TC1100265 | 0.0000522 | 0.000207   | 0.57 | down | CK069_HUMAN |
| TC1800407 | 0.0000121 | 0.0000647  | 0.57 | down | FAM59A      |
| TC0600688 | 0.0000251 | 0.000118   | 0.57 | down | GJA1        |
| TC0100095 | 0.0000079 | 0.0000472  | 0.57 | down | H6PD        |



|           |           |            |      |      |              |
|-----------|-----------|------------|------|------|--------------|
| TC0701089 | 0.0000853 | 0.000304   | 0.57 | down | HOXA10       |
| TC0301845 | 0.0000149 | 0.0000759  | 0.57 | down | LEPREL1      |
| TC2100224 | 0.0000089 | 0.0000513  | 0.57 | down | NRIP1        |
| TC0701370 | 0.000127  | 0.000431   | 0.57 | down | PION         |
| TC2000815 | 0.0000014 | 0.0000143  | 0.57 | down | PREX1        |
| TC0200433 | 0.0009075 | 0.00233    | 0.57 | down | Q6ZW50_HUMAN |
| TC1800131 | 0.0000022 | 0.0000192  | 0.57 | down | RNF125       |
| TC0501249 | 0.0000191 | 0.000093   | 0.57 | down | ZNF608       |
| TC1500662 | 0.0000098 | 0.0000552  | 0.56 | down | ARRDC4       |
| TC0X00683 | 0.0000003 | 0.00000475 | 0.56 | down | BGN          |
| TC0600371 | 0.0000051 | 0.0000346  | 0.56 | down | DAAM2        |
| TC2200647 | 0.0017144 | 0.00409    | 0.56 | down | ELFN2        |
| TC0101825 | 0.0000086 | 0.00005    | 0.56 | down | ERRFI1       |
| TC0200787 | 0.0000296 | 0.000135   | 0.56 | down | FMNL2        |
| TC1700571 | 0.0000131 | 0.0000688  | 0.56 | down | IGF2BP1      |
| TC1201058 | 0.0000697 | 0.000258   | 0.56 | down | ITPR2        |
| TC1400994 | 0.0000006 | 0.00000769 | 0.56 | down | LTBP2        |
| TC0X00099 | 0.0014053 | 0.00343    | 0.56 | down | PDK3         |
| TC0300785 | 0.000089  | 0.000316   | 0.56 | down | SKIL         |
| TC0800365 | 0.0000259 | 0.000121   | 0.56 | down | SULF1        |
| TC0800801 | 0.0000011 | 0.0000121  | 0.56 | down | TNFRSF10A    |
| TC0300695 | 0.0000067 | 0.000042   | 0.55 | down | AGTR1        |
| TC1700713 | 0.0000024 | 0.0000204  | 0.55 | down | ARSG         |
| TC2100318 | 0.0000108 | 0.000059   | 0.55 | down | ATP5O        |
| TC0401047 | 0.0000346 | 0.000152   | 0.55 | down | CDKL2        |
| TC0900824 | 0.0000258 | 0.00012    | 0.55 | down | hsa-mir-31   |
| TC0501159 | 0.0000024 | 0.0000204  | 0.55 | down | PCSK1        |
| TC1800221 | 0.0000044 | 0.0000313  | 0.55 | down | PMAIP1       |
| TC0103421 | 0.0000012 | 0.0000129  | 0.55 | down | SMYD3        |
| TC1200206 | 0.0000168 | 0.0000839  | 0.55 | down | SSPN         |
| TC0200835 | 0.0000048 | 0.0000334  | 0.54 | down | CERS6        |
| TC0801134 | 0.0003407 | 0.00099    | 0.54 | down | GDF6         |
| TC0X01253 | 0.0000402 | 0.00017    | 0.54 | down | GPC4         |
| TC0601167 | 0.0000925 | 0.000326   | 0.54 | down | HLA-DMB      |
| TC0701090 | 0.000002  | 0.0000183  | 0.54 | down | HOXA11       |
| TC0700096 | 0.000003  | 0.0000242  | 0.54 | down | ITGB8        |
| TC1700723 | 0.0003876 | 0.00111    | 0.54 | down | KCNJ2        |
| TC0400555 | 0.0000275 | 0.000127   | 0.54 | down | MGST2        |
| TC0202230 | 0.0000009 | 0.0000102  | 0.54 | down | MPP4         |
| TC0202245 | 0.0000166 | 0.000083   | 0.54 | down | RAPH1        |
| TC1200216 | 0.0002778 | 0.000832   | 0.54 | down | REP15        |
| TC0700692 | 0.0000079 | 0.0000472  | 0.54 | down | SMO          |
| TC0300736 | 0.0000013 | 0.0000136  | 0.54 | down | TIPARP       |
| TC1700357 | 0.0000019 | 0.0000175  | 0.54 | down | TMEM98       |

|           |           |            |      |      |              |
|-----------|-----------|------------|------|------|--------------|
| TC1701645 | 0.0000593 | 0.00023    | 0.53 | down | ABCA8        |
| TC0400409 | 0.0000018 | 0.0000169  | 0.53 | down | BMPR1B       |
| TC1600172 | 0.0000472 | 0.000191   | 0.53 | down | CIITA        |
| TC0801219 | 0.000009  | 0.0000516  | 0.53 | down | HAS2         |
| TC0601032 | 0.0000317 | 0.000142   | 0.53 | down | HIST2H4A     |
| TC0701082 | 0.0000182 | 0.0000894  | 0.53 | down | HOXA2        |
| TC1700689 | 0.0003121 | 0.000923   | 0.53 | down | MILR1        |
| TC0301502 | 0.0000022 | 0.0000192  | 0.53 | down | MYLK         |
| TC0401225 | 0.0000014 | 0.0000143  | 0.53 | down | NDNF         |
| TC0400144 | 0.0001201 | 0.000409   | 0.53 | down | TBC1D19      |
| TC2100118 | 0.0000718 | 0.000265   | 0.53 | down | TTC3         |
| TC0200412 | 0.0000005 | 0.00000688 | 0.53 | down | VAMP8        |
| TC0800392 | 0.0000298 | 0.000135   | 0.53 | down | ZFHX4        |
| TC0301711 | 0.0000017 | 0.0000162  | 0.52 | down | B3GALNT1     |
| TC0600300 | 0.0000024 | 0.0000204  | 0.52 | down | HLA-DPB1     |
| TC0400958 | 0.0000049 | 0.0000338  | 0.52 | down | KDR          |
| TC1200359 | 0.0000007 | 0.00000852 | 0.52 | down | KRT18        |
| TC0800233 | 0.000006  | 0.0000387  | 0.52 | down | PLEKHA2      |
| TC1101412 | 0.0000005 | 0.00000688 | 0.52 | down | SLC43A3      |
| TC0301277 | 0.0000076 | 0.0000458  | 0.52 | down | WNT5A        |
| TC0600013 | 0.0000064 | 0.000041   | 0.51 | down | FOXC1        |
| TC0700914 | 0.0000048 | 0.0000334  | 0.51 | down | INSIG1       |
| TC0600087 | 0.0001412 | 0.000472   | 0.51 | down | RNF182       |
| TC0601429 | 0.0000006 | 0.00000769 | 0.51 | down | TBX18        |
| TC0601768 | 0.0000002 | 0.00000349 | 0.51 | down | THBS2        |
| TC2000864 | 0.0000011 | 0.0000121  | 0.5  | down | APCDD1L      |
| TC0201530 | 0.0000018 | 0.0000169  | 0.5  | down | EFEMP1       |
| TC1100772 | 0.0000015 | 0.0000148  | 0.5  | down | ENDOD1       |
| TC2000566 | 0.0000007 | 0.00000852 | 0.5  | down | FLRT3        |
| TC0200803 | 0.0000397 | 0.000168   | 0.5  | down | GALNT5       |
| TC1800109 | 0.0000003 | 0.00000475 | 0.5  | down | LAMA3        |
| TC1201116 | 0.0000058 | 0.0000378  | 0.5  | down | PRICKLE1     |
| TC2100421 | 0.0000806 | 0.000292   | 0.5  | down | Q9NSH7_HUMAN |
| TC1100393 | 0.0000001 | 0.00000202 | 0.5  | down | SERPING1     |
| TC0501500 | 0.0000015 | 0.0000148  | 0.5  | down | STC2         |
| TC0800800 | 0.0000001 | 0.00000202 | 0.5  | down | TNFRSF10D    |
| TC1401101 | 0.0000013 | 0.0000136  | 0.49 | down | CLMN         |
| TC0701083 | 0.0000863 | 0.000307   | 0.49 | down | HOXA3        |
| TC1200384 | 0.0000071 | 0.0000439  | 0.49 | down | HOXC6        |
| TC0400161 | 0.0000098 | 0.0000552  | 0.49 | down | PGM2         |
| TC2200343 | 0.0000013 | 0.0000136  | 0.49 | down | PNPLA3       |
| TC0102529 | 0.0000462 | 0.000189   | 0.49 | down | SLC16A4      |
| TC1700472 | 0.0000529 | 0.000209   | 0.49 | down | WNK4         |
| TC1201437 | 0.0000974 | 0.000339   | 0.48 | down | ATP2B1       |

|           |           |            |      |      |              |
|-----------|-----------|------------|------|------|--------------|
| TC0700065 | 0.0000306 | 0.000139   | 0.48 | down | MIOS         |
| TC0201948 | 0.0000004 | 0.00000586 | 0.48 | down | NCKAP5       |
| TC0400539 | 0.0000149 | 0.0000759  | 0.48 | down | PCDH10       |
| TC0301635 | 0.0000074 | 0.000045   | 0.48 | down | PLOD2        |
| TC0901056 | 0.000001  | 0.0000112  | 0.48 | down | PRUNE2       |
| TC2200645 | 0.0000004 | 0.00000586 | 0.48 | down | RAC2         |
| TC1800163 | 0.0000001 | 0.00000202 | 0.48 | down | SLC14A1      |
| TC0301058 | 0.0000006 | 0.00000769 | 0.48 | down | ZNF385D      |
| TC0601601 | 0.0000687 | 0.000255   | 0.47 | down | ARHGGEF35    |
| TC0500378 | 0.0000063 | 0.0000405  | 0.47 | down | C5orf30      |
| TC2000385 | 0.0000022 | 0.0000192  | 0.47 | down | DOK5         |
| TC0701081 | 0.0000083 | 0.000049   | 0.47 | down | HOXA1        |
| TC0701084 | 0.0000394 | 0.000167   | 0.47 | down | HOXA4        |
| TC0501311 | 0.0000005 | 0.00000688 | 0.47 | down | KLHL3        |
| TC1300044 | 0.0000026 | 0.0000217  | 0.47 | down | WASF3        |
| TC0102208 | 0.0000008 | 0.00000948 | 0.47 | down | ZSWIM5       |
| TC1800401 | 0.0000901 | 0.000319   | 0.46 | down | B4GALT6      |
| TC0301909 | 0.0000073 | 0.0000446  | 0.46 | down | DLG1         |
| TC1800098 | 0.0000048 | 0.0000334  | 0.46 | down | GATA6        |
| TC1200379 | 0.0000083 | 0.000049   | 0.46 | down | HOXC11       |
| TC0202289 | 0.0000008 | 0.0000475  | 0.46 | down | IKZF2        |
| TC1000683 | 0.0000104 | 0.0000573  | 0.46 | down | PTPRE        |
| TC1100155 | 0.0000003 | 0.00000475 | 0.46 | down | Q96C21_HUMAN |
| TC0X00475 | 0.0000005 | 0.00000688 | 0.46 | down | RNF128       |
| TC0500497 | 0.0000002 | 0.00000349 | 0.46 | down | TGFBI        |
| TC0400188 | 0.0000009 | 0.0000102  | 0.46 | down | UCHL1        |
| TC0900013 | 0.0000005 | 0.00000688 | 0.46 | down | VLDLR        |
| TC0800663 | 0.0000022 | 0.0000192  | 0.45 | down | ANGPT2       |
| TC1500650 | 0.0000051 | 0.0000346  | 0.45 | down | MCTP2        |
| TC1501002 | 0.0000003 | 0.0000242  | 0.45 | down | MYO1E        |
| TC1101731 | 0.0000001 | 0.0000001  | 0.45 | down | NOX4         |
| TC0501298 | 0.0000196 | 0.0000953  | 0.45 | down | PITX1        |
| TC0X01066 | 0.0000429 | 0.000178   | 0.45 | down | RPS6KA6      |
| TC0200015 | 0.0000185 | 0.0000905  | 0.45 | down | SOX11        |
| TC0301750 | 0.0000008 | 0.00000948 | 0.45 | down | TNIK         |
| TC0701022 | 0.0000105 | 0.0000577  | 0.44 | down | AGMO         |
| TC0900163 | 0.0000015 | 0.0000148  | 0.44 | down | CA9          |
| TC1200654 | 0.0000019 | 0.0000175  | 0.44 | down | CHST11       |
| TC0202051 | 0.0000148 | 0.0000757  | 0.44 | down | FAP          |
| TC2000697 | 0.0000005 | 0.00000688 | 0.44 | down | GDF5         |
| TC1901418 | 0.0000004 | 0.00000586 | 0.44 | down | HSPB6        |
| TC0301701 | 0.0003826 | 0.0011     | 0.44 | down | LXN          |
| TC1701766 | 0.0000001 | 0.00000202 | 0.44 | down | NPTX1        |
| TC0600929 | 0.0001373 | 0.000462   | 0.44 | down | NRN1         |

|           |           |            |      |      |              |
|-----------|-----------|------------|------|------|--------------|
| TC1100784 | 0.0000376 | 0.000162   | 0.44 | down | Q96M56_HUMAN |
| TC1100970 | 0.0000261 | 0.000122   | 0.44 | down | SLC37A2      |
| TC0400363 | 0.0000001 | 0.00000202 | 0.43 | down | AGPAT9       |
| TC0701446 | 0.0000016 | 0.0000155  | 0.43 | down | BAIAP2L1     |
| TC1901622 | 0.0000063 | 0.0000405  | 0.43 | down | CCDC8        |
| TC0800047 | 0.0000262 | 0.000122   | 0.43 | down | ERVK2        |
| TC1200240 | 0.0000008 | 0.00000948 | 0.43 | down | FGD4         |
| TC0601170 | 0.0000039 | 0.0000288  | 0.43 | down | HLA-DPA1     |
| TC0500149 | 0.000007  | 0.0000435  | 0.43 | down | LOC100129186 |
| TC0700629 | 0.0000028 | 0.000023   | 0.43 | down | MET          |
| TC0401462 | 0.0000046 | 0.0000326  | 0.43 | down | PDLIM3       |
| TC0500918 | 0.0000001 | 0.0000001  | 0.43 | down | RANBP3L      |
| TC1300027 | 0.0000001 | 0.0000001  | 0.43 | down | TNFRSF19     |
| TC1500676 | 0.0000049 | 0.0000338  | 0.42 | down | ALDH1A3      |
| TC0800489 | 0.0000001 | 0.00000202 | 0.42 | down | CTHRC1       |
| TC0800903 | 0.0000002 | 0.00000349 | 0.42 | down | PLAT         |
| TC0X00424 | 0.0000018 | 0.0000169  | 0.41 | down | DRP2         |
| TC1800127 | 0.0000465 | 0.000189   | 0.41 | down | DSG2         |
| TC0400582 | 0.0000012 | 0.0000129  | 0.41 | down | EDNRA        |
| TC1900320 | 0.0000009 | 0.0000102  | 0.41 | down | GDF15        |
| TC0400935 | 0.0000009 | 0.0000102  | 0.41 | down | OCIAD2       |
| TC0601746 | 0.0000001 | 0.00000202 | 0.41 | down | PDE10A       |
| TC1300551 | 0.0000007 | 0.00000852 | 0.41 | down | TBC1D4       |
| TC0501451 | 0.0000002 | 0.00000349 | 0.4  | down | ADAM19       |
| TC0400663 | 0.0000012 | 0.0000129  | 0.4  | down | CPE          |
| TC0301735 | 0.0000007 | 0.00000852 | 0.4  | down | MECOM        |
| TC1401136 | 0.0000007 | 0.00000852 | 0.4  | down | MOK          |
| TC0900020 | 0.0000013 | 0.0000136  | 0.4  | down | SLC1A1       |
| TC0300436 | 0.0000031 | 0.0000246  | 0.4  | down | ST3GAL6      |
| TC0900826 | 0.0000001 | 0.0000001  | 0.39 | down | CDKN2B       |
| TC1701716 | 0.0000002 | 0.00000349 | 0.39 | down | CYGB         |
| TC0601168 | 0.0000001 | 0.00000202 | 0.39 | down | HLA-DMA      |
| TC1701478 | 0.0000014 | 0.0000143  | 0.39 | down | HOXB2        |
| TC0901057 | 0.0000057 | 0.0000373  | 0.39 | down | PRUNE2       |
| TC0300690 | 0.001225  | 0.00304    | 0.39 | down | Q9P1D0_HUMAN |
| TC0500125 | 0.0000004 | 0.00000586 | 0.39 | down | SLC1A3       |
| TC1100785 | 0.0014723 | 0.00358    | 0.39 | down | TMEM133      |
| TC0101871 | 0.0000001 | 0.00000202 | 0.38 | down | DHRS3        |
| TC0400876 | 0.0001421 | 0.000475   | 0.38 | down | GAFA3        |
| TC0500147 | 0.0000035 | 0.0000268  | 0.38 | down | GHR          |
| TC1500656 | 0.0000001 | 0.00000202 | 0.38 | down | NR2F2        |
| TC1601328 | 0.0000001 | 0.00000202 | 0.38 | down | SLC7A5       |
| TC1201381 | 0.0000018 | 0.0000169  | 0.37 | down | CPM          |
| TC0500355 | 0.0000037 | 0.0000278  | 0.37 | down | ERAP2        |

|           |           |            |      |      |              |
|-----------|-----------|------------|------|------|--------------|
| TC0500187 | 0.0000015 | 0.0000148  | 0.37 | down | IL31RA       |
| TC0300011 | 0.0000028 | 0.000023   | 0.37 | down | ITPR1        |
| TC0701645 | 0.0000013 | 0.0000136  | 0.37 | down | PLXNA4       |
| TC2100382 | 0.0000041 | 0.0000298  | 0.37 | down | SIK1         |
| TC0700585 | 0.0000007 | 0.00000852 | 0.36 | down | LRRC17       |
| TC0800393 | 0.0000099 | 0.0000555  | 0.36 | down | PKIA         |
| TC0100875 | 0.0000014 | 0.0000143  | 0.36 | down | PTGFRN       |
| TC1000292 | 0.0000002 | 0.00000349 | 0.36 | down | TET1         |
| TC0401281 | 0.0000024 | 0.0000204  | 0.35 | down | CLGN         |
| TC0100738 | 0.0000002 | 0.00000349 | 0.35 | down | FNBP1L       |
| TC0700622 | 0.0000001 | 0.00000202 | 0.35 | down | FOXP2        |
| TC0601159 | 0.0000005 | 0.0000341  | 0.35 | down | HLA-DQB1     |
| TC0500930 | 0.0000095 | 0.0000539  | 0.35 | down | LIFR         |
| TC0101234 | 0.0000001 | 0.0000001  | 0.35 | down | RGS4         |
| TC0401332 | 0.0000222 | 0.000106   | 0.35 | down | SFRP2        |
| TC0401327 | 0.0000001 | 0.0000001  | 0.34 | down | TMEM154      |
| TC2100252 | 0.0000001 | 0.0000001  | 0.33 | down | ADAMTS1      |
| TC0600722 | 0.0000007 | 0.00000852 | 0.33 | down | ENPP1        |
| TC2000221 | 0.0000001 | 0.0000001  | 0.33 | down | GDF5OS       |
| TC0201216 | 0.0000001 | 0.0000001  | 0.33 | down | MLPH         |
| TC0101521 | 0.0000001 | 0.00000202 | 0.33 | down | TGFB2        |
| TC0Y00071 | 0.0000006 | 0.00000769 | 0.32 | down | EIF1AY       |
| TC1100241 | 0.0000014 | 0.0000143  | 0.32 | down | FIBIN        |
| TC1600623 | 0.0000598 | 0.000231   | 0.32 | down | HSD17B2      |
| TC1601110 | 0.0000004 | 0.00000586 | 0.32 | down | IRX3         |
| TC1701357 | 0.0000006 | 0.00000769 | 0.32 | down | KRT19        |
| TC0601537 | 0.0000002 | 0.00000349 | 0.32 | down | LAMA4        |
| TC1500733 | 0.0000002 | 0.00000349 | 0.32 | down | NDN          |
| TC0900198 | 0.0000002 | 0.00000349 | 0.32 | down | Q4VXF0_HUMAN |
| TC2100293 | 0.0000001 | 0.0000001  | 0.32 | down | TIAM1        |
| TC1700158 | 0.0000001 | 0.0000001  | 0.32 | down | TRPV2        |
| TC0700087 | 0.0000001 | 0.0000001  | 0.32 | down | TSPAN13      |
| TC0Y00165 | 0.0000007 | 0.00000852 | 0.31 | down | KDM5D        |
| TC0400166 | 0.0000021 | 0.0000188  | 0.31 | down | KLHL5        |
| TC1800208 | 0.0000003 | 0.00000475 | 0.31 | down | NEDD4L       |
| TC1201020 | 0.0000003 | 0.00000475 | 0.3  | down | ARHGDI3      |
| TC0200207 | 0.0000005 | 0.00000688 | 0.3  | down | PLEKHH2      |
| TC1501100 | 0.0000001 | 0.0000001  | 0.3  | down | SEMA7A       |
| TC0501310 | 0.0000001 | 0.0000001  | 0.3  | down | SPOCK1       |
| TC0800389 | 0.0000001 | 0.0000001  | 0.29 | down | CRISPLD1     |
| TC0200883 | 0.0000003 | 0.00000475 | 0.29 | down | HOXD8        |
| TC0202040 | 0.0000019 | 0.0000175  | 0.29 | down | PLA2R1       |
| TC1000637 | 0.0000001 | 0.0000001  | 0.29 | down | PPAPDC1A     |
| TC0Y00070 | 0.0000001 | 0.0000001  | 0.29 | down | TXLNG2P      |

|           |           |            |      |      |              |
|-----------|-----------|------------|------|------|--------------|
| TC0701088 | 0.0000001 | 0.00000202 | 0.28 | down | HOXA9        |
| TC0401291 | 0.0000001 | 0.00000202 | 0.28 | down | INPP4B       |
| TC1700547 | 0.0000001 | 0.0000001  | 0.28 | down | ITGB3        |
| TC0400151 | 0.0000001 | 0.0000001  | 0.28 | down | PCDH7        |
| TC0102558 | 0.0000001 | 0.0000001  | 0.28 | down | PTPN22       |
| TC0501563 | 0.0000006 | 0.00000769 | 0.27 | down | GFPT2        |
| TC0500902 | 0.0000001 | 0.0000001  | 0.26 | down | ADAMTS12     |
| TC0500969 | 0.0000002 | 0.00000349 | 0.26 | down | EMB          |
| TC1200382 | 0.0000002 | 0.00000349 | 0.26 | down | HOXC9        |
| TC0701079 | 0.0000011 | 0.0000121  | 0.25 | down | SKAP2        |
| TC2100253 | 0.0000001 | 0.00000202 | 0.24 | down | ADAMTS5      |
| TC0201781 | 0.0000001 | 0.0000001  | 0.24 | down | AFF3         |
| TC1500431 | 0.0000001 | 0.0000001  | 0.24 | down | CORO2B       |
| TC1200882 | 0.0000044 | 0.0000313  | 0.24 | down | LOC100128816 |
| TC0900822 | 0.0000001 | 0.00000202 | 0.24 | down | MIR31HG      |
| TC0900924 | 0.0000001 | 0.00000202 | 0.23 | down | CNTNAP3      |
| TC0102380 | 0.0000002 | 0.00000349 | 0.23 | down | ELTD1        |
| TC0202064 | 0.0000001 | 0.0000001  | 0.23 | down | GALNT3       |
| TC0601156 | 0.0000005 | 0.00000688 | 0.23 | down | HLA-DRB5     |
| TC1300447 | 0.0000007 | 0.00000852 | 0.23 | down | KCTD4        |
| TC1000098 | 0.0000001 | 0.0000001  | 0.23 | down | PLXDC2       |
| TC1800238 | 0.0000006 | 0.00000769 | 0.23 | down | SERPINB7     |
| TC1400328 | 0.0000001 | 0.0000001  | 0.23 | down | SMOC1        |
| TC0401016 | 0.0000001 | 0.0000001  | 0.23 | down | SULT1B1      |
| TC0202185 | 0.0000001 | 0.0000001  | 0.23 | down | TMEFF2       |
| TC0401359 | 0.0000001 | 0.0000001  | 0.22 | down | FAM198B      |
| TC1200383 | 0.0000002 | 0.00000349 | 0.22 | down | HOXC8        |
| TC0Y00056 | 0.0000001 | 0.0000001  | 0.22 | down | NLGN4Y       |
| TC1201423 | 0.0000001 | 0.0000001  | 0.22 | down | SLC6A15      |
| TC0301144 | 0.0000001 | 0.0000001  | 0.21 | down | CDCP1        |
| TC0X00397 | 0.0000001 | 0.0000001  | 0.21 | down | KLHL4        |
| TC0202126 | 0.0000072 | 0.0000442  | 0.21 | down | LOC375295    |
| TC1601077 | 0.0000001 | 0.00000202 | 0.21 | down | NETO2        |
| TC0Y00012 | 0.0000001 | 0.0000001  | 0.2  | down | ZFY          |
| TC1800188 | 0.0000001 | 0.00000202 | 0.19 | down | DCC          |
| TC0300182 | 0.0000001 | 0.00000202 | 0.19 | down | ENTPD3       |
| TC1300644 | 0.0000002 | 0.00000349 | 0.19 | down | FAM155A      |
| TC0500623 | 0.0000001 | 0.0000001  | 0.19 | down | GRIA1        |
| TC0801100 | 0.0000003 | 0.00000475 | 0.19 | down | MMP16        |
| TC0801101 | 0.0000001 | 0.0000001  | 0.19 | down | MMP16        |
| TC2100092 | 0.0000001 | 0.0000001  | 0.19 | down | MRPS6        |
| TC1200525 | 0.0000001 | 0.0000001  | 0.19 | down | TRHDE        |
| TC0Y00143 | 0.0000001 | 0.0000001  | 0.19 | down | UTY          |
| TC0100770 | 0.0000001 | 0.0000001  | 0.19 | down | VCAM1        |

|           |           |            |       |      |              |
|-----------|-----------|------------|-------|------|--------------|
| TC0202049 | 0.0000001 | 0.0000001  | 0.18  | down | DPP4         |
| TC0800838 | 0.0000001 | 0.0000001  | 0.18  | down | DUSP4        |
| TC2100124 | 0.0000001 | 0.0000001  | 0.18  | down | KCNJ15       |
| TC0701023 | 0.0000001 | 0.00000202 | 0.18  | down | MEOX2        |
| TC0Y00011 | 0.0000001 | 0.0000001  | 0.18  | down | RPS4Y1       |
| TC0900218 | 0.0000001 | 0.0000001  | 0.17  | down | CNTNAP3B     |
| TC0701087 | 0.0000005 | 0.00000688 | 0.17  | down | HOXA7        |
| TC1501066 | 0.0000001 | 0.0000001  | 0.17  | down | ITGA11       |
| TC0900510 | 0.0000001 | 0.0000001  | 0.17  | down | PAPPA        |
| TC1800193 | 0.0000002 | 0.00000349 | 0.17  | down | RAB27B       |
| TC0501153 | 0.0000001 | 0.0000001  | 0.16  | down | MCTP1        |
| TC0102459 | 0.0000001 | 0.00000202 | 0.15  | down | ARHGAP29     |
| TC0500956 | 0.0000001 | 0.0000001  | 0.15  | down | CCL28        |
| TC0501408 | 0.0000001 | 0.00000202 | 0.15  | down | CD74         |
| TC0400570 | 0.0000001 | 0.0000001  | 0.15  | down | HHIP         |
| TC0900518 | 0.0000001 | 0.0000001  | 0.15  | down | TLR4         |
| TC1201056 | 0.0000004 | 0.00000586 | 0.14  | down | BHLHE41      |
| TC0102199 | 0.0000003 | 0.00000475 | 0.14  | down | NR_002755.2  |
| TC0Y00051 | 0.0000001 | 0.0000001  | 0.14  | down | USP9Y        |
| TC1800488 | 0.0000001 | 0.0000001  | 0.13  | down | CCDC68       |
| TC0901284 | 0.0000001 | 0.0000001  | 0.12  | down | Q5QFB8_HUMAN |
| TC0901283 | 0.0000001 | 0.0000001  | 0.12  | down | Q5QFB9_HUMAN |
| TC1701642 | 0.0000001 | 0.0000001  | 0.12  | down | SLC16A6      |
| TC0700704 | 0.0000001 | 0.0000001  | 0.11  | down | CPA4         |
| TC0700709 | 0.0000001 | 0.0000001  | 0.11  | down | MEST         |
| TC0600327 | 0.0000001 | 0.0000001  | 0.11  | down | SCUBE3       |
| TC1200380 | 0.0000013 | 0.0000136  | 0.1   | down | HOXC10       |
| TC0900244 | 0.0000001 | 0.0000001  | 0.095 | down | LOC643792    |
| TC1300640 | 0.0000001 | 0.0000001  | 0.094 | down | EFNB2        |
| TC0400381 | 0.0000001 | 0.0000001  | 0.092 | down | SPP1         |
| TC0600293 | 0.0000001 | 0.0000001  | 0.088 | down | HLA-DRA      |
| TC0400885 | 0.0000001 | 0.0000001  | 0.084 | down | TMEM156      |
| TC0X00470 | 0.0000001 | 0.0000001  | 0.082 | down | NRK          |
| TC0Y00052 | 0.0000001 | 0.0000001  | 0.081 | down | DDX3Y        |
| TC0701086 | 0.0000021 | 0.0000188  | 0.08  | down | HOXA6        |
| TC1200030 | 0.0000001 | 0.0000001  | 0.07  | down | CCND2        |
| TC1400549 | 0.0000001 | 0.0000001  | 0.057 | down | NR_003213.1  |
| TC0400595 | 0.0000001 | 0.0000001  | 0.055 | down | MAB21L2      |
| TC0701085 | 0.0000001 | 0.0000001  | 0.053 | down | HOXA5        |
| TC0800396 | 0.0000001 | 0.0000001  | 0.052 | down | STMN2        |
| TC0102595 | 0.0000001 | 0.0000001  | 0.036 | down | TBX15        |

Supplementary table 3.sigal-net

| Gene symbol | betweenness centrality | degree | indegree | outdegree | style |
|-------------|------------------------|--------|----------|-----------|-------|
| PLCB4       | 0.002534014            | 7      | 7        | 3         | up    |
| FLNB        | 0.001559393            | 6      | 6        | 6         | down  |
| CAMK2G      | 0.001403454            | 2      | 1        | 2         | up    |
| GRIA1       | 0.001091575            | 3      | 2        | 1         | down  |
| RAC2        | 0.000935636            | 8      | 4        | 4         | down  |
| MAPK13      | 0.000935636            | 8      | 4        | 4         | down  |
| ITGA4       | 0.000929139            | 12     | 10       | 4         | down  |
| LYN         | 0.000623757            | 3      | 2        | 1         | up    |
| CCND2       | 0.000389848            | 5      | 4        | 1         | down  |
| CDC25B      | 0.000389848            | 2      | 1        | 1         | up    |
| FZD3        | 0.000363858            | 5      | 4        | 1         | down  |
| FZD4        | 0.000363858            | 5      | 4        | 1         | down  |
| FZD7        | 0.000363858            | 5      | 4        | 1         | up    |
| CDK1        | 0.000350864            | 5      | 4        | 1         | up    |
| CASP3       | 0.000233909            | 5      | 3        | 2         | down  |
| RBL1        | 0.000233909            | 2      | 2        | 1         | up    |
| PREX1       | 0.000194924            | 2      | 1        | 1         | down  |
| PLXNA2      | 0.000194924            | 2      | 1        | 2         | up    |
| ITPR1       | 0.000136447            | 3      | 3        | 1         | down  |
| ITPR2       | 0.000136447            | 3      | 3        | 1         | down  |
| TGFB2       | 0.000116955            | 3      | 2        | 1         | down  |
| HLA-DMA     | 0.000116955            | 8      | 7        | 8         | down  |
| HLA-DMB     | 0.000116955            | 8      | 7        | 8         | down  |
| RASGRF2     | 0.000116955            | 2      | 2        | 2         | up    |
| ITGA11      | 0.000110457            | 10     | 9        | 2         | down  |
| ITGB3       | 0.000110457            | 10     | 9        | 2         | down  |
| ITGB8       | 0.000110457            | 10     | 9        | 2         | down  |
| ITGA2       | 0.000110457            | 10     | 9        | 2         | up    |
| ITGA8       | 0.000110457            | 10     | 9        | 2         | up    |
| PTTG1       | 7.79697E-05            | 2      | 1        | 1         | up    |
| ARRB1       | 7.79697E-05            | 2      | 2        | 2         | up    |
| CACNA1C     | 7.79697E-05            | 2      | 2        | 1         | up    |
| ESPL1       | 7.79697E-05            | 2      | 1        | 1         | up    |
| NOTCH3      | 7.79697E-05            | 3      | 2        | 1         | up    |
| LTBP1       | 7.79697E-05            | 2      | 1        | 1         | up    |
| CDKN2B      | 5.84773E-05            | 2      | 1        | 1         | down  |
| STAT4       | 5.84773E-05            | 2      | 1        | 1         | down  |
| MET         | 4.15838E-05            | 6      | 5        | 1         | down  |
| IGF1R       | 4.15838E-05            | 6      | 5        | 1         | up    |
| PDGFRA      | 4.15838E-05            | 6      | 5        | 1         | up    |
| CDK2        | 3.89848E-05            | 2      | 1        | 1         | up    |
| PDGFRB      | 2.59899E-05            | 4      | 3        | 1         | up    |
| KDR         | 2.20914E-05            | 4      | 3        | 1         | down  |
| FLT1        | 2.20914E-05            | 4      | 3        | 1         | up    |
| ADRB2       | 1.94924E-05            | 2      | 2        | 1         | up    |
| F2R         | 1.94924E-05            | 2      | 2        | 1         | up    |
| HLA-DRA     | 0                      | 7      | 7        | 7         | down  |
| SPP1        | 0                      | 6      | 0        | 6         | down  |
| CD74        | 0                      | 3      | 3        | 0         | down  |
| DUSP4       | 0                      | 1      | 0        | 1         | down  |
| DCC         | 0                      | 1      | 1        | 0         | down  |
| VCAM1       | 0                      | 2      | 2        | 1         | down  |
| HLA-DRB5    | 0                      | 7      | 7        | 7         | down  |
| NEDD4L      | 0                      | 6      | 0        | 6         | down  |
| TIAM1       | 0                      | 1      | 0        | 1         | down  |



|          |   |    |   |         |
|----------|---|----|---|---------|
| LAMA4    | 0 | 6  | 0 | 6 down  |
| LIFR     | 0 | 1  | 1 | 0 down  |
| SFRP2    | 0 | 5  | 0 | 5 down  |
| HLA-DQB1 | 0 | 7  | 7 | 7 down  |
| GHR      | 0 | 1  | 1 | 0 down  |
| HLA-DPA1 | 0 | 7  | 7 | 7 down  |
| GDF5     | 0 | 1  | 1 | 0 down  |
| WASF3    | 0 | 1  | 1 | 0 down  |
| LAMA3    | 0 | 6  | 0 | 6 down  |
| THBS2    | 0 | 7  | 0 | 7 down  |
| WNT5A    | 0 | 5  | 2 | 3 down  |
| HLA-DPB1 | 0 | 7  | 7 | 7 down  |
| MYLK     | 0 | 1  | 1 | 0 down  |
| GDF6     | 0 | 1  | 1 | 0 down  |
| GJA1     | 0 | 2  | 2 | 0 down  |
| LAMB1    | 0 | 6  | 0 | 6 down  |
| IFNA1    | 0 | 2  | 0 | 2 down  |
| CBLB     | 0 | 10 | 0 | 10 down |
| ARHGEF6  | 0 | 1  | 0 | 1 down  |
| RBPJ     | 0 | 1  | 1 | 0 down  |
| COL11A1  | 0 | 6  | 0 | 6 down  |
| PDGFA    | 0 | 6  | 0 | 6 down  |
| LAMC2    | 0 | 6  | 0 | 6 down  |
| TGFBR1   | 0 | 3  | 3 | 0 down  |
| RHOD     | 0 | 1  | 1 | 1 down  |
| IFNAR1   | 0 | 2  | 2 | 0 down  |
| HLA-DOA  | 0 | 7  | 7 | 7 down  |
| PIAS2    | 0 | 2  | 0 | 2 down  |
| IL1RAP   | 0 | 2  | 0 | 2 down  |
| E2F5     | 0 | 1  | 1 | 1 down  |
| MRVI1    | 0 | 2  | 0 | 2 down  |
| STK4     | 0 | 1  | 1 | 0 up    |
| IRAK4    | 0 | 2  | 2 | 0 up    |
| CDC25C   | 0 | 1  | 0 | 1 up    |
| NUMB     | 0 | 1  | 0 | 1 up    |
| PCNA     | 0 | 1  | 0 | 1 up    |
| CDC25A   | 0 | 2  | 0 | 2 up    |
| CCNA2    | 0 | 1  | 0 | 1 up    |
| LAMA2    | 0 | 6  | 0 | 6 up    |
| CDC6     | 0 | 2  | 2 | 0 up    |
| CRLF2    | 0 | 1  | 1 | 0 up    |
| LGMN     | 0 | 1  | 0 | 1 up    |
| PRKX     | 0 | 6  | 0 | 6 up    |
| SMC1A    | 0 | 1  | 1 | 0 up    |
| DUSP5    | 0 | 1  | 0 | 1 up    |
| NOG      | 0 | 3  | 0 | 3 up    |
| CDKN2C   | 0 | 1  | 0 | 1 up    |
| PSME1    | 0 | 1  | 1 | 0 up    |
| IL1R1    | 0 | 3  | 0 | 3 up    |
| JAG1     | 0 | 1  | 0 | 1 up    |
| WNT2B    | 0 | 5  | 2 | 3 up    |
| DUSP10   | 0 | 1  | 0 | 1 up    |
| CASP10   | 0 | 1  | 0 | 1 up    |
| MAPKAPK3 | 0 | 1  | 1 | 0 up    |
| CACNA1A  | 0 | 1  | 1 | 1 up    |
| DUSP1    | 0 | 1  | 0 | 1 up    |
| FGF5     | 0 | 4  | 0 | 4 up    |
| ABLIM3   | 0 | 1  | 1 | 0 up    |

|        |   |    |    |      |
|--------|---|----|----|------|
| PTK2   | 0 | 13 | 13 | 0 up |
| BMP4   | 0 | 1  | 1  | 0 up |
| CDC20  | 0 | 1  | 0  | 1 up |
| IQGAP3 | 0 | 1  | 1  | 0 up |
| WEE1   | 0 | 1  | 0  | 1 up |
| BIRC3  | 0 | 1  | 0  | 1 up |
| DCN    | 0 | 1  | 0  | 1 up |
| CYFIP2 | 0 | 1  | 1  | 0 up |
| SFRP1  | 0 | 5  | 0  | 5 up |
| GNG11  | 0 | 2  | 0  | 2 up |
| IRAK3  | 0 | 2  | 2  | 0 up |
| GRIA3  | 0 | 1  | 0  | 1 up |
| IL8    | 0 | 1  | 1  | 0 up |
| FGF7   | 0 | 4  | 0  | 4 up |
| GRK5   | 0 | 2  | 0  | 2 up |
| CXCL1  | 0 | 1  | 1  | 0 up |
